# Supplementary material for: Copper(ii)-catalyzed synthesis of sulfonyl-functionalized quinone-fused cyclopenta[b]indoles via four-component cascade annulation
Source: Royal Society of Chemistry journal article supplement (doi:10.1039/d4qo01560f), 2024-10-29

## Supporting Information

### **Copper(II)-Catalyzed Synthesis of Sulfonyl-functionalized Quinone-fused Cyclopenta[*b*]indoles via Four-component Cascade Annulation**

Hong Xu <sup>a, b †</sup>, Jie Liao <sup>a †</sup>, Fei Ren <sup>a</sup>, Chuan-Rong Zhou <sup>a</sup>, Xiao-Zhuo Liu <sup>a</sup>, Yao Xiao <sup>a</sup>, Dong-Wei Hang <sup>a</sup>, Fuyu Li <sup>a, b</sup>, Bei Wang <sup>a \*</sup>, Ji-Yu Wang <sup>a, b \*</sup>

Ji-Yu Wang: [Jiyuwang@cioc.ac.cn](mailto:Jiyuwang@cioc.ac.cn); Bei Wang: [wangbei1004@163.com](mailto:wangbei1004@163.com).

<sup>†</sup>These authors contributed equally to this work.

---

*\*Corresponding author:*

*Ji-Yu Wang: [Jiyuwang@cioc.ac.cn](mailto:Jiyuwang@cioc.ac.cn); Bei Wang: [wangbei1004@163.com](mailto:wangbei1004@163.com).*

*<sup>†</sup>Hong Xu and Jie Liao contributed equally to this work.*

## Contents

|                                                                     |           |
|---------------------------------------------------------------------|-----------|
| <b>1. General Information .....</b>                                 | <b>3</b>  |
| <b>2. Methods and Experimental Procedures.....</b>                  | <b>4</b>  |
| <i>2.1 Tables for the optimization of reaction conditions .....</i> | <i>4</i>  |
| <i>2.2 General procedures for the Synthesis of Products .....</i>   | <i>9</i>  |
| <b>3. X-Ray Crystallographic Data.....</b>                          | <b>10</b> |
| <i>3.1 X-Ray Crystallographic Data of 5 .....</i>                   | <i>10</i> |
| <i>3.2 X-Ray Crystallographic Data of 41 .....</i>                  | <i>19</i> |
| <b>4. Characterization of compounds.....</b>                        | <b>27</b> |
| <b>6. NMR Spectra of New Compounds.....</b>                         | <b>48</b> |

## 1. General Information

Unless otherwise noted, all reagents were from commercial sources and used as received without further purification. Column chromatography was generally performed on silica gel (200-300 mesh) and reactions were monitored by thin layer chromatography (GF-254 silica gel plate) using UV light (254 nm) to visualize the course of the reactions.  $^1\text{H}$ ,  $^{13}\text{C}$  NMR spectra were recorded at 400 MHz on an Agilent spectrometer. Data are reported in the following order: chemical shift ( $\delta$ ) in ppm; multiplicities are indicated s (singlet), d (doublet), t (triplet), dd (doublet of doublets), m (multiplet); coupling constants ( $J$ ) are in Hertz (Hz). NMR spectra were taken using TMS ( $^1\text{H}$ ,  $\delta = 0$ ),  $\text{CDCl}_3$  ( $^1\text{H}$ ,  $\delta = 7.26$ ), and  $\text{CDCl}_3$  ( $^{13}\text{C}$ , CPD  $\delta = 77.16$ ) as the internal standards, respectively. HRMS were undertaken on a Thermo Scientific LTQ Orbitrap XL instrument. Melting points were tested with Hanon MP430.

## 2. Methods and Experimental Procedures

### 2.1 Tables for the optimization of reaction conditions

**Table S1** Screening of the necessity of catalyst and ligand <sup>a, b, c</sup>

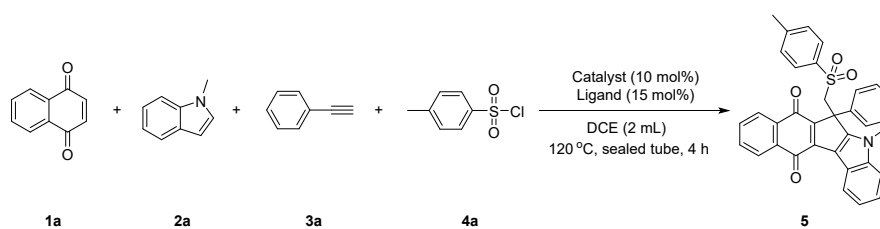

| Entry | Catalyst              | Ligand | Yield (%) |
|-------|-----------------------|--------|-----------|
| 1     | Cu(acac) <sub>2</sub> | DPPE   | 49        |
| 2     | Cu(acac) <sub>2</sub> | -      | 35        |
| 3     | -                     | DPPE   | N.D       |
| 4     | -                     | -      | N.D       |

Reaction conditions: <sup>a</sup> **1a** (0.2 mmol), **2a** (0.2 mmol), **3a** (0.6 mmol), **4a** (0.6 mmol), catalyst (10 mol%), ligand (15 mol%), DCE (2 mL), T = 120 °C, t = 4 h. <sup>b</sup> Isolated yield. <sup>c</sup> N.D means not detected.

**Table S2** Screening of catalyst <sup>a, b, c</sup>

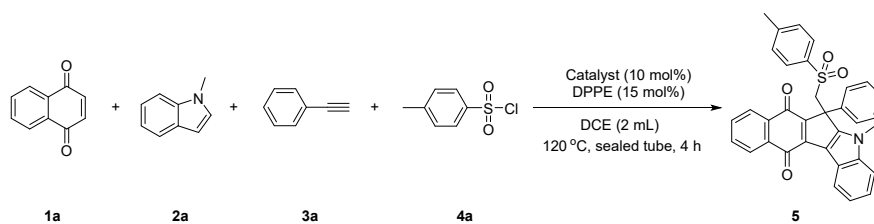

| Entry | Catalyst                             | Yield (%) |
|-------|--------------------------------------|-----------|
| 1     | Cu(acac) <sub>2</sub>                | 49        |
| 2     | Cu(OTf) <sub>2</sub>                 | 41        |
| 3     | Cu(OAc) <sub>2</sub>                 | 32        |
| 4     | CuCl <sub>2</sub> •2H <sub>2</sub> O | 38        |

|    |                                                      |     |
|----|------------------------------------------------------|-----|
| 5  | CuBr <sub>2</sub>                                    | 29  |
| 6  | CuSO <sub>4</sub> •5H <sub>2</sub> O                 | 27  |
| 7  | CuI                                                  | 42  |
| 8  | Co(acac) <sub>2</sub>                                | N.D |
| 9  | CoCl <sub>2</sub>                                    | 1   |
| 10 | CoCO <sub>3</sub>                                    | 45  |
| 11 | Co(OAc) <sub>2</sub>                                 | N.D |
| 12 | Co(NO <sub>3</sub> ) <sub>2</sub> •6H <sub>2</sub> O | 26  |
| 13 | Fe(acac) <sub>3</sub>                                | 10  |
| 14 | Fe(OTs) <sub>3</sub> •6H <sub>2</sub> O              | 17  |
| 15 | Feox                                                 | 22  |
| 16 | FeCl <sub>3</sub>                                    | 19  |
| 17 | FeSO <sub>4</sub> •7H <sub>2</sub> O                 | 24  |
| 18 | Ni(acac) <sub>2</sub>                                | N.D |
| 19 | Ni(OTf) <sub>2</sub>                                 | 1   |
| 20 | NiCl <sub>2</sub>                                    | N.D |
| 21 | Ni(OAc) <sub>2</sub> •4H <sub>2</sub> O              | N.D |
| 22 | NiCO <sub>3</sub>                                    | N.D |

Reaction conditions: <sup>a</sup> **1a** (0.2 mmol), **2a** (0.2 mmol), **3a** (0.6 mmol), **4a** (0.6 mmol), catalyst (10 mol%), DPPE (15 mol%), DCE (2 mL), T =120 °C, t=4 h. <sup>b</sup> Isolated yield. <sup>c</sup> N.D means not detected.

**Table S3** Screening of ligand <sup>a, b, c</sup>

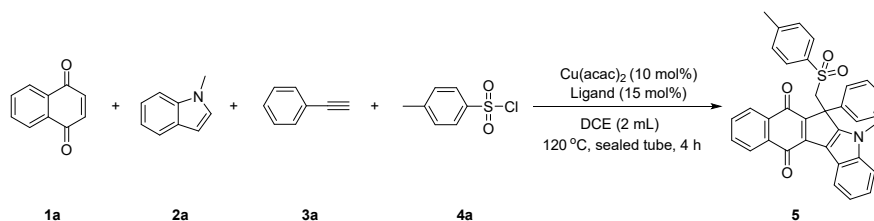

| Entry | Ligand           | Yield (%) |
|-------|------------------|-----------|
| 1     | NEt <sub>3</sub> | 35        |

|    |                      |    |
|----|----------------------|----|
| 2  | Py                   | 12 |
| 3  | CH <sub>3</sub> COOH | 29 |
| 4  | CF <sub>3</sub> COOH | 42 |
| 5  | PPh <sub>3</sub>     | 17 |
| 6  | Bipy                 | 19 |
| 7  | 1,10-Phen            | 44 |
| 8  | 8-Hydroxyquinoline   | 36 |
| 9  | BINAP                | 56 |
| 10 | DPEPhos              | 30 |

Reaction conditions: <sup>a</sup> **1a** (0.2 mmol), **2a** (0.2 mmol), **3a** (0.6 mmol), **4a** (0.6 mmol), Cu(acac)<sub>2</sub> (10 mol%), ligand (15 mol%), DCE (2 mL), T =120 °C, t=4 h. <sup>b</sup> Isolated yield. <sup>c</sup> N.D means not detected. Bis[2-(diphenylphosphino)phenyl] Ether=DPEPhos, 1,1'-Binaphthyl-2,2'-diphemyl phosphine=BINAP.

**Table S4** Screening of solvent <sup>a, b, c</sup>

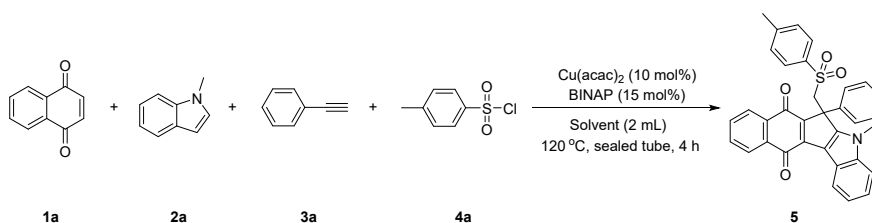

| Entry | Solvent            | Yield (%) |
|-------|--------------------|-----------|
| 1     | DCE                | 56        |
| 2     | CH <sub>3</sub> CN | 48        |
| 3     | EA                 | 19        |
| 4     | 1,4-dioxane        | 7         |
| 5     | toluene            | 12        |
| 6     | DMSO               | N.D       |
| 7     | DMF                | N.D       |
| 8     | THF                | 8         |
| 9     | CHCl <sub>3</sub>  | 9         |

Reaction conditions: <sup>a</sup> **1a** (0.2 mmol), **2a** (0.2 mmol), **3a** (0.6 mmol), **4a** (0.6 mmol), Cu(acac)<sub>2</sub> (10 mol%), BINAP (15 mol%), solvent (2 mL), T =120 °C, t=4 h. <sup>b</sup> Isolated yield. <sup>c</sup> N.D means not detected.

**Table S5** Screening the ratio of substrate <sup>a, b</sup>

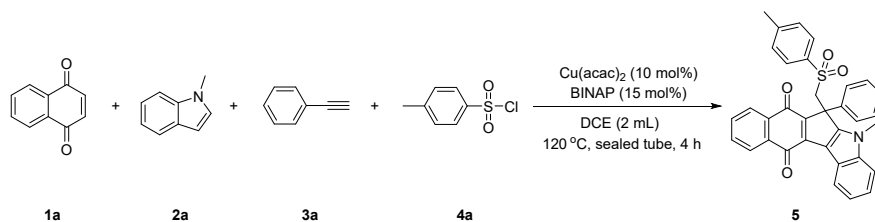

| Entry    | <b>1a</b>  | <b>2a</b>  | <b>3a</b>  | <b>4a</b>  | Yield (%) |
|----------|------------|------------|------------|------------|-----------|
| 1        | 0.4        | 0.2        | 0.6        | 0.6        | 32        |
| 2        | 0.2        | 0.4        | 0.6        | 0.6        | 40        |
| 3        | 0.4        | 0.4        | 0.2        | 0.6        | 29        |
| 4        | 0.4        | 0.4        | 0.6        | 0.2        | 21        |
| 5        | 0.2        | 0.2        | 0.2        | 0.2        | 20        |
| <b>6</b> | <b>0.2</b> | <b>0.2</b> | <b>0.6</b> | <b>0.6</b> | <b>56</b> |

Reaction conditions: <sup>a</sup> **1a** (x mmol), **2a** (y mmol), **3a** (z mmol), **4a** (m mmol), Cu(acac)<sub>2</sub> (10 mol%), BINAP (15 mol%), DCE (2 mL), T =120 °C, t=4 h. <sup>b</sup> Isolated yield.

**Table S6** Screening of chiral ligand <sup>a, b</sup>

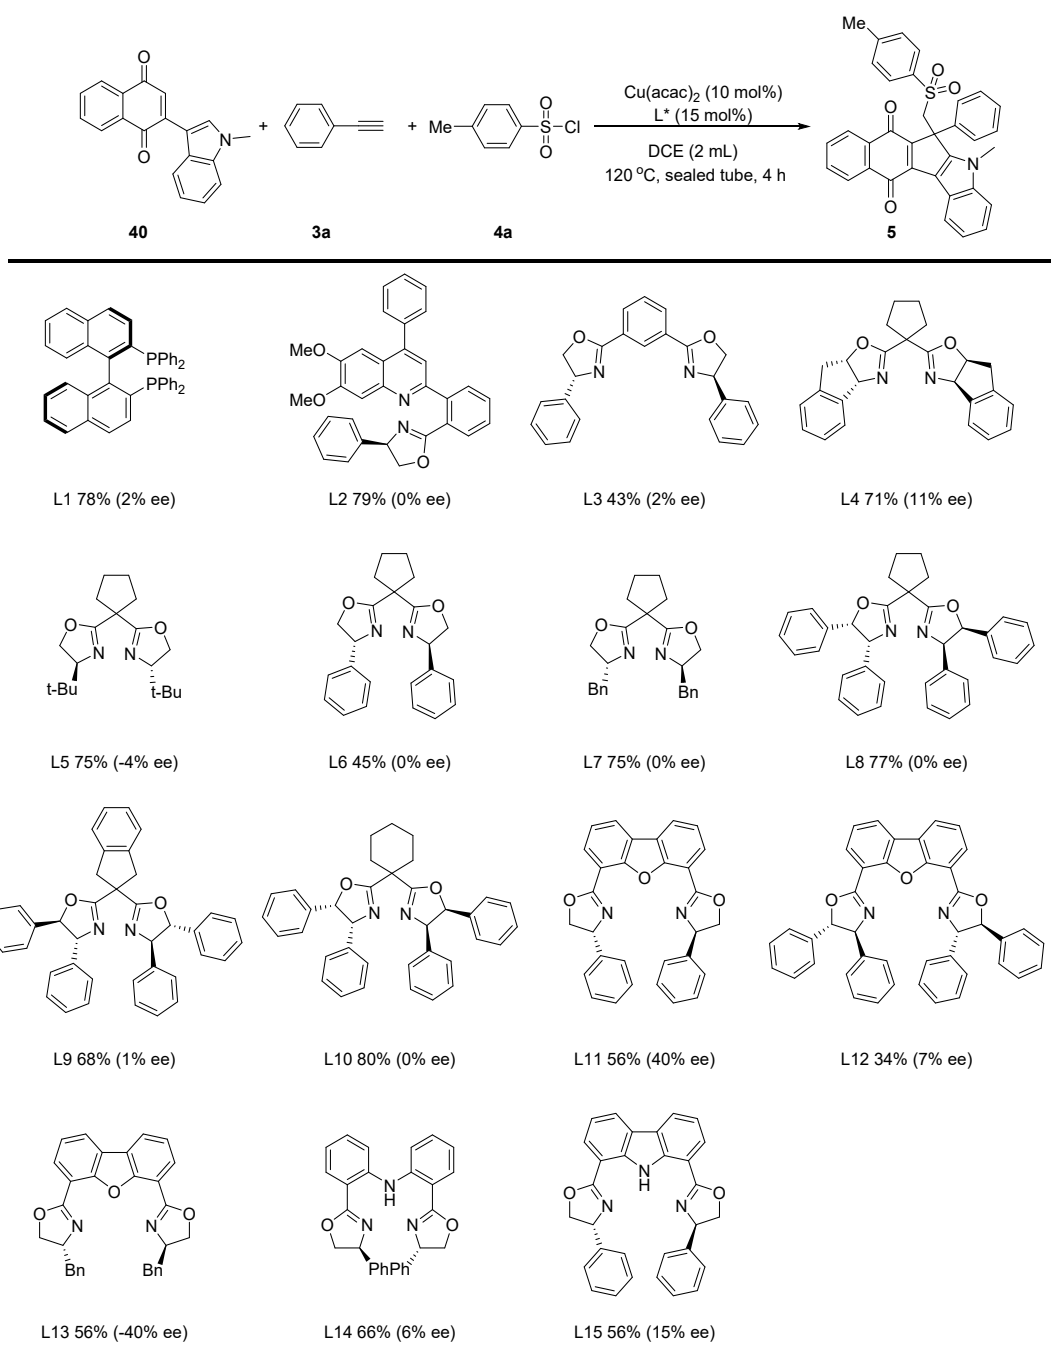

Reaction conditions: <sup>a</sup> **40** (0.2 mmol), **3a** (0.6 mmol), **4a** (0.6 mmol), Cu(acac)<sub>2</sub> (10 mol%), L\* (15 mol%), DCE (2 mL), T =120 °C, t=4 h. <sup>b</sup> Isolated yield.



## 2.2 General procedures for the Synthesis of Products

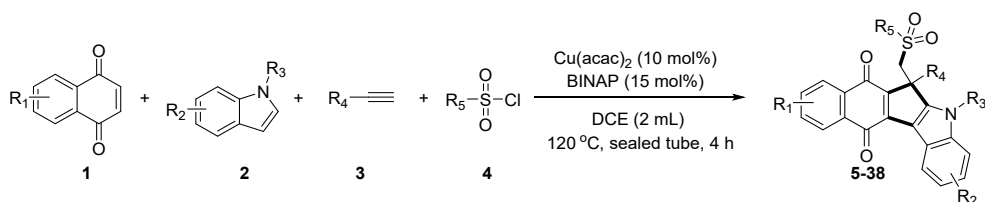

Quinone (0.2 mmol, 1.0 equiv), indole (0.2 mmol, 1.0 equiv), alkyne (0.6 mmol, 3.0 equiv), sulfonyl chloride (0.6 mmol, 3.0 equiv), Cu(acac)<sub>2</sub> (10 mol%), BINAP (15 mol%) were sequentially added into the reaction flask and immediately dissolve them with 2 mL DCE, and the mixture was heated to 120 °C and stirred in the oil bath. After the reaction was completed, the solution was diluted with water and extracted three times with DCM. The organic phase was dried with anhydrous magnesium sulfate. The solvent was evaporated to dryness under reduced pressure, and the product was purified by column chromatography using ethyl acetate/petroleum ether as the eluent to obtain product. If the product is not pure, it can be recrystallized with ethyl acetate and petroleum ether.

### 3. X-Ray Crystallographic Data

#### 3.1 X-Ray Crystallographic Data of 5

Single crystals of  $C_{34}H_{25}NO_4S$  **5** were grown from ethyl acetate and PE. The ellipsoids are shown at 50% probability levels. A suitable crystal was selected and collected at 170.00 (10) K on a SuperNova, Dual, Cu at zero, AtlasS2 diffractometer. The data were collected and processed using CrysAlisPro. The structures were solved by direct methods using Olex2 software with the SHELXT structure solution program via intrinsic phasing algorithm, and the non-hydrogen atoms were located from the trial structure and then refined anisotropically with SHELXL-2018 using a full-matrix least squares procedure based on  $F^2$ . The weighted  $R$  factor,  $wR$  and goodness-of-fit  $S$  values were obtained based on  $F^2$ . The hydrogen atom positions were fixed geometrically at the calculated distances and allowed to ride on their parent atoms. Crystallographic data for the structure reported in this paper have been deposited at the Cambridge Crystallographic Data Center and allocated with the deposition numbers: CCDC 2322361 for compound **5**.

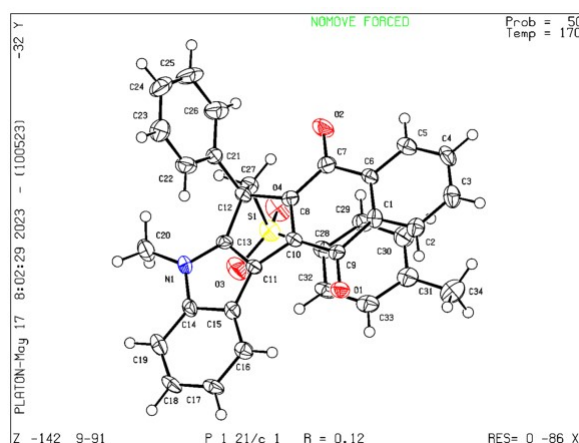

**Figure S1** ORTEP Drawing of **5**

(The ellipsoids are shown at 50% probability levels)

**Table S7** Crystal data and structure refinement for **5**.

|                     |                     |
|---------------------|---------------------|
| Identification code | 5                   |
| Empirical formula   | $C_{34}H_{25}NO_4S$ |
| Formula weight      | 543.61              |

|                                             |                                                                |
|---------------------------------------------|----------------------------------------------------------------|
| Temperature/K                               | 170.00(10)                                                     |
| Crystal system                              | monoclinic                                                     |
| Space group                                 | P2 <sub>1</sub> /c                                             |
| a/Å                                         | 18.415(2)                                                      |
| b/Å                                         | 10.7614(11)                                                    |
| c/Å                                         | 13.5967(18)                                                    |
| $\alpha$ /°                                 | 90                                                             |
| $\beta$ /°                                  | 106.405(14)                                                    |
| $\gamma$ /°                                 | 90                                                             |
| Volume/Å <sup>3</sup>                       | 2584.7(6)                                                      |
| Z                                           | 4                                                              |
| $\rho_{\text{calc}}/\text{g}/\text{cm}^3$   | 1.397                                                          |
| $\mu/\text{mm}^{-1}$                        | 0.168                                                          |
| F(000)                                      | 1136.0                                                         |
| Crystal size/mm <sup>3</sup>                | 0.15 × 0.14 × 0.11                                             |
| Radiation                                   | Mo K $\alpha$ ( $\lambda$ = 0.71073)                           |
| 2 $\Theta$ range for data collection/°      | 4.432 to 49.996                                                |
| Index ranges                                | -21 ≤ h ≤ 18, -10 ≤ k ≤ 12, -16 ≤ l ≤ 16                       |
| Reflections collected                       | 10884                                                          |
| Independent reflections                     | 4554 [ $R_{\text{int}}$ = 0.0550, $R_{\text{sigma}}$ = 0.0730] |
| Data/restraints/parameters                  | 4554/0/363                                                     |
| Goodness-of-fit on F <sup>2</sup>           | 1.159                                                          |
| Final R indexes [ $I \geq 2\sigma(I)$ ]     | $R_1$ = 0.1191, $wR_2$ = 0.2476                                |
| Final R indexes [all data]                  | $R_1$ = 0.1427, $wR_2$ = 0.2592                                |
| Largest diff. peak/hole / e Å <sup>-3</sup> | 0.51/-0.59                                                     |

### Crystal structure determination of 5

**Crystal Data** for C<sub>34</sub>H<sub>25</sub>NO<sub>4</sub>S ( $M$  = 543.61 g/mol): monoclinic, space group P2<sub>1</sub>/c (no. 14),  $a$  = 18.415(2) Å,  $b$  = 10.7614(11) Å,  $c$  = 13.5967(18) Å,  $\beta$  = 106.405(14)°,  $V$  = 2584.7(6) Å<sup>3</sup>,  $Z$  = 4,  $T$  = 170.00(10) K,  $\mu$ (Mo K $\alpha$ ) = 0.168 mm<sup>-1</sup>,  $D_{\text{calc}}$  = 1.397 g/cm<sup>3</sup>, 10884 reflections measured (4.432° ≤ 2 $\Theta$  ≤ 49.996°), 4554 unique ( $R_{\text{int}}$  = 0.0550,  $R_{\text{sigma}}$  = 0.0730) which were used in all calculations. The final  $R_1$  was 0.1191 ( $I > 2\sigma(I)$ ) and  $wR_2$  was 0.2592 (all data).

### Refinement model description

**Table S8 Fractional Atomic Coordinates (×10<sup>4</sup>) and Equivalent Isotropic Displacement Parameters (Å<sup>2</sup>×10<sup>3</sup>) for 5.**  $U_{\text{eq}}$  is defined as 1/3 of the trace of the orthogonalised  $U_{ij}$  tensor.

| Atom | $x$ | $y$ | $z$ | $U(\text{eq})$ |
|------|-----|-----|-----|----------------|
|------|-----|-----|-----|----------------|

**Table S8 Fractional Atomic Coordinates ( $\times 10^4$ ) and Equivalent Isotropic Displacement Parameters ( $\text{\AA}^2 \times 10^3$ ) for 5.  $U_{\text{eq}}$  is defined as 1/3 of the trace of the orthogonalised  $U_{ij}$  tensor.**

| Atom | <i>x</i>   | <i>y</i>   | <i>z</i>   | $U(\text{eq})$ |
|------|------------|------------|------------|----------------|
| S1   | 3492.6(11) | 3094.8(17) | 4804.5(14) | 34.4(5)        |
| O1   | 775(2)     | 5893(4)    | 4905(3)    | 29.3(11)       |
| O2   | 3571(3)    | 5231(5)    | 7480(4)    | 42.5(13)       |
| O3   | 3276(3)    | 3277(5)    | 3706(4)    | 43.2(13)       |
| O4   | 4049(3)    | 2168(5)    | 5265(4)    | 46.9(14)       |
| N1   | 2991(3)    | 6035(5)    | 3218(4)    | 25.9(12)       |
| C1   | 1518(3)    | 5532(5)    | 6619(5)    | 21.9(14)       |
| C2   | 896(4)     | 5472(6)    | 7010(5)    | 28.9(15)       |
| C3   | 995(4)     | 5219(7)    | 8043(5)    | 35.1(17)       |
| C4   | 1715(4)    | 5008(6)    | 8682(5)    | 32.4(16)       |
| C5   | 2337(4)    | 5058(6)    | 8301(5)    | 29.0(15)       |
| C6   | 2253(4)    | 5338(6)    | 7277(5)    | 23.1(14)       |
| C7   | 2929(4)    | 5403(6)    | 6896(5)    | 27.4(15)       |
| C8   | 2796(3)    | 5658(6)    | 5813(5)    | 22.7(13)       |
| C9   | 1405(3)    | 5763(5)    | 5511(5)    | 20.5(13)       |
| C10  | 2092(3)    | 5827(5)    | 5158(4)    | 18.8(13)       |
| C11  | 2142(3)    | 5965(5)    | 4133(4)    | 20.5(13)       |
| C12  | 3407(3)    | 5727(6)    | 5242(5)    | 25.3(14)       |
| C13  | 2889(3)    | 5891(6)    | 4162(5)    | 22.8(14)       |
| C14  | 2274(4)    | 6138(6)    | 2540(5)    | 25.0(14)       |
| C15  | 1717(4)    | 6124(6)    | 3079(5)    | 23.4(14)       |
| C16  | 954(4)     | 6236(6)    | 2540(5)    | 27.4(15)       |
| C17  | 760(4)     | 6335(6)    | 1483(5)    | 29.6(15)       |
| C18  | 1312(4)    | 6339(6)    | 959(5)     | 28.7(15)       |
| C19  | 2071(4)    | 6262(6)    | 1470(5)    | 32.3(16)       |
| C20  | 3698(4)    | 5992(8)    | 2945(5)    | 39.1(18)       |
| C21  | 3924(4)    | 6858(6)    | 5593(5)    | 24.4(14)       |
| C22  | 3731(4)    | 7991(7)    | 5111(5)    | 38.9(18)       |
| C23  | 4182(5)    | 9046(7)    | 5431(6)    | 47(2)          |
| C24  | 4839(4)    | 8955(9)    | 6209(6)    | 48(2)          |
| C25  | 5038(4)    | 7847(9)    | 6726(6)    | 47(2)          |
| C26  | 4584(4)    | 6784(8)    | 6414(6)    | 41.2(19)       |
| C27  | 3899(4)    | 4512(6)    | 5410(5)    | 29.1(15)       |
| C28  | 2674(4)    | 2790(6)    | 5188(5)    | 28.1(15)       |
| C29  | 2747(4)    | 2318(6)    | 6174(5)    | 34.3(17)       |
| C30  | 2115(4)    | 2106(7)    | 6483(6)    | 37.8(18)       |
| C31  | 1385(4)    | 2364(6)    | 5841(5)    | 31.8(16)       |

**Table S8 Fractional Atomic Coordinates ( $\times 10^4$ ) and Equivalent Isotropic Displacement Parameters ( $\text{\AA}^2 \times 10^3$ ) for 5.  $U_{\text{eq}}$  is defined as 1/3 of the trace of the orthogonalised  $U_{\text{IJ}}$  tensor.**

| Atom | $x$     | $y$     | $z$     | $U(\text{eq})$ |
|------|---------|---------|---------|----------------|
| C32  | 1965(4) | 3019(6) | 4527(5) | 30.7(16)       |
| C33  | 1326(4) | 2815(6) | 4846(5) | 32.1(16)       |
| C34  | 702(4)  | 2154(7) | 6193(7) | 45(2)          |

**Table S9 Anisotropic Displacement Parameters ( $\text{\AA}^2 \times 10^3$ ) for 5. The Anisotropic displacement factor exponent takes the form:  $-2\pi^2[h^2a^*2U_{11}+2hka^*b^*U_{12}+\dots]$ .**

| Atom | $U_{11}$ | $U_{22}$ | $U_{33}$ | $U_{23}$ | $U_{13}$ | $U_{12}$ |
|------|----------|----------|----------|----------|----------|----------|
| S1   | 43.0(10) | 29.0(9)  | 31.9(10) | 0.2(8)   | 11.6(8)  | 5.3(8)   |
| O1   | 24(2)    | 37(3)    | 24(2)    | 0(2)     | 2.4(19)  | 1(2)     |
| O2   | 32(3)    | 66(4)    | 25(3)    | 11(3)    | 0(2)     | 4(3)     |
| O3   | 59(3)    | 44(3)    | 30(3)    | -2(2)    | 17(2)    | 0(3)     |
| O4   | 57(3)    | 33(3)    | 52(3)    | 4(3)     | 17(3)    | 17(3)    |
| N1   | 31(3)    | 26(3)    | 22(3)    | 7(2)     | 10(2)    | -1(2)    |
| C1   | 30(3)    | 8(3)     | 29(3)    | 7(2)     | 9(3)     | 3(3)     |
| C2   | 32(4)    | 25(4)    | 33(4)    | -3(3)    | 13(3)    | -2(3)    |
| C3   | 41(4)    | 36(4)    | 35(4)    | 0(3)     | 22(3)    | 0(3)     |
| C4   | 53(5)    | 28(4)    | 20(3)    | -3(3)    | 16(3)    | -6(3)    |
| C5   | 39(4)    | 20(3)    | 24(3)    | 1(3)     | 3(3)     | 3(3)     |
| C6   | 33(4)    | 16(3)    | 18(3)    | 1(2)     | 3(3)     | -2(3)    |
| C7   | 28(3)    | 23(3)    | 28(4)    | 4(3)     | 2(3)     | -1(3)    |
| C8   | 23(3)    | 18(3)    | 25(3)    | 1(3)     | 3(3)     | 0(3)     |
| C9   | 25(3)    | 11(3)    | 23(3)    | -2(2)    | 4(3)     | -2(3)    |
| C10  | 28(3)    | 10(3)    | 16(3)    | -1(2)    | 3(2)     | 1(2)     |
| C11  | 28(3)    | 15(3)    | 17(3)    | 0(2)     | 3(3)     | -2(3)    |
| C12  | 24(3)    | 29(4)    | 19(3)    | 8(3)     | 1(3)     | 2(3)     |
| C13  | 28(3)    | 18(3)    | 19(3)    | 0(3)     | 0(3)     | -6(3)    |
| C14  | 35(4)    | 19(3)    | 21(3)    | 5(3)     | 9(3)     | -2(3)    |
| C15  | 34(3)    | 13(3)    | 24(3)    | 1(3)     | 9(3)     | 0(3)     |
| C16  | 32(4)    | 23(3)    | 25(3)    | 2(3)     | 5(3)     | 3(3)     |
| C17  | 41(4)    | 21(3)    | 19(3)    | 2(3)     | -3(3)    | 1(3)     |
| C18  | 49(4)    | 20(3)    | 14(3)    | 2(3)     | 3(3)     | 4(3)     |
| C19  | 50(4)    | 26(4)    | 24(4)    | 4(3)     | 16(3)    | 2(3)     |
| C20  | 35(4)    | 55(5)    | 29(4)    | 13(4)    | 13(3)    | 6(4)     |
| C21  | 31(3)    | 19(3)    | 23(3)    | -2(3)    | 7(3)     | -5(3)    |
| C22  | 41(4)    | 38(4)    | 29(4)    | 6(3)     | -4(3)    | -8(3)    |
| C23  | 61(5)    | 31(4)    | 46(5)    | 7(4)     | 9(4)     | -19(4)   |

**Table S9 Anisotropic Displacement Parameters ( $\text{\AA}^2 \times 10^3$ ) for 5. The Anisotropic displacement factor exponent takes the form:  $-2\pi^2[h^2a^{*2}U_{11}+2hka^*b^*U_{12}+\dots]$ .**

| Atom | $U_{11}$ | $U_{22}$ | $U_{33}$ | $U_{23}$ | $U_{13}$ | $U_{12}$ |
|------|----------|----------|----------|----------|----------|----------|
| C24  | 37(4)    | 60(6)    | 50(5)    | -26(4)   | 18(4)    | -23(4)   |
| C25  | 20(4)    | 66(6)    | 48(5)    | -21(4)   | 0(3)     | -3(4)    |
| C26  | 30(4)    | 51(5)    | 38(4)    | -8(4)    | 3(3)     | 2(4)     |
| C27  | 29(3)    | 30(4)    | 26(4)    | 2(3)     | 5(3)     | -1(3)    |
| C28  | 36(4)    | 21(3)    | 25(4)    | 2(3)     | 3(3)     | 1(3)     |
| C29  | 38(4)    | 29(4)    | 29(4)    | 8(3)     | -1(3)    | -2(3)    |
| C30  | 47(4)    | 29(4)    | 36(4)    | 1(3)     | 10(3)    | -7(3)    |
| C31  | 42(4)    | 15(3)    | 36(4)    | -3(3)    | 7(3)     | -2(3)    |
| C32  | 48(4)    | 17(3)    | 21(3)    | -3(3)    | -2(3)    | 0(3)     |
| C33  | 41(4)    | 19(3)    | 32(4)    | -6(3)    | 2(3)     | -1(3)    |
| C34  | 42(4)    | 31(4)    | 61(6)    | -6(4)    | 14(4)    | -1(4)    |

**Table S10 Bond Lengths for 5.**

| Atom | Atom | Length/ $\text{\AA}$ | Atom | Atom | Length/ $\text{\AA}$ |
|------|------|----------------------|------|------|----------------------|
| S1   | O3   | 1.446(5)             | C11  | C15  | 1.435(8)             |
| S1   | O4   | 1.439(5)             | C12  | C13  | 1.519(8)             |
| S1   | C27  | 1.793(7)             | C12  | C21  | 1.536(9)             |
| S1   | C28  | 1.760(7)             | C12  | C27  | 1.570(9)             |
| O1   | C9   | 1.227(7)             | C14  | C15  | 1.420(9)             |
| O2   | C7   | 1.238(8)             | C14  | C19  | 1.403(9)             |
| N1   | C13  | 1.356(8)             | C15  | C16  | 1.395(9)             |
| N1   | C14  | 1.384(8)             | C16  | C17  | 1.384(9)             |
| N1   | C20  | 1.453(8)             | C17  | C18  | 1.395(10)            |
| C1   | C2   | 1.392(9)             | C18  | C19  | 1.377(10)            |
| C1   | C6   | 1.412(9)             | C21  | C22  | 1.382(9)             |
| C1   | C9   | 1.482(8)             | C21  | C26  | 1.402(9)             |
| C2   | C3   | 1.392(9)             | C22  | C23  | 1.402(10)            |
| C3   | C4   | 1.384(10)            | C23  | C24  | 1.367(11)            |
| C4   | C5   | 1.385(10)            | C24  | C25  | 1.380(12)            |
| C5   | C6   | 1.389(9)             | C25  | C26  | 1.410(11)            |
| C6   | C7   | 1.480(9)             | C28  | C29  | 1.405(9)             |
| C7   | C8   | 1.449(9)             | C28  | C32  | 1.382(9)             |
| C8   | C10  | 1.361(8)             | C29  | C30  | 1.364(10)            |
| C8   | C12  | 1.539(9)             | C30  | C31  | 1.408(10)            |
| C9   | C10  | 1.476(8)             | C31  | C33  | 1.412(10)            |
| C10  | C11  | 1.430(8)             | C31  | C34  | 1.484(10)            |

**Table S10 Bond Lengths for 5.**

| Atom | Atom | Length/Å | Atom | Atom | Length/Å  |
|------|------|----------|------|------|-----------|
| C11  | C13  | 1.368(9) | C32  | C33  | 1.381(10) |

**Table S11 Bond Angles for 5.**

| Atom | Atom | Atom | Angle/°  | Atom | Atom | Atom | Angle/°  |
|------|------|------|----------|------|------|------|----------|
| O3   | S1   | C27  | 108.5(3) | C13  | C12  | C21  | 111.9(5) |
| O3   | S1   | C28  | 108.8(3) | C13  | C12  | C27  | 114.6(5) |
| O4   | S1   | O3   | 119.9(3) | C21  | C12  | C8   | 111.1(5) |
| O4   | S1   | C27  | 103.6(3) | C21  | C12  | C27  | 109.5(5) |
| O4   | S1   | C28  | 107.8(3) | N1   | C13  | C11  | 111.9(5) |
| C28  | S1   | C27  | 107.7(3) | N1   | C13  | C12  | 135.4(6) |
| C13  | N1   | C14  | 106.2(5) | C11  | C13  | C12  | 112.7(5) |
| C13  | N1   | C20  | 127.6(5) | N1   | C14  | C15  | 110.3(5) |
| C14  | N1   | C20  | 126.0(5) | N1   | C14  | C19  | 128.6(6) |
| C2   | C1   | C6   | 119.7(6) | C19  | C14  | C15  | 121.1(6) |
| C2   | C1   | C9   | 120.1(6) | C14  | C15  | C11  | 104.3(5) |
| C6   | C1   | C9   | 120.2(5) | C16  | C15  | C11  | 135.9(6) |
| C3   | C2   | C1   | 120.5(6) | C16  | C15  | C14  | 119.7(6) |
| C4   | C3   | C2   | 119.6(6) | C17  | C16  | C15  | 118.6(6) |
| C5   | C4   | C3   | 120.5(6) | C16  | C17  | C18  | 121.3(6) |
| C4   | C5   | C6   | 120.8(6) | C19  | C18  | C17  | 121.6(6) |
| C1   | C6   | C7   | 121.5(5) | C18  | C19  | C14  | 117.7(6) |
| C5   | C6   | C1   | 118.9(6) | C22  | C21  | C12  | 119.9(6) |
| C5   | C6   | C7   | 119.6(6) | C22  | C21  | C26  | 118.5(6) |
| O2   | C7   | C6   | 120.9(6) | C26  | C21  | C12  | 121.6(6) |
| O2   | C7   | C8   | 122.5(6) | C21  | C22  | C23  | 121.1(7) |
| C8   | C7   | C6   | 116.5(5) | C24  | C23  | C22  | 120.0(8) |
| C7   | C8   | C12  | 125.7(5) | C23  | C24  | C25  | 120.4(7) |
| C10  | C8   | C7   | 123.2(6) | C24  | C25  | C26  | 119.9(7) |
| C10  | C8   | C12  | 111.1(5) | C21  | C26  | C25  | 120.0(8) |
| O1   | C9   | C1   | 122.4(5) | C12  | C27  | S1   | 119.5(5) |
| O1   | C9   | C10  | 120.8(5) | C29  | C28  | S1   | 119.4(5) |
| C10  | C9   | C1   | 116.9(5) | C32  | C28  | S1   | 120.3(5) |
| C8   | C10  | C9   | 121.7(5) | C32  | C28  | C29  | 120.3(7) |
| C8   | C10  | C11  | 109.9(5) | C30  | C29  | C28  | 119.5(6) |
| C11  | C10  | C9   | 128.2(5) | C29  | C30  | C31  | 121.7(7) |
| C10  | C11  | C15  | 144.9(6) | C30  | C31  | C33  | 117.6(7) |
| C13  | C11  | C10  | 107.9(5) | C30  | C31  | C34  | 121.1(7) |

**Table S11 Bond Angles for 5.**

| Atom | Atom | Atom | Angle/°  | Atom | Atom | Atom | Angle/°  |
|------|------|------|----------|------|------|------|----------|
| C13  | C11  | C15  | 107.2(5) | C33  | C31  | C34  | 121.2(7) |
| C8   | C12  | C27  | 111.1(5) | C33  | C32  | C28  | 119.9(6) |
| C13  | C12  | C8   | 98.3(5)  | C32  | C33  | C31  | 120.9(6) |

**Table S12 Torsion Angles for 5.**

| A  | B   | C   | D   | Angle/°   | A   | B   | C   | D   | Angle/°   |
|----|-----|-----|-----|-----------|-----|-----|-----|-----|-----------|
| S1 | C28 | C29 | C30 | 178.6(6)  | C10 | C11 | C13 | N1  | -178.9(5) |
| S1 | C28 | C32 | C33 | -177.9(5) | C10 | C11 | C13 | C12 | -1.5(7)   |
| O1 | C9  | C10 | C8  | -178.5(6) | C10 | C11 | C15 | C14 | -178.2(8) |
| O1 | C9  | C10 | C11 | -3.7(9)   | C10 | C11 | C15 | C16 | 0.8(15)   |
| O2 | C7  | C8  | C10 | 178.8(6)  | C11 | C15 | C16 | C17 | -177.6(7) |
| O2 | C7  | C8  | C12 | 1.2(10)   | C12 | C8  | C10 | C9  | 178.0(5)  |
| O3 | S1  | C27 | C12 | 61.1(6)   | C12 | C8  | C10 | C11 | 2.4(7)    |
| O3 | S1  | C28 | C29 | 166.3(5)  | C12 | C21 | C22 | C23 | 178.5(7)  |
| O3 | S1  | C28 | C32 | -14.1(6)  | C12 | C21 | C26 | C25 | -178.9(6) |
| O4 | S1  | C27 | C12 | -170.5(5) | C13 | N1  | C14 | C15 | 3.1(7)    |
| O4 | S1  | C28 | C29 | 34.8(6)   | C13 | N1  | C14 | C19 | -177.8(7) |
| O4 | S1  | C28 | C32 | -145.5(5) | C13 | C11 | C15 | C14 | -0.3(7)   |
| N1 | C14 | C15 | C11 | -1.8(7)   | C13 | C11 | C15 | C16 | 178.7(7)  |
| N1 | C14 | C15 | C16 | 179.1(6)  | C13 | C12 | C21 | C22 | 20.5(9)   |
| N1 | C14 | C19 | C18 | 179.5(6)  | C13 | C12 | C21 | C26 | -161.2(6) |
| C1 | C2  | C3  | C4  | -1.0(10)  | C13 | C12 | C27 | S1  | -38.7(7)  |
| C1 | C6  | C7  | O2  | -180.0(6) | C14 | N1  | C13 | C11 | -3.4(7)   |
| C1 | C6  | C7  | C8  | -0.8(9)   | C14 | N1  | C13 | C12 | -180.0(7) |
| C1 | C9  | C10 | C8  | 1.2(8)    | C14 | C15 | C16 | C17 | 1.2(9)    |
| C1 | C9  | C10 | C11 | 176.0(6)  | C15 | C11 | C13 | N1  | 2.3(7)    |
| C2 | C1  | C6  | C5  | 1.7(9)    | C15 | C11 | C13 | C12 | 179.7(5)  |
| C2 | C1  | C6  | C7  | -179.5(6) | C15 | C14 | C19 | C18 | -1.5(10)  |
| C2 | C1  | C9  | O1  | -0.9(9)   | C15 | C16 | C17 | C18 | -0.8(10)  |
| C2 | C1  | C9  | C10 | 179.4(5)  | C16 | C17 | C18 | C19 | -0.9(10)  |
| C2 | C3  | C4  | C5  | 0.6(11)   | C17 | C18 | C19 | C14 | 2.0(10)   |
| C3 | C4  | C5  | C6  | 0.9(10)   | C19 | C14 | C15 | C11 | 179.1(6)  |
| C4 | C5  | C6  | C1  | -2.0(9)   | C19 | C14 | C15 | C16 | -0.1(9)   |
| C4 | C5  | C6  | C7  | 179.2(6)  | C20 | N1  | C13 | C11 | -178.9(6) |
| C5 | C6  | C7  | O2  | -1.2(10)  | C20 | N1  | C13 | C12 | 4.6(12)   |
| C5 | C6  | C7  | C8  | 178.0(6)  | C20 | N1  | C14 | C15 | 178.7(6)  |
| C6 | C1  | C2  | C3  | -0.2(9)   | C20 | N1  | C14 | C19 | -2.2(11)  |



**Table S12 Torsion Angles for 5.**

| A   | B   | C   | D   | Angle/°   | A   | B   | C   | D   | Angle/°   |
|-----|-----|-----|-----|-----------|-----|-----|-----|-----|-----------|
| C6  | C1  | C9  | O1  | 177.4(6)  | C21 | C12 | C13 | N1  | 62.5(10)  |
| C6  | C1  | C9  | C10 | -2.4(8)   | C21 | C12 | C13 | C11 | -114.1(6) |
| C6  | C7  | C8  | C10 | -0.4(9)   | C21 | C12 | C27 | S1  | -165.4(5) |
| C6  | C7  | C8  | C12 | -178.0(6) | C21 | C22 | C23 | C24 | 2.2(13)   |
| C7  | C8  | C10 | C9  | 0.1(9)    | C22 | C21 | C26 | C25 | -0.6(11)  |
| C7  | C8  | C10 | C11 | -175.5(6) | C22 | C23 | C24 | C25 | -4.0(13)  |
| C7  | C8  | C12 | C13 | 174.9(6)  | C23 | C24 | C25 | C26 | 3.6(12)   |
| C7  | C8  | C12 | C21 | -67.7(8)  | C24 | C25 | C26 | C21 | -1.2(11)  |
| C7  | C8  | C12 | C27 | 54.4(8)   | C26 | C21 | C22 | C23 | 0.2(11)   |
| C8  | C10 | C11 | C13 | -0.6(7)   | C27 | S1  | C28 | C29 | -76.4(6)  |
| C8  | C10 | C11 | C15 | 177.4(8)  | C27 | S1  | C28 | C32 | 103.3(6)  |
| C8  | C12 | C13 | N1  | 179.2(7)  | C27 | C12 | C13 | N1  | -62.9(9)  |
| C8  | C12 | C13 | C11 | 2.7(7)    | C27 | C12 | C13 | C11 | 120.5(6)  |
| C8  | C12 | C21 | C22 | -88.2(7)  | C27 | C12 | C21 | C22 | 148.7(6)  |
| C8  | C12 | C21 | C26 | 90.0(7)   | C27 | C12 | C21 | C26 | -33.0(8)  |
| C8  | C12 | C27 | S1  | 71.6(6)   | C28 | S1  | C27 | C12 | -56.4(6)  |
| C9  | C1  | C2  | C3  | 178.1(6)  | C28 | C29 | C30 | C31 | -0.8(11)  |
| C9  | C1  | C6  | C5  | -176.6(6) | C28 | C32 | C33 | C31 | -0.5(10)  |
| C9  | C1  | C6  | C7  | 2.2(9)    | C29 | C28 | C32 | C33 | 1.7(10)   |
| C9  | C10 | C11 | C13 | -175.9(6) | C29 | C30 | C31 | C33 | 2.0(10)   |
| C9  | C10 | C11 | C15 | 2.1(13)   | C29 | C30 | C31 | C34 | -178.7(7) |
| C10 | C8  | C12 | C13 | -3.0(7)   | C30 | C31 | C33 | C32 | -1.4(10)  |
| C10 | C8  | C12 | C21 | 114.4(6)  | C32 | C28 | C29 | C30 | -1.1(10)  |
| C10 | C8  | C12 | C27 | -123.5(6) | C34 | C31 | C33 | C32 | 179.4(6)  |

**Table S13 Hydrogen Atom Coordinates ( $\text{\AA} \times 10^4$ ) and Isotropic Displacement Parameters ( $\text{\AA}^2 \times 10^3$ ) for 5.**

| Atom | x       | y       | z       | U(eq) |
|------|---------|---------|---------|-------|
| H2   | 401.6   | 5605.21 | 6567.62 | 35    |
| H3   | 569.8   | 5191.55 | 8308.69 | 42    |
| H4   | 1783.88 | 4826.53 | 9385.91 | 39    |
| H5   | 2827.99 | 4899.55 | 8745.28 | 35    |
| H16  | 575.15  | 6243.78 | 2891.45 | 33    |
| H17  | 241.89  | 6401.5  | 1106.91 | 35    |
| H18  | 1159.41 | 6396.05 | 232.29  | 34    |
| H19  | 2444.14 | 6291.78 | 1109.85 | 39    |
| H20A | 4117.72 | 6211.34 | 3544.37 | 59    |

**Table S13 Hydrogen Atom Coordinates ( $\text{\AA}\times 10^4$ ) and Isotropic Displacement Parameters ( $\text{\AA}^2\times 10^3$ ) for 5.**

| <b>Atom</b> | <b>x</b> | <b>y</b> | <b>z</b> | <b>U(eq)</b> |
|-------------|----------|----------|----------|--------------|
| H20B        | 3677.75  | 6584.53  | 2390.51  | 59           |
| H20C        | 3776.66  | 5151.95  | 2716.81  | 59           |
| H22         | 3284.23  | 8056.72  | 4554.57  | 47           |
| H23         | 4032.33  | 9824.01  | 5107.46  | 57           |
| H24         | 5160.53  | 9658.08  | 6395.5   | 57           |
| H25         | 5480.14  | 7800.8   | 7291.5   | 56           |
| H26         | 4725.95  | 6016.26  | 6760.61  | 49           |
| H27A        | 4074.83  | 4355.06  | 6157.63  | 35           |
| H27B        | 4354.13  | 4687.77  | 5183.46  | 35           |
| H29         | 3234.67  | 2147.33  | 6623.94  | 41           |
| H30         | 2167.99  | 1776.64  | 7147.5   | 45           |
| H32         | 1916.83  | 3316.84  | 3853.73  | 37           |
| H33         | 840.49   | 2979.63  | 4389.89  | 39           |
| H34A        | 500.28   | 1321.94  | 5985.24  | 67           |
| H34B        | 318.04   | 2778.15  | 5885.47  | 67           |
| H34C        | 838.17   | 2222.48  | 6941.9   | 67           |

## 3.2 X-Ray Crystallographic Data of 41

Single crystals of  $C_{38}H_{33}NO_6S$  **41** were grown from ethyl acetate and PE. The ellipsoids are shown at 50% probability levels. A suitable crystal was selected and collected at 170.00 (10) K on a SuperNova, Dual, Cu at zero, AtlasS2 diffractometer. The data were collected and processed using CrysAlisPro. The structures were solved by direct methods using Olex2 software with the SHELXT structure solution program via intrinsic phasing algorithm, and the non-hydrogen atoms were located from the trial structure and then refined anisotropically with SHELXL-2018 using a full-matrix least squares procedure based on  $F^2$ . The weighted  $R$  factor,  $wR$  and goodness-of-fit  $S$  values were obtained based on  $F^2$ . The hydrogen atom positions were fixed geometrically at the calculated distances and allowed to ride on their parent atoms. Crystallographic data for the structure reported in this paper have been deposited at the Cambridge Crystallographic Data Center and allocated with the deposition numbers: CCDC 2322362 for compound **41**.

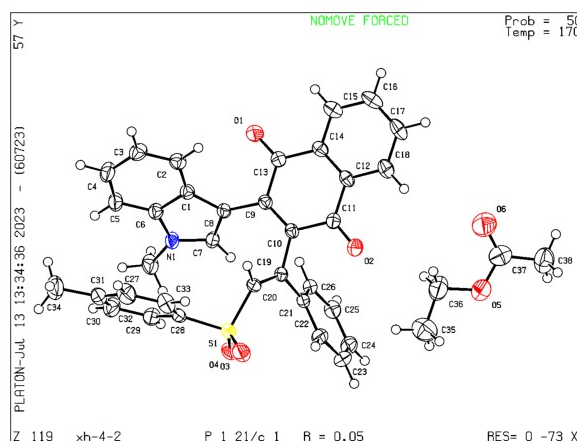

**Figure S1** ORTEP Drawing of **41**

(The ellipsoids are shown at 50% probability levels)

**Table S14** Crystal data and structure refinement for **41**.

|                     |                     |
|---------------------|---------------------|
| Identification code | 41                  |
| Empirical formula   | $C_{38}H_{33}NO_6S$ |
| Formula weight      | 631.71              |
| Temperature/K       | 170.00(10)          |
| Crystal system      | monoclinic          |
| Space group         | $P2_1/c$            |

|                                             |                                                                |
|---------------------------------------------|----------------------------------------------------------------|
| a/Å                                         | 8.4208(6)                                                      |
| b/Å                                         | 32.501(2)                                                      |
| c/Å                                         | 11.8454(8)                                                     |
| $\alpha$ /°                                 | 90                                                             |
| $\beta$ /°                                  | 104.606(7)                                                     |
| $\gamma$ /°                                 | 90                                                             |
| Volume/Å <sup>3</sup>                       | 3137.2(4)                                                      |
| Z                                           | 4                                                              |
| $\rho_{\text{calc}}$ /g/cm <sup>3</sup>     | 1.337                                                          |
| $\mu$ /mm <sup>-1</sup>                     | 0.154                                                          |
| F(000)                                      | 1328.0                                                         |
| Crystal size/mm <sup>3</sup>                | 0.15 × 0.14 × 0.12                                             |
| Radiation                                   | Mo K $\alpha$ ( $\lambda$ = 0.71073)                           |
| 2 $\Theta$ range for data collection/°      | 4.348 to 49.996                                                |
| Index ranges                                | -9 ≤ h ≤ 10, -38 ≤ k ≤ 35, -13 ≤ l ≤ 14                        |
| Reflections collected                       | 14125                                                          |
| Independent reflections                     | 5500 [ $R_{\text{int}}$ = 0.0315, $R_{\text{sigma}}$ = 0.0463] |
| Data/restraints/parameters                  | 5500/0/419                                                     |
| Goodness-of-fit on F <sup>2</sup>           | 1.017                                                          |
| Final R indexes [ $I \geq 2\sigma(I)$ ]     | $R_1 = 0.0511$ , $wR_2 = 0.1157$                               |
| Final R indexes [all data]                  | $R_1 = 0.0672$ , $wR_2 = 0.1253$                               |
| Largest diff. peak/hole / e Å <sup>-3</sup> | 0.41/-0.40                                                     |

### Crystal structure determination of 41

**Crystal Data** for C<sub>38</sub>H<sub>33</sub>NO<sub>6</sub>S ( $M = 631.71$  g/mol): monoclinic, space group P2<sub>1</sub>/c (no. 14),  $a = 8.4208(6)$  Å,  $b = 32.501(2)$  Å,  $c = 11.8454(8)$  Å,  $\beta = 104.606(7)^\circ$ ,  $V = 3137.2(4)$  Å<sup>3</sup>,  $Z = 4$ ,  $T = 170.00(10)$  K,  $\mu(\text{Mo K}\alpha) = 0.154$  mm<sup>-1</sup>,  $D_{\text{calc}} = 1.337$  g/cm<sup>3</sup>, 14125 reflections measured ( $4.348^\circ \leq 2\Theta \leq 49.996^\circ$ ), 5500 unique ( $R_{\text{int}} = 0.0315$ ,  $R_{\text{sigma}} = 0.0463$ ) which were used in all calculations. The final  $R_1$  was 0.0511 ( $I > 2\sigma(I)$ ) and  $wR_2$  was 0.1253 (all data).

### Refinement model description

**Table S15 Fractional Atomic Coordinates ( $\times 10^4$ ) and Equivalent Isotropic Displacement Parameters ( $\text{\AA}^2 \times 10^3$ ) for 41.  $U_{\text{eq}}$  is defined as 1/3 of the trace of the orthogonalised  $U_{ij}$  tensor.**

| Atom | x         | y         | z          | U(eq)     |
|------|-----------|-----------|------------|-----------|
| S1   | 7244.5(7) | 3336.9(2) | 5419.5(5)  | 27.35(16) |
| O1   | 2472(2)   | 4335.7(6) | 8513.1(16) | 50.0(5)   |
| O2   | 3746(2)   | 4618.2(5) | 4406.3(15) | 39.9(5)   |
| O3   | 8487(2)   | 3489.9(6) | 4894.1(16) | 44.2(5)   |

**Table S15 Fractional Atomic Coordinates ( $\times 10^4$ ) and Equivalent Isotropic Displacement Parameters ( $\text{\AA}^2 \times 10^3$ ) for 41.  $U_{\text{eq}}$  is defined as 1/3 of the trace of the orthogonalised  $U_{ij}$  tensor.**

| Atom | x        | y          | z          | U(eq)    |
|------|----------|------------|------------|----------|
| O4   | 6150(2)  | 3027.2(5)  | 4806.7(14) | 38.4(4)  |
| N1   | 4134(2)  | 3005.9(6)  | 7959.8(16) | 31.1(5)  |
| C1   | 4817(3)  | 3622.0(7)  | 8822.4(19) | 25.3(5)  |
| C2   | 5581(3)  | 3878.6(8)  | 9753(2)    | 30.5(5)  |
| C3   | 6395(3)  | 3703.3(8)  | 10793(2)   | 35.2(6)  |
| C4   | 6480(3)  | 3276.1(8)  | 10936(2)   | 39.4(6)  |
| C5   | 5754(3)  | 3015.8(8)  | 10046(2)   | 35.3(6)  |
| C6   | 4926(3)  | 3194.0(7)  | 8993.1(19) | 28.1(5)  |
| C7   | 3564(3)  | 3303.1(7)  | 7156(2)    | 28.9(5)  |
| C8   | 3936(3)  | 3687.5(7)  | 7622.1(19) | 24.8(5)  |
| C9   | 3534(3)  | 4079.7(7)  | 6993.9(18) | 23.9(5)  |
| C10  | 3805(3)  | 4155.8(7)  | 5929.2(18) | 22.9(5)  |
| C11  | 3372(3)  | 4555.3(7)  | 5323.0(19) | 26.6(5)  |
| C12  | 2534(3)  | 4870.1(7)  | 5864(2)    | 26.9(5)  |
| C13  | 2726(3)  | 4402.2(8)  | 7562(2)    | 29.1(5)  |
| C14  | 2218(3)  | 4794.7(7)  | 6947(2)    | 27.9(5)  |
| C15  | 1412(3)  | 5087.5(8)  | 7448(2)    | 37.4(6)  |
| C16  | 926(3)   | 5452.9(8)  | 6870(3)    | 43.1(7)  |
| C17  | 1255(3)  | 5531.4(8)  | 5803(3)    | 43.2(7)  |
| C18  | 2060(3)  | 5241.1(8)  | 5300(2)    | 36.1(6)  |
| C19  | 4579(3)  | 3847.8(7)  | 5300.6(18) | 23.2(5)  |
| C20  | 6135(3)  | 3750.1(7)  | 5782.9(19) | 24.2(5)  |
| C21  | 3503(3)  | 3692.4(7)  | 4186.4(19) | 24.1(5)  |
| C22  | 4055(3)  | 3660.2(8)  | 3180(2)    | 31.9(6)  |
| C23  | 2988(3)  | 3542.9(8)  | 2137(2)    | 38.1(6)  |
| C24  | 1371(3)  | 3454.1(8)  | 2091(2)    | 37.2(6)  |
| C25  | 811(3)   | 3481.8(8)  | 3083(2)    | 32.7(6)  |
| C26  | 1864(3)  | 3605.3(7)  | 4124.5(19) | 27.2(5)  |
| C27  | 3814(4)  | 2568.5(8)  | 7803(2)    | 42.4(7)  |
| C28  | 8236(3)  | 3138.2(7)  | 6805.9(19) | 26.8(5)  |
| C29  | 7641(3)  | 2783.3(8)  | 7184(2)    | 34.8(6)  |
| C30  | 8478(4)  | 2606.9(8)  | 8233(2)    | 42.6(7)  |
| C31  | 9894(3)  | 2786.4(9)  | 8903(2)    | 41.8(7)  |
| C32  | 10433(3) | 3150.1(9)  | 8524(2)    | 44.4(7)  |
| C33  | 9620(3)  | 3328.6(8)  | 7480(2)    | 37.1(6)  |
| C34  | 10822(5) | 2583.3(10) | 10019(3)   | 66.5(10) |

**Table S15 Fractional Atomic Coordinates ( $\times 10^4$ ) and Equivalent Isotropic Displacement Parameters ( $\text{\AA}^2 \times 10^3$ ) for 41.  $U_{\text{eq}}$  is defined as 1/3 of the trace of the orthogonalised  $U_{ij}$  tensor.**

| Atom | x       | y          | z          | U(eq)   |
|------|---------|------------|------------|---------|
| O5   | 2083(3) | 5226.5(7)  | 954.7(17)  | 55.5(5) |
| O6   | 1577(3) | 5671.2(7)  | 2232.0(19) | 69.1(7) |
| C35  | 4105(4) | 4707.9(11) | 1420(3)    | 65.8(9) |
| C36  | 3108(4) | 4997.0(11) | 1920(3)    | 59.9(9) |
| C37  | 1392(4) | 5560.2(10) | 1248(3)    | 48.0(7) |
| C38  | 351(4)  | 5774.2(11) | 200(3)     | 61.9(9) |

**Table S16 Anisotropic Displacement Parameters ( $\text{\AA}^2 \times 10^3$ ) for 41. The Anisotropic displacement factor exponent takes the form:  $-2\pi^2[h^2a^2U_{11}+2hka*b*U_{12}+\dots]$ .**

| Atom | $U_{11}$ | $U_{22}$ | $U_{33}$ | $U_{23}$ | $U_{13}$ | $U_{12}$ |
|------|----------|----------|----------|----------|----------|----------|
| S1   | 31.5(3)  | 22.4(3)  | 29.0(3)  | 0.1(3)   | 9.2(2)   | 4.6(2)   |
| O1   | 66.9(13) | 50.9(13) | 41.0(11) | 12.2(10) | 30.2(10) | 26.0(10) |
| O2   | 58.5(12) | 31.1(10) | 33.7(10) | 8.8(8)   | 18.2(9)  | 7.3(8)   |
| O3   | 46.3(11) | 42.7(11) | 52.9(11) | 14.2(9)  | 29.6(9)  | 12.4(9)  |
| O4   | 50.9(11) | 24.2(9)  | 33.4(9)  | -6.7(8)  | -1.8(8)  | 5.9(8)   |
| N1   | 43.0(12) | 20.4(11) | 25.8(10) | 1.7(9)   | 1.2(9)   | 0.5(9)   |
| C1   | 25.3(12) | 25.0(13) | 26.1(12) | 1.9(10)  | 7.1(10)  | 0.4(10)  |
| C2   | 32.7(13) | 25.4(13) | 34.3(13) | -0.9(11) | 10.2(11) | -2.3(11) |
| C3   | 39.6(15) | 35.9(15) | 27.6(13) | -4.8(11) | 3.9(11)  | -6.1(12) |
| C4   | 44.6(16) | 40.1(16) | 27.8(13) | 6.4(12)  | -1.5(11) | 1.2(13)  |
| C5   | 44.2(15) | 27.2(14) | 30.5(13) | 5.2(11)  | 2.1(11)  | 2.0(11)  |
| C6   | 31.1(13) | 25.3(13) | 26.9(12) | 1.5(10)  | 5.3(10)  | -0.6(10) |
| C7   | 36.7(14) | 25.4(13) | 22.4(11) | 2.9(10)  | 3.2(10)  | 1.6(10)  |
| C8   | 27.5(12) | 23.0(13) | 25.2(12) | 2.9(10)  | 9.1(10)  | 2.0(10)  |
| C9   | 25.2(12) | 21.4(12) | 24.4(12) | -0.2(10) | 4.6(9)   | 0.5(9)   |
| C10  | 23.9(12) | 17.9(12) | 25.0(11) | -0.8(9)  | 2.6(9)   | -0.7(9)  |
| C11  | 28.4(12) | 25.0(13) | 24.9(12) | 1.6(10)  | 4.0(10)  | -1.2(10) |
| C12  | 24.5(12) | 19.3(12) | 34.9(13) | -0.8(10) | 3.7(10)  | -0.1(10) |
| C13  | 30.7(13) | 28.5(14) | 28.7(13) | 2.3(11)  | 8.5(10)  | 3.7(10)  |
| C14  | 26.3(12) | 23.2(13) | 33.3(13) | -3.1(11) | 5.8(10)  | 0.7(10)  |
| C15  | 37.7(14) | 29.4(15) | 46.3(15) | -4.4(12) | 12.9(12) | 3.4(12)  |
| C16  | 42.8(16) | 25.5(14) | 62.9(18) | -8.7(14) | 17.0(14) | 5.5(12)  |
| C17  | 44.3(16) | 20.6(14) | 64.5(19) | 7.8(13)  | 13.3(14) | 6.6(12)  |
| C18  | 38.0(14) | 25.4(14) | 44.8(15) | 5.9(12)  | 10.4(12) | 2.1(11)  |
| C19  | 27.1(12) | 19.5(12) | 24.0(11) | 3.5(10)  | 8.5(10)  | 0.7(9)   |

**Table S16 Anisotropic Displacement Parameters ( $\text{\AA}^2 \times 10^3$ ) for 41. The Anisotropic displacement factor exponent takes the form:  $-2\pi^2[h^2a^{*2}U_{11}+2hka^*b^*U_{12}+\dots]$ .**

| Atom | $U_{11}$ | $U_{22}$ | $U_{33}$ | $U_{23}$  | $U_{13}$  | $U_{12}$  |
|------|----------|----------|----------|-----------|-----------|-----------|
| C20  | 30.8(13) | 16.7(12) | 24.7(12) | -2.4(9)   | 6.1(10)   | -0.7(9)   |
| C21  | 26.2(12) | 20.7(12) | 23.9(12) | 2.1(10)   | 3.7(9)    | 3.4(9)    |
| C22  | 31.6(13) | 36.4(15) | 28.1(13) | 1.0(11)   | 8.6(10)   | 2.6(11)   |
| C23  | 48.6(16) | 42.0(16) | 24.3(13) | -2.2(12)  | 10.5(12)  | 4.6(13)   |
| C24  | 42.3(16) | 35.7(15) | 27.8(13) | -4.1(11)  | -2.0(11)  | 1.3(12)   |
| C25  | 29.6(13) | 30.3(14) | 35.1(14) | -0.5(11)  | 2.7(11)   | -2.0(11)  |
| C26  | 30.2(13) | 26.6(13) | 24.7(12) | 1.7(10)   | 6.7(10)   | 5.1(10)   |
| C27  | 59.8(18) | 21.3(14) | 38.8(15) | -0.3(12)  | -0.9(13)  | -2.0(12)  |
| C28  | 27.6(12) | 22.9(13) | 30.6(12) | -0.8(10)  | 8.8(10)   | 4.9(10)   |
| C29  | 41.8(15) | 28.0(14) | 31.9(13) | -3.3(11)  | 4.4(11)   | -4.6(11)  |
| C30  | 62.5(18) | 29.6(15) | 33.3(14) | 1.7(12)   | 7.5(13)   | -2.1(13)  |
| C31  | 52.0(17) | 35.2(16) | 33.1(14) | -1.9(12)  | 1.4(13)   | 15.0(13)  |
| C32  | 32.0(14) | 45.1(18) | 47.6(16) | -5.8(14)  | -5.8(12)  | 1.7(13)   |
| C33  | 29.1(14) | 30.3(15) | 49.6(16) | 2.4(12)   | 5.5(12)   | -2.0(11)  |
| C34  | 89(3)    | 52(2)    | 43.5(17) | 1.8(16)   | -12.1(17) | 19.2(18)  |
| O5   | 68.7(14) | 55.3(14) | 41.1(11) | 3.4(10)   | 11.3(10)  | 4.9(11)   |
| O6   | 83.2(17) | 59.7(16) | 54.4(14) | -14.0(12) | -1.2(12)  | -6.5(13)  |
| C35  | 57(2)    | 63(2)    | 74(2)    | -13.2(19) | 8.5(18)   | 0.6(17)   |
| C36  | 67(2)    | 63(2)    | 45.3(18) | 10.8(16)  | 5.4(16)   | 3.2(17)   |
| C37  | 52.5(18) | 44.0(18) | 49.6(18) | -7.4(15)  | 16.6(14)  | -16.8(15) |
| C38  | 54(2)    | 74(2)    | 59(2)    | 20.7(18)  | 16.9(16)  | 6.0(17)   |

**Table S17 Bond Lengths for 41.**

| Atom | Atom | Length/ $\text{\AA}$ | Atom | Atom | Length/ $\text{\AA}$ |
|------|------|----------------------|------|------|----------------------|
| S1   | O3   | 1.4346(18)           | C13  | C14  | 1.478(3)             |
| S1   | O4   | 1.4327(18)           | C14  | C15  | 1.386(3)             |
| S1   | C20  | 1.750(2)             | C15  | C16  | 1.380(4)             |
| S1   | C28  | 1.766(2)             | C16  | C17  | 1.384(4)             |
| O1   | C13  | 1.218(3)             | C17  | C18  | 1.382(4)             |
| O2   | C11  | 1.222(3)             | C19  | C20  | 1.330(3)             |
| N1   | C6   | 1.380(3)             | C19  | C21  | 1.488(3)             |
| N1   | C7   | 1.356(3)             | C21  | C22  | 1.389(3)             |
| N1   | C27  | 1.450(3)             | C21  | C26  | 1.392(3)             |
| C1   | C2   | 1.402(3)             | C22  | C23  | 1.385(3)             |
| C1   | C6   | 1.405(3)             | C23  | C24  | 1.380(4)             |
| C1   | C8   | 1.444(3)             | C24  | C25  | 1.375(3)             |

**Table S17 Bond Lengths for 41.**

| Atom | Atom | Length/Å | Atom | Atom | Length/Å |
|------|------|----------|------|------|----------|
| C2   | C3   | 1.374(3) | C25  | C26  | 1.385(3) |
| C3   | C4   | 1.399(4) | C28  | C29  | 1.377(3) |
| C4   | C5   | 1.370(4) | C28  | C33  | 1.382(3) |
| C5   | C6   | 1.392(3) | C29  | C30  | 1.388(3) |
| C7   | C8   | 1.370(3) | C30  | C31  | 1.384(4) |
| C8   | C9   | 1.472(3) | C31  | C32  | 1.381(4) |
| C9   | C10  | 1.360(3) | C31  | C34  | 1.508(4) |
| C9   | C13  | 1.499(3) | C32  | C33  | 1.381(4) |
| C10  | C11  | 1.484(3) | O5   | C36  | 1.453(3) |
| C10  | C19  | 1.492(3) | O5   | C37  | 1.318(4) |
| C11  | C12  | 1.477(3) | O6   | C37  | 1.192(3) |
| C12  | C14  | 1.396(3) | C35  | C36  | 1.480(5) |
| C12  | C18  | 1.388(3) | C37  | C38  | 1.498(4) |

**Table S18 Bond Angles for 41.**

| Atom | Atom | Atom | Angle/°    | Atom | Atom | Atom | Angle/°    |
|------|------|------|------------|------|------|------|------------|
| O3   | S1   | C20  | 109.50(11) | O1   | C13  | C14  | 120.8(2)   |
| O3   | S1   | C28  | 107.72(11) | C14  | C13  | C9   | 119.4(2)   |
| O4   | S1   | O3   | 118.05(12) | C12  | C14  | C13  | 120.4(2)   |
| O4   | S1   | C20  | 110.39(11) | C15  | C14  | C12  | 120.0(2)   |
| O4   | S1   | C28  | 107.89(11) | C15  | C14  | C13  | 119.6(2)   |
| C20  | S1   | C28  | 102.03(10) | C16  | C15  | C14  | 119.7(3)   |
| C6   | N1   | C27  | 125.50(19) | C15  | C16  | C17  | 120.6(2)   |
| C7   | N1   | C6   | 108.25(19) | C18  | C17  | C16  | 120.1(2)   |
| C7   | N1   | C27  | 125.9(2)   | C17  | C18  | C12  | 119.9(2)   |
| C2   | C1   | C6   | 118.4(2)   | C20  | C19  | C10  | 116.9(2)   |
| C2   | C1   | C8   | 134.9(2)   | C20  | C19  | C21  | 127.9(2)   |
| C6   | C1   | C8   | 106.6(2)   | C21  | C19  | C10  | 115.19(18) |
| C3   | C2   | C1   | 119.0(2)   | C19  | C20  | S1   | 127.38(18) |
| C2   | C3   | C4   | 121.3(2)   | C22  | C21  | C19  | 121.7(2)   |
| C5   | C4   | C3   | 121.4(2)   | C22  | C21  | C26  | 118.8(2)   |
| C4   | C5   | C6   | 117.3(2)   | C26  | C21  | C19  | 119.31(19) |
| N1   | C6   | C1   | 108.16(19) | C23  | C22  | C21  | 120.2(2)   |
| N1   | C6   | C5   | 129.1(2)   | C24  | C23  | C22  | 120.3(2)   |
| C5   | C6   | C1   | 122.7(2)   | C25  | C24  | C23  | 120.0(2)   |
| N1   | C7   | C8   | 111.2(2)   | C24  | C25  | C26  | 120.0(2)   |
| C1   | C8   | C9   | 128.4(2)   | C25  | C26  | C21  | 120.6(2)   |



**Table S18 Bond Angles for 41.**

| Atom | Atom | Atom | Angle/°    | Atom | Atom | Atom | Angle/°    |
|------|------|------|------------|------|------|------|------------|
| C7   | C8   | C1   | 105.7(2)   | C29  | C28  | S1   | 118.91(18) |
| C7   | C8   | C9   | 125.9(2)   | C29  | C28  | C33  | 120.7(2)   |
| C8   | C9   | C13  | 116.82(19) | C33  | C28  | S1   | 120.39(19) |
| C10  | C9   | C8   | 123.8(2)   | C28  | C29  | C30  | 119.6(2)   |
| C10  | C9   | C13  | 119.4(2)   | C31  | C30  | C29  | 120.6(3)   |
| C9   | C10  | C11  | 122.0(2)   | C30  | C31  | C34  | 120.0(3)   |
| C9   | C10  | C19  | 122.5(2)   | C32  | C31  | C30  | 118.8(2)   |
| C11  | C10  | C19  | 115.50(18) | C32  | C31  | C34  | 121.3(3)   |
| O2   | C11  | C10  | 119.3(2)   | C31  | C32  | C33  | 121.4(2)   |
| O2   | C11  | C12  | 121.9(2)   | C32  | C33  | C28  | 119.0(2)   |
| C12  | C11  | C10  | 118.81(19) | C37  | O5   | C36  | 115.4(2)   |
| C14  | C12  | C11  | 120.0(2)   | O5   | C36  | C35  | 107.2(3)   |
| C18  | C12  | C11  | 120.2(2)   | O5   | C37  | C38  | 111.6(3)   |
| C18  | C12  | C14  | 119.8(2)   | O6   | C37  | O5   | 123.3(3)   |
| O1   | C13  | C9   | 119.8(2)   | O6   | C37  | C38  | 125.1(3)   |

**Table S19 Torsion Angles for 41.**

| A  | B   | C   | D   | Angle/°     | A   | B   | C   | D   | Angle/°    |
|----|-----|-----|-----|-------------|-----|-----|-----|-----|------------|
| S1 | C28 | C29 | C30 | 175.28(19)  | C10 | C11 | C12 | C18 | -177.7(2)  |
| S1 | C28 | C33 | C32 | -175.59(19) | C10 | C19 | C20 | S1  | 166.82(17) |
| O1 | C13 | C14 | C12 | 179.1(2)    | C10 | C19 | C21 | C22 | 134.4(2)   |
| O1 | C13 | C14 | C15 | -1.4(4)     | C10 | C19 | C21 | C26 | -40.8(3)   |
| O2 | C11 | C12 | C14 | -176.1(2)   | C11 | C10 | C19 | C20 | 113.2(2)   |
| O2 | C11 | C12 | C18 | 3.9(3)      | C11 | C10 | C19 | C21 | -65.7(3)   |
| O3 | S1  | C20 | C19 | 111.6(2)    | C11 | C12 | C14 | C13 | 0.4(3)     |
| O3 | S1  | C28 | C29 | -141.17(19) | C11 | C12 | C14 | C15 | -179.1(2)  |
| O3 | S1  | C28 | C33 | 36.6(2)     | C11 | C12 | C18 | C17 | 179.0(2)   |
| O4 | S1  | C20 | C19 | -20.0(2)    | C12 | C14 | C15 | C16 | 0.0(4)     |
| O4 | S1  | C28 | C29 | -12.7(2)    | C13 | C9  | C10 | C11 | 2.0(3)     |
| O4 | S1  | C28 | C33 | 165.09(19)  | C13 | C9  | C10 | C19 | -179.0(2)  |
| N1 | C7  | C8  | C1  | 0.1(3)      | C13 | C14 | C15 | C16 | -179.5(2)  |
| N1 | C7  | C8  | C9  | 178.7(2)    | C14 | C12 | C18 | C17 | -1.0(4)    |
| C1 | C2  | C3  | C4  | 0.3(4)      | C14 | C15 | C16 | C17 | -0.8(4)    |
| C1 | C8  | C9  | C10 | 131.3(2)    | C15 | C16 | C17 | C18 | 0.7(4)     |
| C1 | C8  | C9  | C13 | -51.0(3)    | C16 | C17 | C18 | C12 | 0.2(4)     |
| C2 | C1  | C6  | N1  | -178.3(2)   | C18 | C12 | C14 | C13 | -179.6(2)  |
| C2 | C1  | C6  | C5  | 0.2(3)      | C18 | C12 | C14 | C15 | 0.9(3)     |

**Table S19 Torsion Angles for 41.**

| A   | B   | C   | D   | Angle/°   | A   | B   | C   | D   | Angle/°    |
|-----|-----|-----|-----|-----------|-----|-----|-----|-----|------------|
| C2  | C1  | C8  | C7  | 177.3(2)  | C19 | C10 | C11 | O2  | -4.2(3)    |
| C2  | C1  | C8  | C9  | -1.3(4)   | C19 | C10 | C11 | C12 | 177.33(19) |
| C2  | C3  | C4  | C5  | -0.1(4)   | C19 | C21 | C22 | C23 | -175.3(2)  |
| C3  | C4  | C5  | C6  | -0.1(4)   | C19 | C21 | C26 | C25 | 176.4(2)   |
| C4  | C5  | C6  | N1  | 178.2(2)  | C20 | S1  | C28 | C29 | 103.6(2)   |
| C4  | C5  | C6  | C1  | 0.0(4)    | C20 | S1  | C28 | C33 | -78.6(2)   |
| C6  | N1  | C7  | C8  | -0.6(3)   | C20 | C19 | C21 | C22 | -44.4(3)   |
| C6  | C1  | C2  | C3  | -0.4(3)   | C20 | C19 | C21 | C26 | 140.4(2)   |
| C6  | C1  | C8  | C7  | 0.5(3)    | C21 | C19 | C20 | S1  | -14.4(4)   |
| C6  | C1  | C8  | C9  | -178.1(2) | C21 | C22 | C23 | C24 | -0.5(4)    |
| C7  | N1  | C6  | C1  | 0.9(3)    | C22 | C21 | C26 | C25 | 1.1(3)     |
| C7  | N1  | C6  | C5  | -177.5(2) | C22 | C23 | C24 | C25 | 0.0(4)     |
| C7  | C8  | C9  | C10 | -47.0(3)  | C23 | C24 | C25 | C26 | 1.0(4)     |
| C7  | C8  | C9  | C13 | 130.6(2)  | C24 | C25 | C26 | C21 | -1.6(4)    |
| C8  | C1  | C2  | C3  | -176.9(2) | C26 | C21 | C22 | C23 | -0.1(4)    |
| C8  | C1  | C6  | N1  | -0.8(3)   | C27 | N1  | C6  | C1  | -173.0(2)  |
| C8  | C1  | C6  | C5  | 177.7(2)  | C27 | N1  | C6  | C5  | 8.7(4)     |
| C8  | C9  | C10 | C11 | 179.6(2)  | C27 | N1  | C7  | C8  | 173.2(2)   |
| C8  | C9  | C10 | C19 | -1.4(3)   | C28 | S1  | C20 | C19 | -134.4(2)  |
| C8  | C9  | C13 | O1  | 1.9(3)    | C28 | C29 | C30 | C31 | 0.5(4)     |
| C8  | C9  | C13 | C14 | -177.0(2) | C29 | C28 | C33 | C32 | 2.2(4)     |
| C9  | C10 | C11 | O2  | 174.9(2)  | C29 | C30 | C31 | C32 | 1.8(4)     |
| C9  | C10 | C11 | C12 | -3.6(3)   | C29 | C30 | C31 | C34 | -177.9(3)  |
| C9  | C10 | C19 | C20 | -65.8(3)  | C30 | C31 | C32 | C33 | -2.1(4)    |
| C9  | C10 | C19 | C21 | 115.2(2)  | C31 | C32 | C33 | C28 | 0.2(4)     |
| C9  | C13 | C14 | C12 | -2.0(3)   | C33 | C28 | C29 | C30 | -2.5(4)    |
| C9  | C13 | C14 | C15 | 177.5(2)  | C34 | C31 | C32 | C33 | 177.5(3)   |
| C10 | C9  | C13 | O1  | 179.7(2)  | C36 | O5  | C37 | O6  | -0.1(4)    |
| C10 | C9  | C13 | C14 | 0.8(3)    | C36 | O5  | C37 | C38 | -179.6(3)  |
| C10 | C11 | C12 | C14 | 2.3(3)    | C37 | O5  | C36 | C35 | -165.1(3)  |

**Table S20 Hydrogen Atom Coordinates ( $\text{\AA} \times 10^4$ ) and Isotropic Displacement Parameters ( $\text{\AA}^2 \times 10^3$ ) for 41.**

| Atom | x       | y       | z        | U(eq) |
|------|---------|---------|----------|-------|
| H2   | 5536.74 | 4169.24 | 9664.9   | 37    |
| H3   | 6910.37 | 3875.63 | 11427.85 | 42    |
| H4   | 7053.07 | 3163.99 | 11665.96 | 47    |

**Table S20 Hydrogen Atom Coordinates ( $\text{\AA}\times 10^4$ ) and Isotropic Displacement Parameters ( $\text{\AA}^2\times 10^3$ ) for 41.**

| Atom | x        | y       | z        | U(eq) |
|------|----------|---------|----------|-------|
| H5   | 5812.74  | 2725.54 | 10142.42 | 42    |
| H7   | 2982.15  | 3251.37 | 6371.49  | 35    |
| H15  | 1195.03  | 5036.99 | 8184.4   | 45    |
| H16  | 361.32   | 5652.27 | 7208.35  | 52    |
| H17  | 925.91   | 5785.12 | 5416.47  | 52    |
| H18  | 2289.46  | 5295.43 | 4568.57  | 43    |
| H20  | 6710.41  | 3924.25 | 6394.15  | 29    |
| H22  | 5169.27  | 3718.79 | 3206.4   | 38    |
| H23  | 3371.7   | 3523.41 | 1450.52  | 46    |
| H24  | 644.07   | 3373.77 | 1373.56  | 45    |
| H25  | -298.45  | 3416.34 | 3054.04  | 39    |
| H26  | 1465.18  | 3630.7  | 4803.28  | 33    |
| H27A | 4656.91  | 2414.72 | 8366.72  | 64    |
| H27B | 3837.87  | 2489.03 | 7009.02  | 64    |
| H27C | 2732.02  | 2506.01 | 7926.29  | 64    |
| H29  | 6664.68  | 2660.1  | 6730.97  | 42    |
| H30  | 8074.54  | 2360.82 | 8492.81  | 51    |
| H32  | 11383.29 | 3280.23 | 8992     | 53    |
| H33  | 10006.18 | 3578.57 | 7229.61  | 45    |
| H34A | 10206.34 | 2615.23 | 10614.4  | 100   |
| H34B | 11902.06 | 2712.63 | 10291.43 | 100   |
| H34C | 10959.81 | 2289.92 | 9877.76  | 100   |
| H35A | 3378.41  | 4517.93 | 886.13   | 99    |
| H35B | 4832.63  | 4551.45 | 2050.15  | 99    |
| H35C | 4764.85  | 4862.79 | 992.37   | 99    |
| H36A | 2418.35  | 4843.87 | 2340.86  | 72    |
| H36B | 3829.5   | 5186.68 | 2475.29  | 72    |
| H38A | 1057.98  | 5921.84 | -206.13  | 93    |
| H38B | -378.65  | 5970.06 | 447.94   | 93    |
| H38C | -306.53  | 5570.57 | -327.38  | 93    |

#### 4. Characterization of compounds

**5-methyl-6-phenyl-6-(tosylmethyl)-5,6-dihydrobenzo[5,6]indeno[2,1-*b*]indole-7,12-dione (5)**

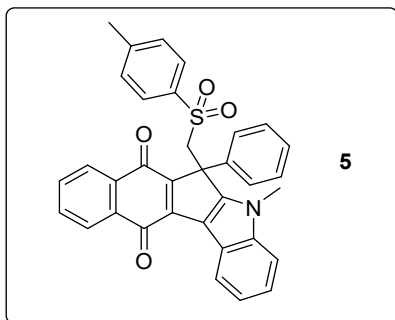

Blue solid, m.p. 243-244 °C, yield: 60.8 mg, 56% yield; Rf: 0.37 (EA:PE =1:3). <sup>1</sup>H NMR (400 MHz, CDCl<sub>3</sub>) δ 8.5 (dd, *J* = 5.5, 2.7 Hz, 1H), 8.0 (d, *J* = 8.9 Hz, 1H), 7.9 (d, *J* = 9.0 Hz, 1H), 7.7 – 7.6 (m, 2H), 7.4 (s, 3H), 7.2 (d, *J* = 6.5 Hz, 5H), 7.1 (dd, *J* = 6.4, 3.2 Hz, 2H), 6.7 (d, *J* = 7.9 Hz, 2H), 5.5 (d, *J* = 14.5 Hz, 1H), 4.4 (d, *J* = 14.5 Hz, 1H), 3.6 (s, 3H), 1.9 (s, 3H). <sup>13</sup>C NMR (101 MHz, CDCl<sub>3</sub>) 182.6, 178.7, 157.0, 146.5, 145.3, 143.0, 142.2, 136.2, 134.4, 134.1, 133.7, 132.2, 132.1, 129.3, 129.1, 128.5, 128.3, 125.8, 125.7, 125.6, 123.7, 122.7, 122.4, 121.7, 118.3, 110.6, 58.2, 52.5, 31.9, 21.2. HRMS (ESI) Calcd for C<sub>34</sub>H<sub>25</sub>NNaO<sub>4</sub>S<sup>+</sup>[M+Na]<sup>+</sup>: 566.1402, Found: 566.1401.

**5,8,11-trimethyl-6-phenyl-6-(tosylmethyl)-5,6-dihydrobenzo[5,6]indeno[2,1-b]indole-7,12-dione (6)**

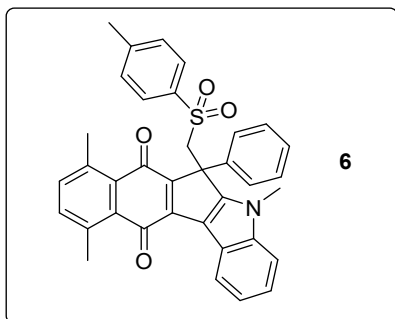

Purple solid, m.p. 260-261 °C, yield: 68.5 mg, 60% yield; Rf: 0.51 (EA:PE =1:3). <sup>1</sup>H NMR (400 MHz, CDCl<sub>3</sub>) δ 8.5 – 8.4 (m, 1H), 7.4 – 7.3 (m, 3H), 7.3 – 7.2 (m, 7H), 7.1 – 7.0 (m, 2H), 6.7 (d, *J* = 8.0 Hz, 2H), 5.5 (d, *J* = 14.6 Hz, 1H), 4.4 (d, *J* = 14.5 Hz, 1H), 3.6 (s, 3H), 2.8 (s, 3H), 2.6 (s, 3H), 1.9 (s, 3H). <sup>13</sup>C NMR (101 MHz, CDCl<sub>3</sub>) 185.0, 181.7, 156.3, 146.4, 145.1, 142.8, 142.3, 139.6, 139.3, 137.6, 136.6, 136.0, 134.7, 134.7, 132.7, 131.2, 129.2, 128.9, 128.4, 128.1, 125.7, 123.3, 122.7, 122.0, 121.9, 117.8, 110.4, 58.1, 52.4, 31.6, 23.8, 23.7, 21.1. HRMS (ESI) Calcd for C<sub>36</sub>H<sub>29</sub>NNaO<sub>4</sub>S<sup>+</sup>[M+Na]<sup>+</sup>: 594.1715, Found: 594.1719.

**5,9,10-trimethyl-6-phenyl-6-(tosylmethyl)-5,6-dihydrobenzo[5,6]indeno[2,1-*b*]indole-7,12-dione (7)**

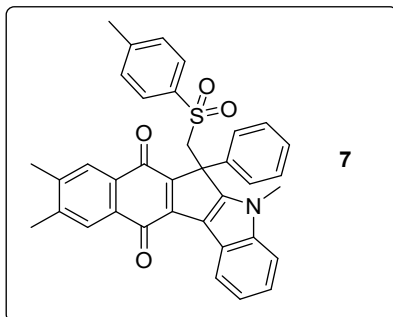

Blue solid, m.p. 229-230 °C, yield: 48.0 mg, 42% yield; Rf: 0.34 (EA:PE =1:3). <sup>1</sup>H NMR (400 MHz, CDCl<sub>3</sub>) δ 8.4 (dt, *J* = 4.9, 2.3 Hz, 1H), 7.8 (s, 1H), 7.6 (s, 1H), 7.4 (d, *J* = 2.7 Hz, 3H), 7.2 (q, *J* = 4.3, 3.6 Hz, 5H), 7.1 (dd, *J* = 6.6, 3.2 Hz, 2H), 6.7 (d, *J* = 7.9 Hz, 2H), 5.5 (d, *J* = 14.5 Hz, 1H), 4.4 (d, *J* = 14.5 Hz, 1H), 3.6 (s, 3H), 2.4 (d, *J* = 6.5 Hz, 6H), 1.9 (s, 3H). <sup>13</sup>C NMR (101 MHz, CDCl<sub>3</sub>) 182.8, 179.2, 156.7, 145.0, 143.3, 142.9, 141.5, 136.3, 130.1, 129.2, 129.0, 128.5, 128.2, 127.0, 126.8, 125.7, 123.6, 122.7, 122.2, 121.8, 118.6, 110.5, 58.2, 52.4, 31.8, 21.1, 20.2, 19.9. HRMS (ESI) Calcd for C<sub>36</sub>H<sub>29</sub>NNaO<sub>4</sub>S<sup>+</sup>[M+Na]<sup>+</sup>: 594.1715, Found: 594.1718.

**9,10-dibromo-5-methyl-6-phenyl-6-(tosylmethyl)-5,6-dihydrobenzo[5,6]indeno[2,1-*b*]indole-7,12-dione (8)**

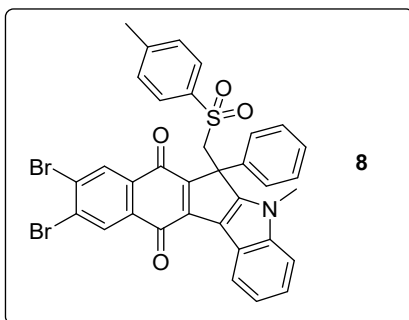

Blue solid, m.p. 295-296 °C, yield: 65.9 mg, 47% yield; Rf: 0.51 (EA:PE =1:3). <sup>1</sup>H NMR (400 MHz, CDCl<sub>3</sub>) δ 8.4 (dd, *J* = 6.2, 3.1 Hz, 1H), 8.2 (s, 1H), 8.1 (s, 1H), 7.4 – 7.4 (m, 3H), 7.2 (d, *J* = 6.8 Hz, 5H), 7.1 – 7.0 (m, 2H), 6.8 (d, *J* = 7.9 Hz, 2H), 5.4 (d, *J* = 14.6 Hz, 1H), 4.4 (d, *J* = 14.6 Hz, 1H), 3.6 (s, 3H), 2.0 (s, 3H). <sup>13</sup>C NMR (101 MHz, CDCl<sub>3</sub>) 181.0, 176.5, 157.8, 146.4, 145.2, 143.2, 142.1, 135.7, 134.7, 133.5, 131.6, 131.4, 131.2, 130.7, 129.6, 129.4, 129.2, 128.6, 128.6, 125.6, 124.1, 122.8, 122.7,

121.7, 118.2, 110.7, 58.2, 52.6, 31.9, 21.2. HRMS (ESI) Calcd for  $C_{34}H_{23}Br_2NNaO_4S^+[M+Na]^+$ : 721.9612, Found: 721.9614.

**5-methyl-6-phenyl-6-(tosylmethyl)-5,6-dihydronaphtho[2',3':5,6]indeno[2,1-*b*]indole-7,14-dione (9)**

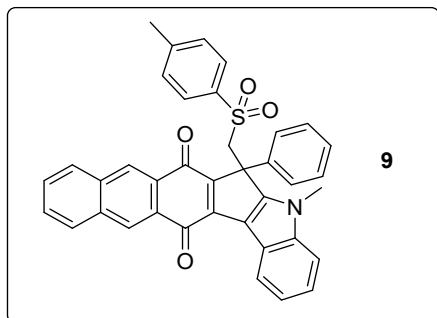

Blue solid, m.p. 271-272 °C, yield: 47.5 mg, 40% yield; Rf: 0.37 (EA:PE =1:3).  $^1H$  NMR (400 MHz,  $CDCl_3$ )  $\delta$  8.5 (d,  $J = 16.6$  Hz, 2H), 8.3 (s, 1H), 8.0 – 7.9 (m, 2H), 7.7 – 7.6 (m, 2H), 7.4 (s, 3H), 7.2 (d,  $J = 8.8$  Hz, 5H), 7.1 (dd,  $J = 6.8, 3.0$  Hz, 2H), 6.7 (d,  $J = 7.8$  Hz, 2H), 5.6 (d,  $J = 14.6$  Hz, 1H), 4.4 (d,  $J = 14.6$  Hz, 1H), 3.7 (s, 3H), 1.6 (s, 3H).  $^{13}C$  NMR (101 MHz,  $CDCl_3$ ) 182.2, 178.3, 157.1, 147.9, 145.2, 144.0, 143.1, 136.3, 134.9, 134.3, 134.0, 130.8, 130.0, 129.9, 129.4, 129.3, 129.1, 129.0, 128.5, 128.4, 127.9, 127.7, 125.8, 123.8, 122.9, 122.4, 121.9, 118.6, 110.7, 58.3, 53.5, 52.6, 31.9, 21.0. HRMS (ESI) Calcd for  $C_{38}H_{27}NNaO_4S^+[M+Na]^+$ : 616.1558, Found: 616.1558.

**1,5-dimethyl-6-phenyl-6-(tosylmethyl)-5,6-dihydrobenzo[5,6]indeno[2,1-*b*]indole-7,12-dione (10)**

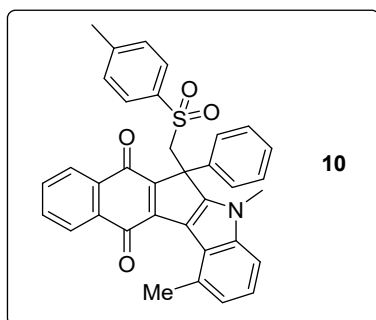

Blue solid, m.p. 260-261 °C, yield: 56.9 mg, 51% yield; Rf: 0.40 (EA:PE =1:3).  $^1H$  NMR (400 MHz,  $CDCl_3$ )  $\delta$  8.02 – 7.95 (m, 1H), 7.86 – 7.79 (m, 1H), 7.67 – 7.55 (m, 2H), 7.29 (d,  $J = 8.5$  Hz, 2H), 7.24 – 7.17 (m, 5H), 7.09 (dd,  $J = 6.7, 2.8$  Hz, 2H), 6.74

(d,  $J = 7.9$  Hz, 2H), 5.52 (d,  $J = 14.6$  Hz, 1H), 4.40 (d,  $J = 14.7$  Hz, 1H), 3.54 (s, 3H), 3.06 (s, 3H), 1.90 (s, 3H).  $^{13}\text{C}$  NMR (101 MHz,  $\text{CDCl}_3$ ) 182.5, 179.0, 157.6, 148.0, 145.2, 143.6, 143.2, 136.4, 134.6, 133.6, 133.3, 133.3, 133.1, 132.4, 129.3, 129.1, 128.4, 128.3, 126.0, 125.7, 125.3, 124.5, 123.6, 122.0, 116.6, 108.1, 58.0, 51.0, 31.7, 23.3, 21.3. HRMS (ESI) Calcd for  $\text{C}_{35}\text{H}_{27}\text{NNaO}_4\text{S}^+[\text{M}+\text{Na}]^+$ : 580.1558, Found: 580.1559.

**2-methoxy-5-methyl-6-phenyl-6-(tosylmethyl)-5,6-dihydrobenzo[5,6]indeno[2,1-*b*]indole-7,12-dione (11)**

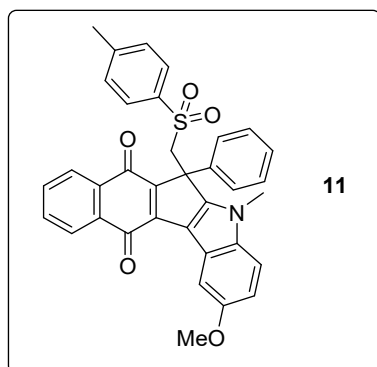

Blue solid, m.p. 323-324 °C, yield: 65.3 mg, 57% yield; R<sub>f</sub>: 0.30 (EA:PE =1:3).  $^1\text{H}$  NMR (400 MHz,  $\text{CDCl}_3$ )  $\delta$  8.0 (dd,  $J = 7.4, 1.6$  Hz, 1H), 7.9 (d,  $J = 2.5$  Hz, 1H), 7.9 (dd,  $J = 7.5, 1.6$  Hz, 1H), 7.6 (dtd,  $J = 19.5, 7.3, 1.6$  Hz, 2H), 7.3 (d,  $J = 8.9$  Hz, 1H), 7.3 – 7.2 (m, 6H), 7.1 (d,  $J = 3.4$  Hz, 1H), 7.0 (dd,  $J = 8.9, 2.5$  Hz, 1H), 6.7 (d,  $J = 7.9$  Hz, 2H), 5.5 (d,  $J = 14.6$  Hz, 1H), 4.3 (d,  $J = 14.6$  Hz, 1H), 4.1 (s, 3H), 3.6 (s, 3H), 1.9 (s, 3H).  $^{13}\text{C}$  NMR (101 MHz,  $\text{CDCl}_3$ ) 182.9, 178.6, 157.1, 146.6, 145.3, 141.6, 138.0, 136.5, 134.4, 134.2, 133.7, 132.1, 132.1, 129.3, 129.1, 128.5, 128.3, 125.8, 125.7, 125.6, 122.4, 118.0, 113.7, 111.4, 104.4, 58.2, 56.0, 53.4, 52.4, 32.0, 21.2. HRMS (ESI) Calcd for  $\text{C}_{35}\text{H}_{27}\text{NNaO}_5\text{S}^+[\text{M}+\text{Na}]^+$ : 596.1508, Found: 596.1509.

**2,5-dimethyl-6-phenyl-6-(tosylmethyl)-5,6-dihydrobenzo[5,6]indeno[2,1-*b*]indole-7,12-dione (12)**

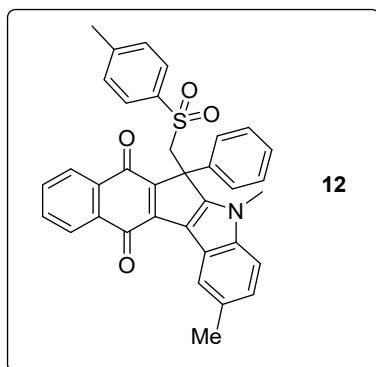

Blue solid, m.p. 308-309 °C, yield: 59.1 mg, 53% yield; Rf: 0.37 (EA:PE =1:3). <sup>1</sup>H NMR (400 MHz, CDCl<sub>3</sub>) δ 8.2 (s, 1H), 8.0 (dd, *J* = 7.3, 1.6 Hz, 1H), 7.9 (dd, *J* = 7.5, 1.6 Hz, 1H), 7.7 – 7.6 (m, 2H), 7.3 (d, *J* = 8.4 Hz, 1H), 7.2 (dd, *J* = 9.0, 4.6 Hz, 5H), 7.1 – 7.0 (m, 3H), 6.7 (d, *J* = 8.0 Hz, 2H), 5.5 (d, *J* = 14.5 Hz, 1H), 4.4 (d, *J* = 14.5 Hz, 1H), 3.6 (s, 3H), 2.6 (s, 3H), 1.9 (s, 3H). <sup>13</sup>C NMR (101 MHz, CDCl<sub>3</sub>) 182.8, 178.5, 157.2, 146.6, 145.3, 141.8, 141.5, 136.4, 134.4, 134.2, 133.7, 132.1, 129.3, 129.1, 128.6, 128.3, 125.8, 125.7, 125.6, 125.3, 122.5, 121.9, 117.9, 110.3, 58.2, 52.4, 31.9, 21.6, 21.2. HRMS (ESI) Calcd for C<sub>35</sub>H<sub>27</sub>NNaO<sub>4</sub>S<sup>+</sup>[M+Na]<sup>+</sup>: 580.1558, Found: 580.1560.

**3-methoxy-5-methyl-6-phenyl-6-(tosylmethyl)-5,6-dihydrobenzo[5,6]indeno[2,1-*b*]indole-7,12-dione (13)**

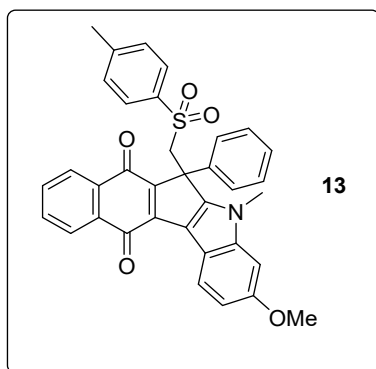

Blue solid, m.p. 173-174 °C, yield: 59.7 mg, 52% yield; Rf: 0.23(EA:PE =1:3). <sup>1</sup>H NMR (400 MHz, CDCl<sub>3</sub>) δ 8.31 (d, *J* = 8.7 Hz, 1H), 8.00 (d, *J* = 7.5 Hz, 1H), 7.86 (d, *J* = 7.6 Hz, 1H), 7.69 – 7.55 (m, 2H), 7.21 (d, *J* = 8.4 Hz, 5H), 7.10 (d, *J* = 2.3 Hz, 2H), 7.05 (dd, *J* = 8.7, 2.1 Hz, 1H), 6.88 (s, 1H), 6.72 (d, *J* = 7.8 Hz, 2H), 5.48 (d, *J* = 14.5 Hz, 1H), 4.35 (d, *J* = 14.5 Hz, 1H), 3.95 (s, 3H), 3.60 (s, 3H), 1.87 (s, 3H). <sup>13</sup>C NMR (101 MHz, CDCl<sub>3</sub>) 182.8, 178.5, 157.7, 156.5, 146.3, 145.3, 144.1, 141.9, 136.5, 134.3,



134.2, 133.7, 132.1, 132.1, 129.3, 129.0, 128.5, 128.3, 125.8, 125.7, 125.6, 123.5, 118.5, 115.8, 111.5, 94.8, 58.3, 55.8, 52.5, 32.0, 21.2. HRMS (ESI) Calcd for  $C_{35}H_{27}NNaO_5S^+[M+Na]^+$ : 596.1508, Found: 596.1508.

**3-chloro-5-methyl-6-phenyl-6-(tosylmethyl)-5,6-dihydrobenzo[5,6]indeno[2,1-*b*]indole-7,12-dione (14)**

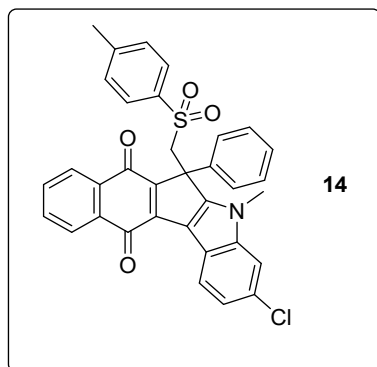

Purple solid, m.p. 305-306 °C, yield: 42.8 mg, 37% yield; Rf: 0.37 (EA:PE =1:3).  $^1H$  NMR (400 MHz,  $CDCl_3$ )  $\delta$  8.35 (d,  $J = 8.4$  Hz, 1H), 8.02 (d,  $J = 7.2$  Hz, 1H), 7.87 (d,  $J = 7.2$  Hz, 1H), 7.64 (p,  $J = 7.2$  Hz, 2H), 7.43 – 7.35 (m, 2H), 7.27 – 7.18 (m, 5H), 7.09 (s, 2H), 6.74 (d,  $J = 7.7$  Hz, 2H), 5.46 (d,  $J = 14.6$  Hz, 1H), 4.36 (d,  $J = 14.6$  Hz, 1H), 3.60 (s, 3H), 1.89 (s, 3H).  $^{13}C$  NMR (101 MHz,  $CDCl_3$ ) 182.5, 178.9, 157.3, 146.0, 145.4, 143.3, 142.9, 135.8, 134.4, 134.0, 133.8, 132.4, 132.0, 129.7, 129.4, 129.1, 128.5, 128.5, 125.9, 125.7, 125.6, 123.6, 122.9, 120.2, 118.2, 110.9, 58.2, 52.7, 32.0, 21.2. HRMS (ESI) Calcd for  $C_{34}H_{24}ClNNaO_4S^+[M+Na]^+$ : 600.1012, Found: 600.1010.

**3-bromo-5-methyl-6-phenyl-6-(tosylmethyl)-5,6-dihydrobenzo[5,6]indeno[2,1-*b*]indole-7,12-dione (15)**

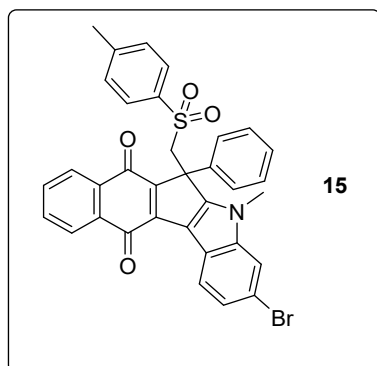

Purple solid, m.p. 310-311 °C, yield: 43.5 mg, 35% yield; Rf: 0.37 (EA:PE =1:3).  $^1H$  NMR (400 MHz,  $CDCl_3$ )  $\delta$  8.30 (d,  $J = 8.5$  Hz, 1H), 8.02 (d,  $J = 7.3$  Hz, 1H), 7.87 (d,

$J = 7.4$  Hz, 1H), 7.69 – 7.58 (m, 2H), 7.56 (s, 1H), 7.51 (d,  $J = 8.4$  Hz, 1H), 7.22 (dd,  $J = 9.8, 5.8$  Hz, 5H), 7.12 – 7.05 (m, 2H), 6.74 (d,  $J = 7.9$  Hz, 2H), 5.46 (d,  $J = 14.6$  Hz, 1H), 4.35 (d,  $J = 14.5$  Hz, 1H), 3.60 (s, 3H), 1.90 (s, 3H).  $^{13}\text{C}$  NMR (101 MHz,  $\text{CDCl}_3$ ) 182.5, 178.9, 157.2, 146.0, 145.4, 143.6, 143.0, 135.8, 134.3, 134.0, 133.8, 132.4, 132.0, 129.4, 129.1, 128.5, 128.5, 125.9, 125.7, 125.6, 125.6, 123.9, 120.5, 118.2, 117.3, 113.8, 58.1, 52.7, 32.0, 21.2. HRMS (ESI) Calcd for  $\text{C}_{34}\text{H}_{24}\text{BrNNaO}_4\text{S}^+[\text{M}+\text{Na}]^+$ : 644.0507, Found: 644.0510.

**4,5-dimethyl-6-phenyl-6-(tosylmethyl)-5,6-dihydrobenzo[5,6]indeno[2,1-*b*]indole-7,12-dione (16)**

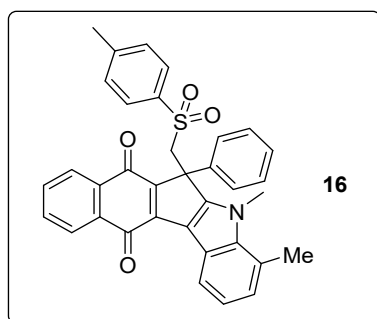

Blue solid, m.p. 285-286 °C, yield: 66.8 mg, 60% yield; R<sub>f</sub>: 0.34 (EA:PE =1:3).  $^1\text{H}$  NMR (400 MHz,  $\text{CDCl}_3$ )  $\delta$  8.35 (d,  $J = 7.9$  Hz, 1H), 7.87 (d,  $J = 8.2$  Hz, 1H), 7.69 – 7.56 (m, 2H), 7.29 – 7.19 (m, 6H), 7.10 (t,  $J = 7.3$  Hz, 3H), 6.72 (d,  $J = 7.9$  Hz, 2H), 5.50 (d,  $J = 14.5$  Hz, 1H), 4.37 (d,  $J = 14.5$  Hz, 1H), 3.81 (s, 3H), 2.77 (s, 3H), 1.90 (s, 3H).  $^{13}\text{C}$  NMR (101 MHz,  $\text{CDCl}_3$ ) 182.7, 178.7, 157.3, 146.4, 145.2, 142.4, 141.4, 136.2, 134.5, 134.1, 133.7, 132.2, 132.1, 129.3, 129.1, 128.5, 128.3, 127.1, 125.8, 125.7, 122.7, 122.5, 121.0, 118.4, 58.2, 53.4, 52.6, 35.8, 21.2, 19.8. HRMS (ESI) Calcd for  $\text{C}_{35}\text{H}_{27}\text{NNaO}_4\text{S}^+[\text{M}+\text{Na}]^+$ : 580.1558, Found: 580.1562.

**6-phenyl-6-(tosylmethyl)-5,6-dihydrobenzo[5,6]indeno[2,1-*b*]indole-7,12-dione (17)**

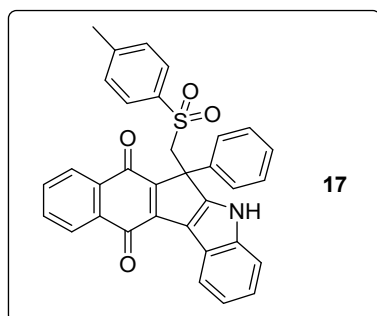

Blue solid, m.p. 271-272 °C, yield: 45.5 mg, 43% yield; Rf: 0.23 (EA:PE =1:3). <sup>1</sup>H NMR (400 MHz, CDCl<sub>3</sub>) δ 9.91 (s, 1H), 8.50 – 8.44 (m, 1H), 8.09 (dd, *J* = 7.3, 1.8 Hz, 1H), 7.99 – 7.92 (m, 1H), 7.70 – 7.59 (m, 2H), 7.56 – 7.49 (m, 1H), 7.38 (d, *J* = 8.1 Hz, 4H), 7.14 (dq, *J* = 23.4, 7.8, 6.8 Hz, 5H), 7.00 (d, *J* = 7.9 Hz, 2H), 5.07 (d, *J* = 15.0 Hz, 1H), 4.32 (d, *J* = 15.0 Hz, 1H), 2.19 (s, 3H). <sup>13</sup>C NMR (101 MHz, CDCl<sub>3</sub>) 183.0, 179.3, 156.4, 146.2, 145.1, 142.9, 141.8, 136.3, 135.3, 134.1, 133.9, 132.5, 132.1, 129.5, 128.7, 128.0, 127.0, 126.1, 125.9, 124.2, 122.7, 122.4, 121.7, 119.2, 113.0, 59.7, 54.3, 21.4. HRMS (ESI) Calcd for C<sub>33</sub>H<sub>23</sub>NNaO<sub>4</sub>S<sup>+</sup>[M+Na]<sup>+</sup>: 552.1245, Found: 552.1246.

**5-allyl-6-phenyl-6-(tosylmethyl)-5,6-dihydrobenzo[5,6]indeno[2,1-*b*]indole-7,12-dione (19)**

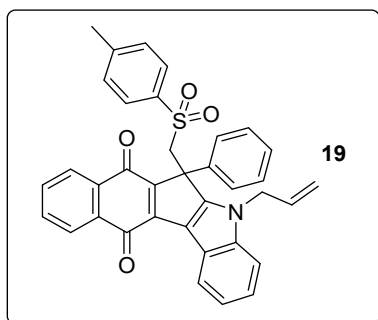

Blue solid, m.p. 231-232 °C, yield: 63.7 mg, 56% yield; Rf: 0.34 (EA:PE =1:3). <sup>1</sup>H NMR (400 MHz, CDCl<sub>3</sub>) δ 8.47 (d, *J* = 8.7 Hz, 1H), 8.05 (d, *J* = 9.0 Hz, 1H), 7.82 (d, *J* = 7.0 Hz, 1H), 7.68 – 7.57 (m, 2H), 7.43 – 7.33 (m, 3H), 7.27 – 7.18 (m, 5H), 7.06 (dd, *J* = 6.6, 3.1 Hz, 2H), 6.75 (d, *J* = 7.8 Hz, 2H), 5.63 (ddt, *J* = 16.5, 10.4, 6.0 Hz, 1H), 5.42 (d, *J* = 14.5 Hz, 1H), 5.19 – 5.03 (m, 2H), 4.69 – 4.52 (m, 2H), 4.44 (d, *J* = 14.6 Hz, 1H), 1.89 (s, 3H). <sup>13</sup>C NMR (101 MHz, CDCl<sub>3</sub>) 182.7, 178.6, 157.4, 146.6, 145.2, 143.0, 142.5, 136.3, 134.6, 134.0, 133.7, 132.2, 132.2, 131.9, 129.3, 129.2, 129.1, 128.5, 128.4, 128.3, 125.8, 125.7, 125.5, 125.3, 123.7, 122.8, 122.4, 122.2, 122.0, 118.8, 118.3, 111.8, 57.8, 52.3, 49.1, 21.2. HRMS (ESI) Calcd for C<sub>36</sub>H<sub>27</sub>NNaO<sub>4</sub>S<sup>+</sup>[M+Na]<sup>+</sup>: 592.1558, Found: 592.1562.

**5-methyl-6-phenethyl-6-(tosylmethyl)-5,6-dihydrobenzo[5,6]indeno[2,1-*b*]indole-7,12-dione (20)**

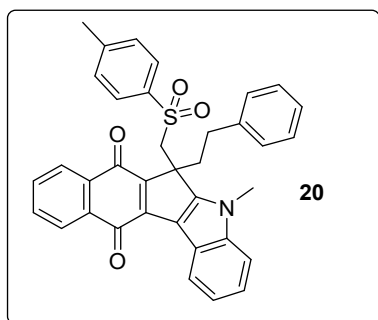

Blue solid, m.p. 89-90 °C, yield: 26.3 mg, 23% yield; Rf: 0.34 (EA:PE =1:3). <sup>1</sup>H NMR (400 MHz, CDCl<sub>3</sub>) δ 8.41 (dd, *J* = 7.0, 2.7 Hz, 1H), 8.06 (d, *J* = 7.5 Hz, 1H), 7.96 (d, *J* = 7.6 Hz, 1H), 7.72 (t, *J* = 7.4 Hz, 1H), 7.66 (t, *J* = 7.4 Hz, 1H), 7.39 (q, *J* = 4.8 Hz, 2H), 7.11 (d, *J* = 7.9 Hz, 2H), 6.97 (q, *J* = 7.9, 7.3 Hz, 3H), 6.70 (dd, *J* = 15.7, 7.4 Hz, 4H), 4.89 (d, *J* = 15.0 Hz, 1H), 3.92 (d, *J* = 15.0 Hz, 1H), 3.82 (s, 3H), 2.92 (ddd, *J* = 14.2, 9.5, 6.5 Hz, 1H), 2.43 (ddd, *J* = 13.9, 9.6, 6.4 Hz, 1H), 2.12 (dt, *J* = 15.4, 8.8 Hz, 1H), 1.86 (s, 4H). <sup>13</sup>C NMR (101 MHz, CDCl<sub>3</sub>) 182.2, 179.2, 155.6, 147.8, 145.2, 143.2, 140.0, 139.1, 134.5, 134.2, 133.7, 132.2, 129.1, 128.4, 128.2, 128.1, 126.0, 125.8, 125.7, 123.6, 122.6, 122.3, 121.7, 118.7, 110.4, 59.6, 50.5, 38.4, 31.9, 29.5, 21.2. HRMS (ESI) Calcd for C<sub>36</sub>H<sub>29</sub>NNaO<sub>4</sub>S<sup>+</sup>[M+Na]<sup>+</sup>:594.1715, Found: 594.1719.

**6-(4-methoxyphenyl)-5-methyl-6-(tosylmethyl)-5,6-dihydrobenzo[5,6]indeno[2,1-*b*]indole-7,12-dione (21)**

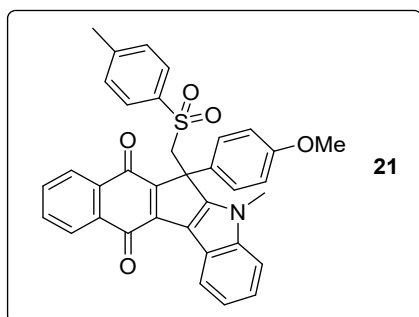

Blue solid, m.p. 246-247 °C, yield: 80.2 mg, 70% yield; Rf: 0.31 (EA:PE =1:3). <sup>1</sup>H NMR (400 MHz, CDCl<sub>3</sub>) δ 8.44 (d, *J* = 3.5 Hz, 1H), 8.02 (d, *J* = 8.0 Hz, 1H), 7.86 (d, *J* = 6.8 Hz, 1H), 7.69 – 7.56 (m, 2H), 7.41 (d, *J* = 3.2 Hz, 3H), 7.20 (d, *J* = 7.9 Hz, 2H), 7.02 (d, *J* = 8.5 Hz, 2H), 6.72 (t, *J* = 7.4 Hz, 4H), 5.46 (d, *J* = 14.5 Hz, 1H), 4.34 (d, *J* = 14.5 Hz, 1H), 3.71 (s, 3H), 3.65 (s, 3H), 1.87 (s, 3H). <sup>13</sup>C NMR (101 MHz, CDCl<sub>3</sub>) 182.7, 178.8, 159.4, 157.0, 146.2, 145.3, 143.0, 142.3, 134.3, 134.1, 133.7, 132.2, 132.1, 129.0, 128.5, 127.7, 126.9, 125.8, 125.6, 123.7, 122.7, 122.3, 121.7, 118.0,

114.6, 110.6, 58.4, 55.2, 52.0, 31.9, 21.2. HRMS (ESI) Calcd for  $C_{35}H_{27}NNaO_5S^+[M+Na]^+$ : 596.1508, Found: 596.1509.

**5-methyl-6-(*p*-tolyl)-6-(tosylmethyl)-5,6-dihydrobenzo[5,6]indeno[2,1-*b*]indole-7,12-dione (22)**

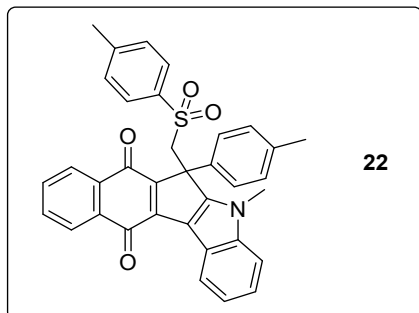

Blue solid, m.p. 244-245 °C, yield: 70.2 mg, 63% yield; Rf: 0.49 (EA:PE =1:3).  $^1H$  NMR (400 MHz,  $CDCl_3$ )  $\delta$  8.45 (dq,  $J = 5.4, 2.1$  Hz, 1H), 8.02 (dd,  $J = 7.2, 1.7$  Hz, 1H), 7.86 (dd,  $J = 7.3, 1.7$  Hz, 1H), 7.68 – 7.55 (m, 2H), 7.41 (d,  $J = 2.8$  Hz, 3H), 7.21 (d,  $J = 8.3$  Hz, 2H), 7.00 (q,  $J = 8.5$  Hz, 4H), 6.72 (d,  $J = 8.0$  Hz, 2H), 5.47 (d,  $J = 14.6$  Hz, 1H), 4.35 (d,  $J = 14.6$  Hz, 1H), 3.64 (s, 3H), 2.23 (s, 3H), 1.87 (s, 3H).  $^{13}C$  NMR (101 MHz,  $CDCl_3$ ) 182.7, 178.7, 157.1, 146.4, 145.3, 143.0, 142.3, 138.3, 134.4, 134.1, 133.6, 133.0, 132.2, 132.1, 130.0, 129.1, 128.5, 125.8, 125.6, 125.5, 123.7, 122.7, 122.3, 121.8, 118.2, 110.6, 77.4, 77.0, 76.7, 58.3, 52.2, 31.9, 21.2, 20.9. HRMS (ESI) Calcd for  $C_{35}H_{27}NNaO_4S^+[M+Na]^+$ : 580.1558, Found: 580.1560.

**6-(4-chlorophenyl)-5-methyl-6-(tosylmethyl)-5,6-dihydrobenzo[5,6]indeno[2,1-*b*]indole-7,12-dione (23)**

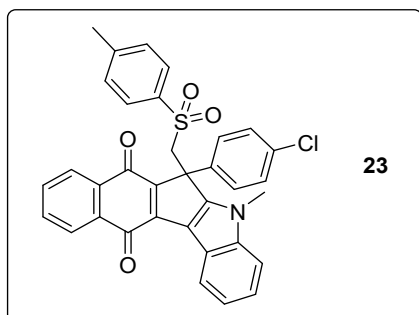

Blue solid, m.p. 210-211 °C, yield: 81.9 mg, 71% yield; Rf: 0.49 (EA:PE =1:3).  $^1H$  NMR (400 MHz,  $CDCl_3$ )  $\delta$  8.49 – 8.41 (m, 1H), 8.03 (dd,  $J = 7.2, 1.7$  Hz, 1H), 7.86 (dd,  $J = 7.2, 1.6$  Hz, 1H), 7.70 – 7.57 (m, 2H), 7.42 (d,  $J = 2.8$  Hz, 3H), 7.19 (dd,  $J = 8.6, 6.8$  Hz, 4H), 7.08 – 7.00 (m, 2H), 6.72 (d,  $J = 8.1$  Hz, 2H), 5.43 (d,  $J = 14.5$  Hz,

1H), 4.33 (d,  $J = 14.5$  Hz, 1H), 3.64 (s, 3H), 1.88 (s, 3H).  $^{13}\text{C}$  NMR (101 MHz,  $\text{CDCl}_3$ ) 182.5, 178.7, 156.5, 146.5, 145.4, 143.0, 141.8, 134.9, 134.3, 134.2, 134.0, 133.8, 132.3, 132.1, 129.4, 129.1, 128.5, 127.2, 125.8, 125.7, 123.9, 122.8, 122.5, 121.7, 118.4, 110.7, 58.0, 52.0, 31.9, 21.2. HRMS (ESI) Calcd for  $\text{C}_{34}\text{H}_{24}\text{ClNNaO}_4\text{S}^+[\text{M}+\text{Na}]^+$ : 600.1012, Found: 600.1014.

**6-(4-bromophenyl)-5-methyl-6-(tosylmethyl)-5,6-dihydrobenzo[5,6]indeno[2,1-*b*]indole-7,12-dione (24)**

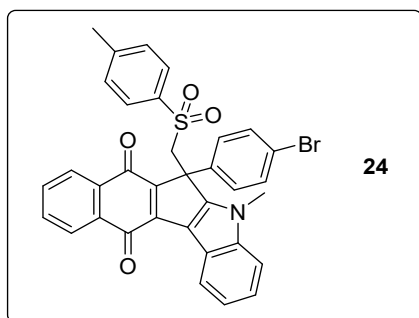

Blue solid, m.p. 143-144 °C, yield: 109.3 mg, 88% yield; Rf: 0.51 (EA:PE =1:3).  $^1\text{H}$  NMR (400 MHz,  $\text{CDCl}_3$ )  $\delta$  8.45 (dp,  $J = 6.1, 1.8$  Hz, 1H), 8.06 – 8.00 (m, 1H), 7.89 – 7.83 (m, 1H), 7.63 (dtd,  $J = 16.6, 7.4, 1.5$  Hz, 2H), 7.47 – 7.39 (m, 3H), 7.37 – 7.29 (m, 2H), 7.20 (d,  $J = 8.3$  Hz, 2H), 7.01 – 6.93 (m, 2H), 6.72 (d,  $J = 8.6$  Hz, 2H), 5.42 (d,  $J = 14.5$  Hz, 1H), 4.32 (d,  $J = 14.5$  Hz, 1H), 3.64 (s, 3H), 1.87 (s, 3H).  $^{13}\text{C}$  NMR (101 MHz,  $\text{CDCl}_3$ ) 182.5, 178.7, 156.4, 146.5, 145.4, 143.0, 141.7, 135.4, 134.2, 134.0, 133.8, 132.4, 132.3, 132.0, 129.1, 128.5, 127.5, 125.8, 125.7, 123.9, 122.8, 122.5, 122.5, 121.7, 118.4, 110.7, 57.9, 52.0, 31.9, 21.2. HRMS (ESI) Calcd for  $\text{C}_{34}\text{H}_{24}\text{BrNNaO}_4\text{S}^+[\text{M}+\text{Na}]^+$ : 644.0507, Found: 644.0510.

**5-methyl-6-(*m*-tolyl)-6-(tosylmethyl)-5,6-dihydrobenzo[5,6]indeno[2,1-*b*]indole-7,12-dione (25)**

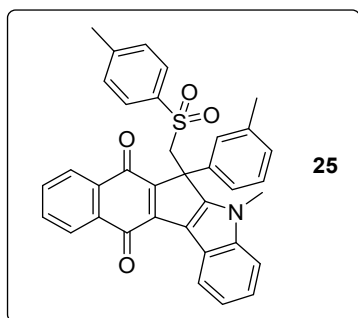

Blue solid, m.p. 141-142 °C, yield: 59.1 mg, 53% yield; Rf: 0.46 (EA:PE =1:3). <sup>1</sup>H NMR (400 MHz, CDCl<sub>3</sub>) δ 8.45 (dt, *J* = 4.9, 2.2 Hz, 1H), 8.03 (d, *J* = 7.3 Hz, 1H), 7.86 (d, *J* = 7.4 Hz, 1H), 7.68 – 7.58 (m, 2H), 7.41 (s, 3H), 7.20 (d, *J* = 8.0 Hz, 2H), 7.10 (t, *J* = 7.8 Hz, 1H), 7.03 (d, *J* = 7.6 Hz, 1H), 6.93 (s, 1H), 6.86 (d, *J* = 8.0 Hz, 1H), 6.72 (d, *J* = 7.9 Hz, 2H), 5.46 (d, *J* = 14.5 Hz, 1H), 4.38 (d, *J* = 14.5 Hz, 1H), 3.64 (s, 3H), 2.23 (s, 3H), 1.87 (s, 3H). <sup>13</sup>C NMR (101 MHz, CDCl<sub>3</sub>) 182.7, 178.6, 157.2, 146.6, 145.2, 143.0, 142.3, 139.0, 135.9, 134.4, 134.1, 133.6, 132.1, 132.1, 129.2, 129.1, 129.0, 128.5, 126.2, 125.8, 125.6, 123.6, 122.7, 122.6, 122.3, 121.8, 118.1, 110.6, 58.2, 52.3, 31.8, 21.6, 21.2. HRMS (ESI) Calcd for C<sub>35</sub>H<sub>27</sub>NNaO<sub>4</sub>S<sup>+</sup>[M+Na]<sup>+</sup>: 580.1558, Found: 580.1561.

**5-methyl-6-(*o*-tolyl)-6-(tosylmethyl)-5,6-dihydrobenzo[5,6]indeno[2,1-*b*]indole-7,12-dione (26)**

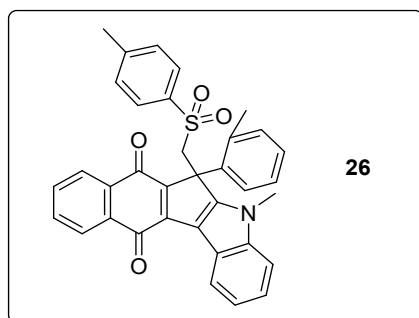

Blue solid, m.p. 247-248 °C, yield: 54.6 mg, 49% yield; Rf: 0.40 (EA:PE =1:3). <sup>1</sup>H NMR (400 MHz, CDCl<sub>3</sub>) δ 8.42 (d, *J* = 8.6 Hz, 1H), 8.06 (d, *J* = 8.8 Hz, 1H), 7.88 (d, *J* = 7.1 Hz, 1H), 7.80 (d, *J* = 8.2 Hz, 1H), 7.65 (p, *J* = 7.3, 6.8 Hz, 2H), 7.39 (p, *J* = 7.1 Hz, 3H), 7.32 (d, *J* = 8.0 Hz, 1H), 7.19 (d, *J* = 7.7 Hz, 3H), 6.90 (d, *J* = 7.5 Hz, 1H), 6.74 (d, *J* = 7.9 Hz, 2H), 5.26 (d, *J* = 14.1 Hz, 1H), 4.54 (d, *J* = 14.1 Hz, 1H), 3.49 (s, 3H), 1.95 (s, 3H), 1.35 (s, 3H). <sup>13</sup>C NMR (101 MHz, CDCl<sub>3</sub>) 181.8, 177.9, 156.2, 147.0, 143.7, 141.5, 137.7, 135.5, 134.1, 133.1, 132.7, 132.1, 132.0, 131.3, 131.2, 128.2, 127.2, 126.8, 126.6, 126.2, 124.9, 124.7, 122.7, 121.8, 121.5, 121.0, 118.2, 109.6, 58.6, 50.6, 30.2, 20.3, 18.5. HRMS (ESI) Calcd for C<sub>35</sub>H<sub>27</sub>NNaO<sub>4</sub>S<sup>+</sup>[M+Na]<sup>+</sup>: 580.1558, Found: 580.1561.

**5-methyl-6-(thiophen-2-yl)-6-(tosylmethyl)-5,6-dihydrobenzo[5,6]indeno[2,1-*b*]indole-7,12-dione (27)**

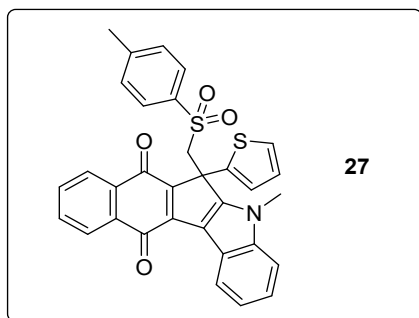

Blue solid, m.p. 247-248 °C, yield: 27.5 mg, 25% yield; Rf: 0.37 (EA:PE =1:3). <sup>1</sup>H NMR (400 MHz, CDCl<sub>3</sub>) δ 8.46 – 8.39 (m, 1H), 8.03 (d, *J* = 7.5 Hz, 1H), 7.91 (d, *J* = 7.5 Hz, 1H), 7.65 (dt, *J* = 21.4, 7.4 Hz, 2H), 7.41 (d, *J* = 7.5 Hz, 3H), 7.20 (d, *J* = 7.9 Hz, 2H), 7.10 (d, *J* = 6.2 Hz, 1H), 7.02 (d, *J* = 3.8 Hz, 1H), 6.88 (t, *J* = 4.5 Hz, 1H), 6.72 (d, *J* = 7.9 Hz, 2H), 5.48 (d, *J* = 14.7 Hz, 1H), 4.36 (d, *J* = 14.7 Hz, 1H), 3.80 (s, 3H), 1.85 (s, 3H). <sup>13</sup>C NMR (101 MHz, CDCl<sub>3</sub>) 182.6, 178.7, 155.7, 145.9, 145.4, 143.0, 140.6, 139.0, 134.1, 134.0, 133.7, 132.3, 132.0, 129.1, 128.6, 127.1, 125.8, 125.7, 125.7, 125.0, 123.9, 122.9, 122.5, 121.7, 117.6, 110.7, 59.1, 50.3, 32.2, 21.2. HRMS (ESI) Calcd for C<sub>32</sub>H<sub>23</sub>NNaO<sub>4</sub>S<sub>2</sub><sup>+</sup>[M+Na]<sup>+</sup>: 572.0966, Found: 572.0969.

**6-((cyclopropylsulfonyl)methyl)-5-methyl-6-phenyl-5,6-dihydrobenzo[5,6]indeno[2,1-*b*]indole-7,12-dione (28)**

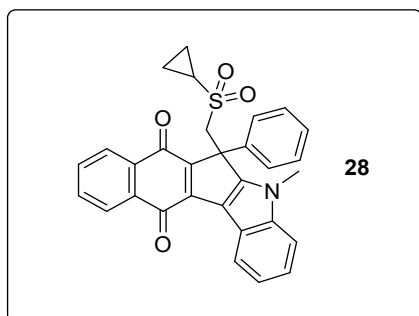

Blue solid, m.p. 283-284 °C, yield: 34.5 mg, 35% yield; Rf: 0.17 (EA:PE =1:3). <sup>1</sup>H NMR (400 MHz, CDCl<sub>3</sub>) δ 8.53 – 8.44 (m, 1H), 8.15 (dd, *J* = 7.3, 1.6 Hz, 1H), 8.08 – 7.98 (m, 1H), 7.66 (pd, *J* = 7.4, 1.7 Hz, 2H), 7.46 – 7.33 (m, 3H), 7.31 – 7.21 (m, 3H), 7.17 (dd, *J* = 6.8, 3.1 Hz, 2H), 5.40 (d, *J* = 14.1 Hz, 1H), 4.30 (d, *J* = 14.1 Hz, 1H), 3.68 (s, 3H), 2.10 (tt, *J* = 7.9, 4.8 Hz, 1H), 1.12 – 0.97 (m, 2H), 0.82 – 0.67 (m, 2H). <sup>13</sup>C NMR (101 MHz, CDCl<sub>3</sub>) 183.2, 179.4, 157.8, 146.6, 143.9, 143.0, 136.0, 134.2, 134.0, 132.6, 132.4, 129.4, 128.5, 126.3, 126.1, 125.8, 123.8, 123.1, 122.5, 122.0, 118.1,



110.5, 57.1, 52.4, 31.8, 30.5, 5.3, 5.2. HRMS (ESI) Calcd for  $C_{30}H_{23}NNaO_4S^+[M+Na]^+$ : 516.1245, Found: 516.1249.

**5-methyl-6-((octylsulfonyl)methyl)-6-phenyl-5,6-dihydrobenzo[5,6]indeno[2,1-*b*]indole-7,12-dione (29)**

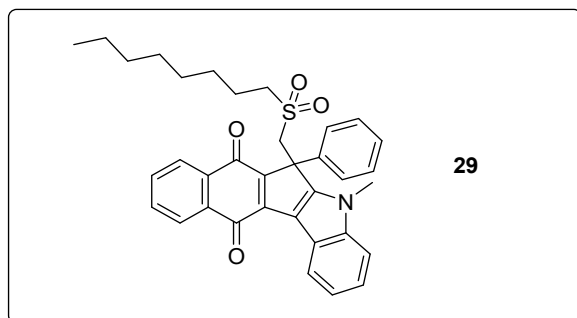

Blue solid, m.p. 127-128 °C, yield: 37.3 mg, 33% yield; Rf: 0.71 (EA:PE =1:3).  $^1H$  NMR (400 MHz,  $CDCl_3$ )  $\delta$  8.49 (ddd,  $J = 6.6, 3.3, 2.2$  Hz, 1H), 8.20 – 8.11 (m, 1H), 8.06 – 7.98 (m, 1H), 7.73 – 7.60 (m, 2H), 7.46 – 7.33 (m, 3H), 7.26 (d,  $J = 6.6$  Hz, 3H), 7.20 – 7.11 (m, 2H), 5.35 – 5.27 (m, 1H), 4.19 (d,  $J = 14.0$  Hz, 1H), 3.68 (s, 3H), 2.76 (t,  $J = 8.1$  Hz, 2H), 1.68 (pd,  $J = 8.0, 4.1$  Hz, 2H), 1.41 – 1.17 (m, 3H), 1.11 (t,  $J = 6.0$  Hz, 7H), 0.84 (t,  $J = 7.1$  Hz, 3H).  $^{13}C$  NMR (101 MHz,  $CDCl_3$ ) 183.1, 179.4, 157.8, 146.7, 143.4, 143.0, 136.1, 134.1, 133.9, 132.6, 132.5, 129.4, 128.4, 126.3, 126.1, 125.7, 123.8, 123.1, 122.5, 122.0, 118.2, 110.5, 55.6, 54.4, 52.1, 31.9, 31.6, 28.8, 28.8, 28.3, 22.5, 21.8, 14.0. HRMS (ESI) Calcd for  $C_{35}H_{35}NNaO_4S^+[M+Na]^+$ : 588.2184, Found: 588.2188.

**6-(((4-methoxyphenyl)sulfonyl)methyl)-5-methyl-6-phenyl-5,6-dihydrobenzo[5,6]indeno[2,1-*b*]indole-7,12-dione (30)**

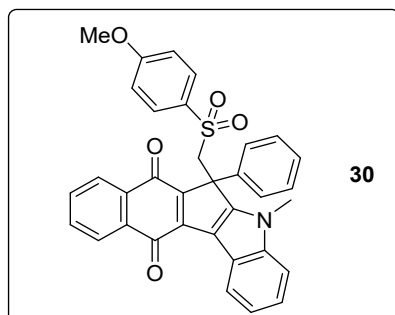

Blue solid, m.p. 255-256 °C, yield: 71.6 mg, 64% yield; Rf: 0.28 (EA:PE =1:3).  $^1H$  NMR (400 MHz,  $CDCl_3$ )  $\delta$  8.50 – 8.42 (m, 1H), 8.06 – 7.99 (m, 1H), 7.91 – 7.84 (m, 1H), 7.63 (pd,  $J = 7.4, 1.6$  Hz, 2H), 7.46 – 7.39 (m, 3H), 7.26 – 7.18 (m, 5H), 7.15 –

7.05 (m, 2H), 6.40 – 6.32 (m, 2H), 5.48 (d,  $J = 14.6$  Hz, 1H), 4.37 (d,  $J = 14.5$  Hz, 1H), 3.64 (s, 3H), 3.44 (s, 3H).  $^{13}\text{C}$  NMR (101 MHz,  $\text{CDCl}_3$ ) 182.8, 178.7, 163.6, 157.0, 146.4, 143.0, 142.3, 136.2, 134.1, 133.7, 132.2, 132.1, 130.7, 129.3, 128.5, 128.3, 125.8, 125.7, 123.7, 122.7, 122.4, 121.7, 118.3, 113.5, 112.1, 110.6, 58.5, 55.2, 52.5, 31.9. HRMS (ESI) Calcd for  $\text{C}_{34}\text{H}_{25}\text{NNaO}_5\text{S}^+[\text{M}+\text{Na}]^+$ : 582.1351, Found: 582.1355.

**5-methyl-6-phenyl-6-((phenylsulfonyl)methyl)-5,6-dihydrobenzo[5,6]indeno[2,1-*b*]indole-7,12-dione (31)**

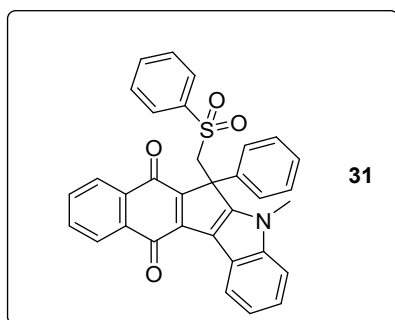

Blue solid, m.p. 277-278 °C, yield: 84.66 mg, 80% yield; Rf: 0.57 (EA:PE =1:3).  $^1\text{H}$  NMR (400 MHz,  $\text{CDCl}_3$ )  $\delta$  8.51 – 8.42 (m, 1H), 8.06 – 7.96 (m, 1H), 7.91 – 7.82 (m, 1H), 7.66 – 7.58 (m, 2H), 7.44 – 7.35 (m, 5H), 7.22 (dp,  $J = 5.9, 2.2$  Hz, 3H), 7.14 – 7.07 (m, 2H), 7.07 – 7.01 (m, 1H), 7.01 – 6.93 (m, 2H), 5.51 (d,  $J = 14.6$  Hz, 1H), 4.40 (d,  $J = 14.5$  Hz, 1H), 3.58 (s, 3H).  $^{13}\text{C}$  NMR (101 MHz,  $\text{CDCl}_3$ ) 182.9, 178.9, 156.9, 146.5, 142.9, 142.3, 137.7, 136.1, 134.0, 133.7, 133.6, 132.4, 132.2, 129.3, 128.4, 128.3, 125.8, 125.8, 125.7, 123.7, 122.8, 122.4, 121.8, 118.3, 110.6, 58.1, 52.4, 31.8. HRMS (ESI) Calcd for  $\text{C}_{33}\text{H}_{23}\text{NNaO}_4\text{S}^+[\text{M}+\text{Na}]^+$ : 552.1245, Found: 552.1248.

**6-(((4-fluorophenyl)sulfonyl)methyl)-5-methyl-6-phenyl-5,6-dihydrobenzo[5,6]indeno[2,1-*b*]indole-7,12-dione (32)**

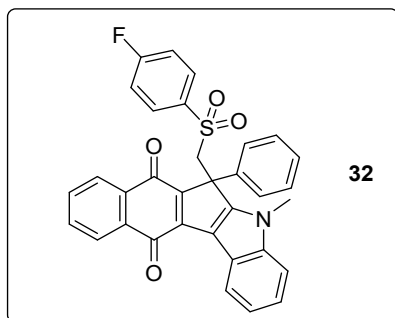

Blue solid, m.p. 270-271 °C, yield: 56.9 mg, 52% yield; Rf: 0.40 (EA:PE =1:3).  $^1\text{H}$  NMR (400 MHz,  $\text{CDCl}_3$ )  $\delta$  8.51 – 8.43 (m, 1H), 8.10 – 8.01 (m, 1H), 7.92 – 7.82 (m,

1H), 7.71 – 7.59 (m, 2H), 7.45 – 7.35 (m, 5H), 7.25 – 7.18 (m, 3H), 7.11 (dt,  $J = 5.6$ , 4.0 Hz, 2H), 6.67 – 6.57 (m, 2H), 5.50 (d,  $J = 14.6$  Hz, 1H), 4.40 (d,  $J = 14.6$  Hz, 1H), 3.61 (s, 3H).  $^{13}\text{C}$  NMR (101 MHz,  $\text{CDCl}_3$ ) 182.8, 178.9, 167.0, 164.4, 157.0, 146.6, 143.0, 142.2, 135.9, 133.9, 133.9, 133.7, 133.7, 132.6, 132.0, 131.4, 131.3, 129.4, 128.5, 126.0, 125.8, 125.6, 123.9, 122.9, 122.6, 121.7, 118.3, 115.8, 115.6, 110.6, 77.4, 77.0, 76.7, 58.3, 52.4, 31.8.  $^{19}\text{F}$  NMR (376 MHz,  $\text{CDCl}_3$ ) -102.4. HRMS (ESI) Calcd for  $\text{C}_{33}\text{H}_{22}\text{FNNaO}_4\text{S}^+[\text{M}+\text{Na}]^+$ : 570.1151, Found: 570.1155.

**6-(((4-chlorophenyl)sulfonyl)methyl)-5-methyl-6-phenyl-5,6-dihydrobenzo[5,6]indeno[2,1-*b*]indole-7,12-dione (33)**

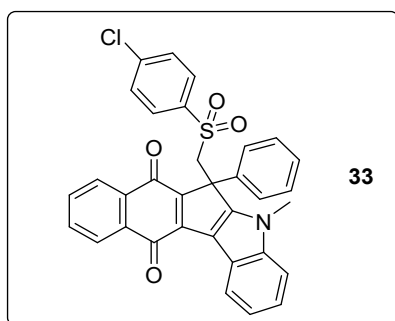

Blue solid, m.p. 225-226 °C, yield: 66.44 mg, 59% yield; R<sub>f</sub>: 0.46 (EA:PE =1:3).  $^1\text{H}$  NMR (400 MHz,  $\text{CDCl}_3$ )  $\delta$  8.47 (s, 1H), 8.08 (d,  $J = 7.2$  Hz, 1H), 7.86 (d,  $J = 7.2$  Hz, 1H), 7.64 (q,  $J = 7.5$  Hz, 2H), 7.43 (d,  $J = 10.4$  Hz, 3H), 7.29 (s, 1H), 7.28 – 7.22 (m, 4H), 7.14 – 7.07 (m, 2H), 6.90 (d,  $J = 8.1$  Hz, 2H), 5.50 (d,  $J = 14.6$  Hz, 1H), 4.40 (d,  $J = 14.6$  Hz, 1H), 3.62 (s, 3H).  $^{13}\text{C}$  NMR (101 MHz,  $\text{CDCl}_3$ ) 182.7, 178.9, 156.9, 146.7, 143.0, 142.1, 141.0, 135.9, 135.9, 134.0, 133.8, 132.6, 132.0, 129.8, 129.4, 128.8, 128.5, 126.2, 125.7, 125.6, 124.0, 122.9, 122.6, 121.7, 118.3, 110.7, 58.3, 52.4, 31.9. HRMS (ESI) Calcd for  $\text{C}_{33}\text{H}_{22}\text{ClNaO}_4\text{S}^+[\text{M}+\text{Na}]^+$ : 586.0856, Found: 586.0855.

**6-(((4-bromophenyl)sulfonyl)methyl)-5-methyl-6-phenyl-5,6-dihydrobenzo[5,6]indeno[2,1-*b*]indole-7,12-dione (34)**

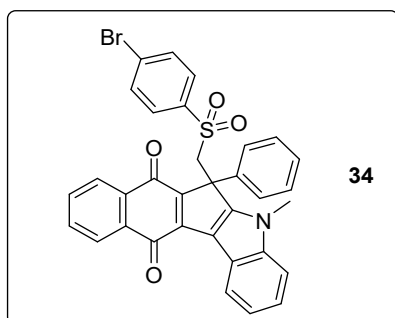

Blue solid, m.p. 233-234 °C, yield: 63.1 mg, 52% yield; Rf: 0.46 (EA:PE =1:3). <sup>1</sup>H NMR (400 MHz, CDCl<sub>3</sub>) δ 8.47 (t, *J* = 3.7 Hz, 1H), 8.10 (d, *J* = 5.8 Hz, 1H), 7.87 (d, *J* = 8.9 Hz, 1H), 7.73 – 7.60 (m, 2H), 7.43 (d, *J* = 3.3 Hz, 3H), 7.26 – 7.16 (m, 5H), 7.15 – 7.05 (m, 4H), 5.51 (d, *J* = 14.6 Hz, 1H), 4.39 (d, *J* = 14.6 Hz, 1H), 3.63 (s, 3H). <sup>13</sup>C NMR (101 MHz, CDCl<sub>3</sub>) 182.7, 178.9, 156.9, 146.7, 143.0, 142.1, 136.4, 135.9, 134.0, 133.8, 132.7, 132.0, 131.8, 129.8, 129.8, 129.4, 128.5, 126.3, 125.7, 125.6, 124.0, 122.9, 122.6, 121.7, 118.3, 110.7, 58.2, 52.4, 31.9. HRMS (ESI) Calcd for C<sub>33</sub>H<sub>22</sub>BrNNaO<sub>4</sub>S<sup>+</sup>[M+Na]<sup>+</sup>: 630.0351, Found: 630.0352.

**5-methyl-6-phenyl-6-((*m*-tolylsulfonyl)methyl)-5,6-dihydrobenzo[5,6]indeno[2,1-*b*]indole-7,12-dione (35)**

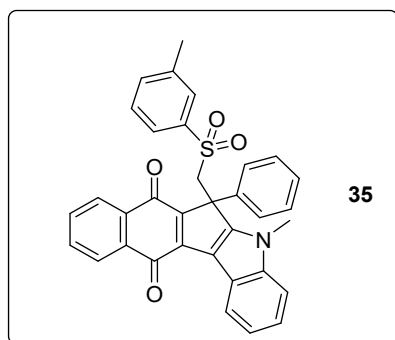

Blue solid, m.p. 282-283°C, yield: 63.0 mg, 58% yield; Rf: 0.39 (EA:PE =1:3). <sup>1</sup>H NMR (400 MHz, CDCl<sub>3</sub>) δ 8.50 – 8.43 (m, 1H), 8.00 (d, *J* = 7.6 Hz, 1H), 7.88 (d, *J* = 6.6 Hz, 1H), 7.68 – 7.57 (m, 2H), 7.41 (d, *J* = 3.8 Hz, 3H), 7.28 – 7.16 (m, 4H), 7.15 – 7.05 (m, 3H), 6.84 (t, *J* = 7.6 Hz, 1H), 6.79 (d, *J* = 7.7 Hz, 1H), 5.50 (d, *J* = 14.5 Hz, 1H), 4.39 (d, *J* = 14.6 Hz, 1H), 3.59 (s, 3H), 1.91 (s, 3H). <sup>13</sup>C NMR (101 MHz, CDCl<sub>3</sub>) 182.6, 178.9, 156.9, 146.4, 143.0, 142.3, 139.1, 137.4, 136.2, 134.6, 134.0, 133.6, 132.4, 132.2, 129.3, 129.0, 128.4, 128.3, 125.8, 125.7, 125.7, 123.8, 122.9, 122.4, 121.8, 118.4, 110.7, 58.1, 52.4, 31.8, 20.7. HRMS (ESI) Calcd for C<sub>34</sub>H<sub>25</sub>NNaO<sub>4</sub>S<sup>+</sup>[M+Na]<sup>+</sup>: 566.1402, Found: 566.1407.

**5-methyl-6-phenyl-6-((*o*-tolylsulfonyl)methyl)-5,6-dihydrobenzo[5,6]indeno[2,1-*b*]indole-7,12-dione (36)**

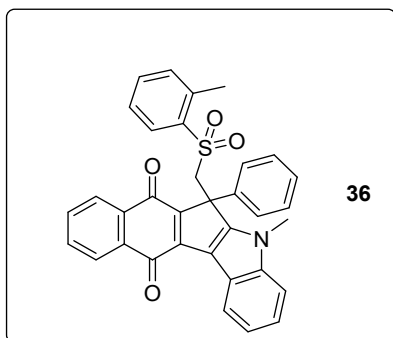

Blue solid, m.p. 280-281 °C, yield: 57.6 mg, 53% yield; Rf: 0.41 (EA:PE =1:3). <sup>1</sup>H NMR (400 MHz, CDCl<sub>3</sub>) δ 8.49 – 8.41 (m, 1H), 8.01 – 7.94 (m, 1H), 7.89 – 7.81 (m, 1H), 7.60 (tt, *J* = 7.4, 5.6 Hz, 2H), 7.41 (d, *J* = 3.4 Hz, 3H), 7.24 – 7.19 (m, 3H), 7.15 – 7.08 (m, 3H), 6.86 – 6.76 (m, 2H), 6.67 (d, *J* = 6.7 Hz, 1H), 5.51 (d, *J* = 14.6 Hz, 1H), 4.37 (d, *J* = 14.5 Hz, 1H), 3.66 (s, 3H), 2.56 (s, 3H). <sup>13</sup>C NMR (101 MHz, CDCl<sub>3</sub>) 182.9, 178.5, 157.6, 146.5, 143.1, 142.1, 138.7, 136.3, 135.9, 134.0, 133.7, 133.6, 132.3, 132.2, 132.2, 130.8, 129.3, 128.4, 125.9, 125.7, 125.7, 125.6, 123.7, 122.8, 122.4, 121.8, 118.3, 110.7, 77.4, 77.1, 76.8, 56.8, 52.4, 31.9, 20.2. HRMS (ESI) Calcd for C<sub>34</sub>H<sub>25</sub>NNaO<sub>4</sub>S<sup>+</sup>[M+Na]<sup>+</sup>: 566.1402, Found: 566.1407.

**5-methyl-6-((naphthalen-1-ylsulfonyl)methyl)-6-phenyl-5,6-dihydrobenzo[5,6]indeno[2,1-*b*]indole-7,12-dione (37)**

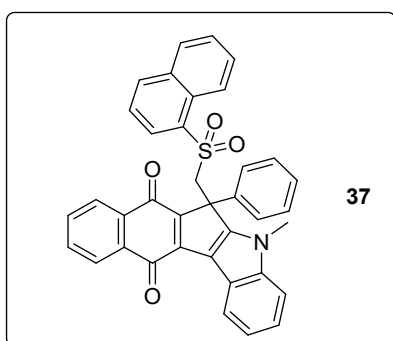

Blue solid, m.p. 282-283 °C, yield: 93.8mg, 81% yield; Rf: 0.46 (EA:PE =1:3). <sup>1</sup>H NMR (400 MHz, CDCl<sub>3</sub>) δ 8.61 (d, *J* = 8.7 Hz, 1H), 8.46 – 8.36 (m, 1H), 7.90 (dd, *J* = 7.7, 1.3 Hz, 1H), 7.62 – 7.34 (m, 8H), 7.30 – 7.24 (m, 3H), 7.21 – 7.16 (m, 3H), 7.07 (dt, *J* = 5.5, 4.0 Hz, 2H), 7.01 – 6.92 (m, 1H), 5.66 (d, *J* = 14.5 Hz, 1H), 4.57 (d, *J* = 14.5 Hz, 1H), 3.50 (s, 3H). <sup>13</sup>C NMR (101 MHz, CDCl<sub>3</sub>) 182.6, 178.0, 156.3, 145.7, 142.9, 142.6, 136.3, 135.7, 133.4, 133.2, 133.1, 132.1, 132.0, 131.9, 131.5, 129.2,

128.8, 128.6, 128.5, 128.3, 126.8, 125.9, 125.7, 125.4, 123.9, 123.8, 123.7, 122.7, 122.4, 121.6, 118.7, 110.6, 57.8, 52.3, 31.9. HRMS (ESI) Calcd for  $C_{37}H_{25}NNaO_4S^+[M+Na]^+$ : 602.1402, Found: 602.1406.

**5-methyl-6-phenyl-6-((thiophen-2-ylsulfonyl)methyl)-5,6-dihydrobenzo[5,6]indeno[2,1-b]indole-7,12-dione (38)**

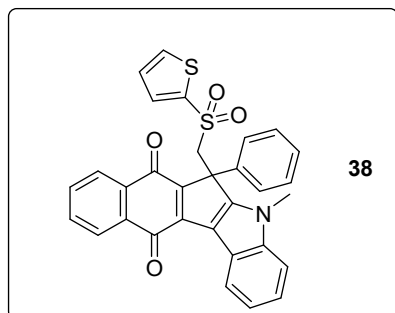

Blue solid, m.p. 239-240 °C, yield: 88.8 mg, 83% yield; Rf: 0.31 (EA:PE =1:3).  $^1H$  NMR (400 MHz,  $CDCl_3$ )  $\delta$  8.48 (dt,  $J = 5.8, 2.9$  Hz, 1H), 8.07 (dd,  $J = 7.2, 1.8$  Hz, 1H), 7.98 – 7.89 (m, 1H), 7.70 – 7.58 (m, 2H), 7.46 – 7.34 (m, 3H), 7.25 – 7.17 (m, 4H), 7.12 (dd,  $J = 6.7, 3.1$  Hz, 2H), 7.08 (d,  $J = 3.8$  Hz, 1H), 6.58 – 6.52 (m, 1H), 5.57 (d,  $J = 14.6$  Hz, 1H), 4.50 (d,  $J = 14.6$  Hz, 1H), 3.57 (s, 3H).  $^{13}C$  NMR (101 MHz,  $CDCl_3$ ) 183.0, 179.0, 156.6, 146.6, 142.9, 142.7, 139.0, 136.0, 135.1, 134.2, 134.1, 133.8, 132.4, 132.3, 129.4, 128.4, 127.5, 125.9, 125.9, 125.7, 123.7, 122.9, 122.4, 121.8, 118.5, 110.5, 59.8, 52.6, 31.7. HRMS (ESI) Calcd for  $C_{31}H_{21}NNaO_4S_2^+[M+Na]^+$ : 558.0810, Found: 558.0812.

**(E)-1-((2-chloro-2-phenylvinyl)sulfonyl)-4-methylbenzene (39)**

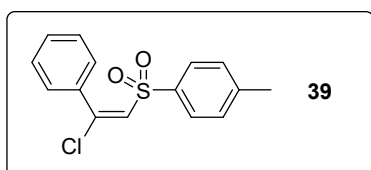

White solid, m.p. 118-119 °C, yield: 5.2 mg, 9% yield; Rf: 0.26 (EA:PE =1:3).  $^1H$  NMR (400 MHz,  $CDCl_3$ )  $\delta$  7.97 – 7.90 (m, 2H), 7.64 – 7.56 (m, 2H), 7.50 – 7.43 (m, 1H), 7.43 – 7.33 (m, 4H), 7.12 (s, 1H), 2.45 (s, 3H).  $^{13}C$  NMR (101 MHz,  $CDCl_3$ ) 146.0, 144.9, 137.9, 135.3, 131.6, 129.8, 129.1, 128.8, 128.3, 128.0, 127.7, 127.2, 21.7.

**2-(1-methyl-1*H*-indol-3-yl)-3-(1-phenyl-2-tosylvinyl)naphthalene-1,4-dione (41)**

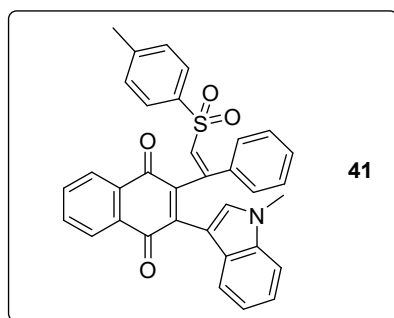

Purple solid, m.p. 139-140 °C, yield: 15.2 mg, 14% yield; Rf: 0.26 (EA:PE =1:3). <sup>1</sup>H NMR (400 MHz, CDCl<sub>3</sub>) δ 8.14 (t, *J* = 6.4 Hz, 2H), 7.80 – 7.70 (m, 2H), 7.41 (d, *J* = 8.2 Hz, 2H), 7.32 – 7.23 (m, 3H), 7.15 – 7.10 (m, 1H), 7.05 (d, *J* = 8.3 Hz, 3H), 6.99 (d, *J* = 7.4 Hz, 1H), 6.89 – 6.79 (m, 3H), 6.62 (d, *J* = 6.8 Hz, 2H), 3.76 (s, 3H), 2.32 (s, 3H). <sup>13</sup>C NMR (101 MHz, CDCl<sub>3</sub>) 184.6, 182.6, 146.6, 143.7, 142.5, 141.8, 138.1, 136.7, 135.7, 134.7, 134.0, 133.8, 132.4, 132.1, 132.1, 129.2, 128.8, 128.3, 127.6, 127.3, 126.8, 126.7, 122.6, 121.0, 120.8, 109.6, 107.5, 33.2, 21.5. HRMS (ESI) Calcd for C<sub>34</sub>H<sub>26</sub>NO<sub>4</sub>S<sup>+</sup>[M+H]<sup>+</sup>: 544.1583, Found: 544.1583.

**5-methyl-7-phenyl-5H-naphtho[2,3-*c*]carbazole-8,13-dione (42)**

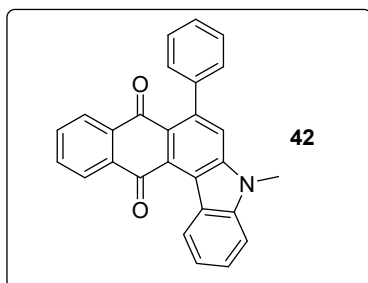

Yellow solid, m.p. 279-280 °C, yield: 1.5 mg, 2% yield; Rf: 0.71 (EA:PE =1:3). <sup>1</sup>H NMR (400 MHz, CDCl<sub>3</sub>) δ 9.45 (d, *J* = 8.3 Hz, 1H), 8.33 (d, *J* = 7.5 Hz, 1H), 8.11 – 8.05 (m, 1H), 7.72 (ddd, *J* = 20.2, 8.2, 6.5 Hz, 2H), 7.62 (t, *J* = 7.6 Hz, 1H), 7.53 (s, 1H), 7.52 – 7.37 (m, 7H), 3.88 (d, *J* = 1.7 Hz, 3H). <sup>13</sup>C NMR (101 MHz, CDCl<sub>3</sub>) 186.0, 183.7, 144.0, 143.9, 143.5, 142.5, 134.3, 134.2, 133.6, 133.2, 131.9, 128.2, 128.1, 128.1, 128.0, 126.8, 126.7, 126.6, 125.6, 122.3, 121.0, 120.7, 117.0, 108.7, 29.3. HRMS (ESI) Calcd for C<sub>27</sub>H<sub>18</sub>NO<sub>2</sub><sup>+</sup>[M+H]<sup>+</sup>: 388.1338, Found: 388.1339.

## 6. NMR Spectra of New Compounds

### 5-methyl-6-phenyl-6-(tosylmethyl)-5,6-dihydrobenzo[5,6]indeno[2,1-*b*]indole-7,12-dione (5)

$^1\text{H}$  NMR (400 MHz)

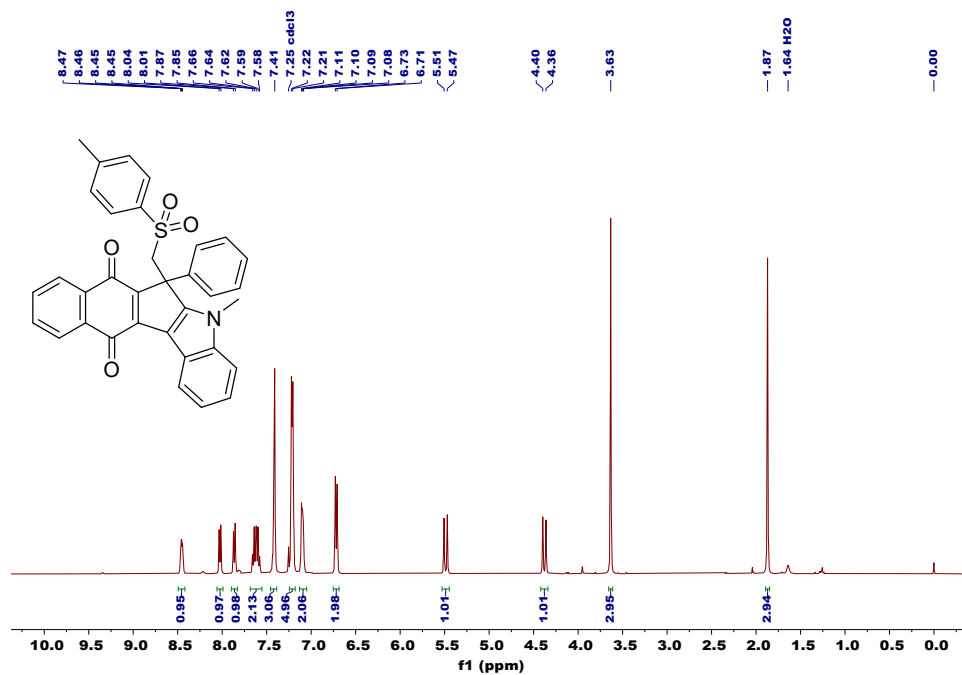

$^{13}\text{C}$   $\{^1\text{H}\}$  NMR (101 MHz)

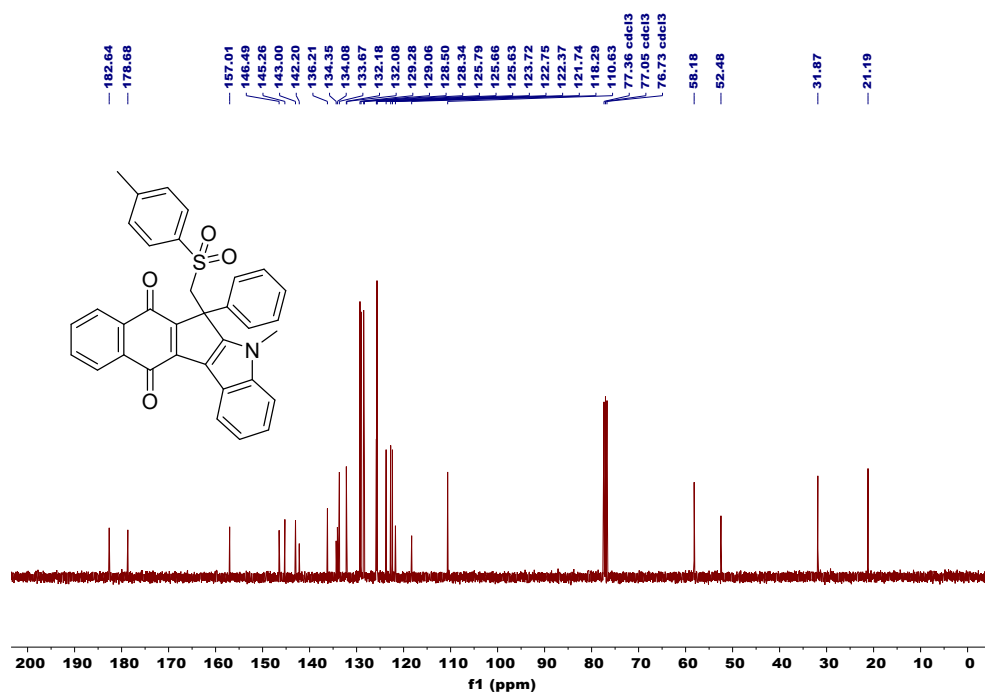



**5,8,11-trimethyl-6-phenyl-6-(tosylmethyl)-5,6-dihydrobenzo[5,6]indeno[2,1-*b*]indole-7,12-dione (6)**

**<sup>1</sup>H NMR (400 MHz)**

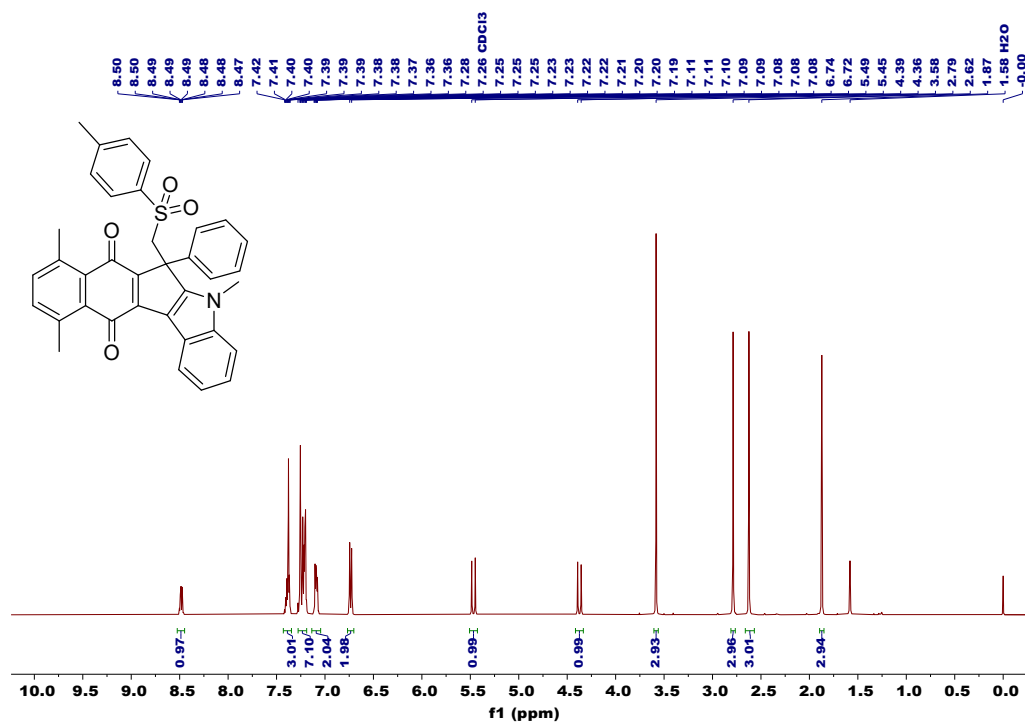

**<sup>13</sup>C {<sup>1</sup>H} NMR (101 MHz)**

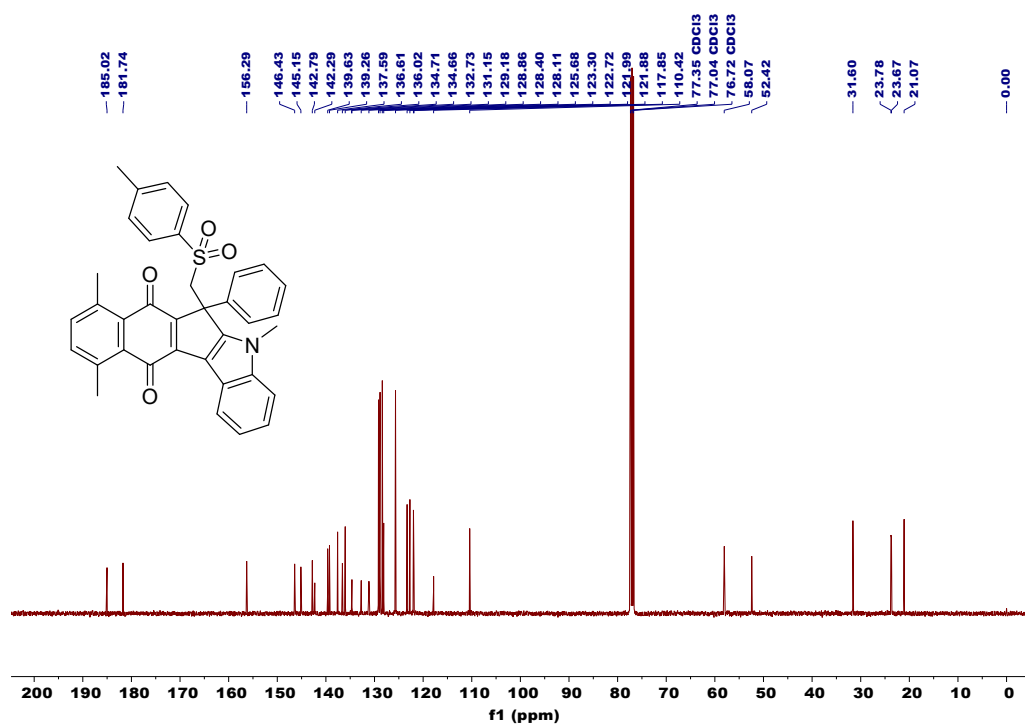

**5,9,10-trimethyl-6-phenyl-6-(tosylmethyl)-5,6-dihydrobenzo[5,6]indeno[2,1-*b*]indole-7,12-dione (7)**

**<sup>1</sup>H NMR (400 MHz)**

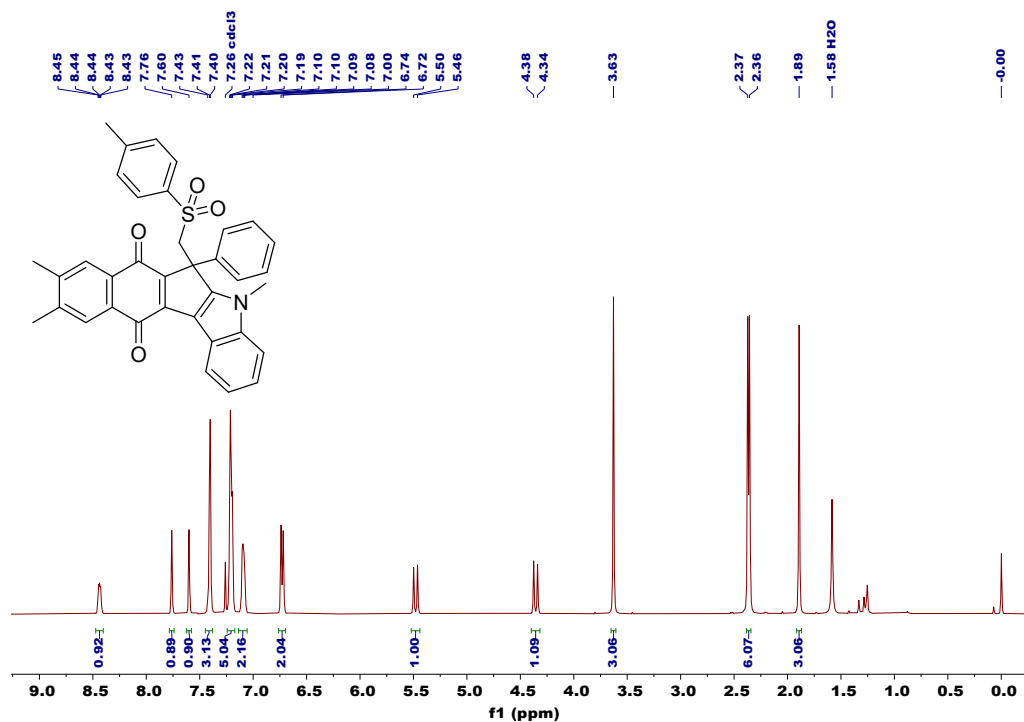

**<sup>13</sup>C {<sup>1</sup>H} NMR (101 MHz)**

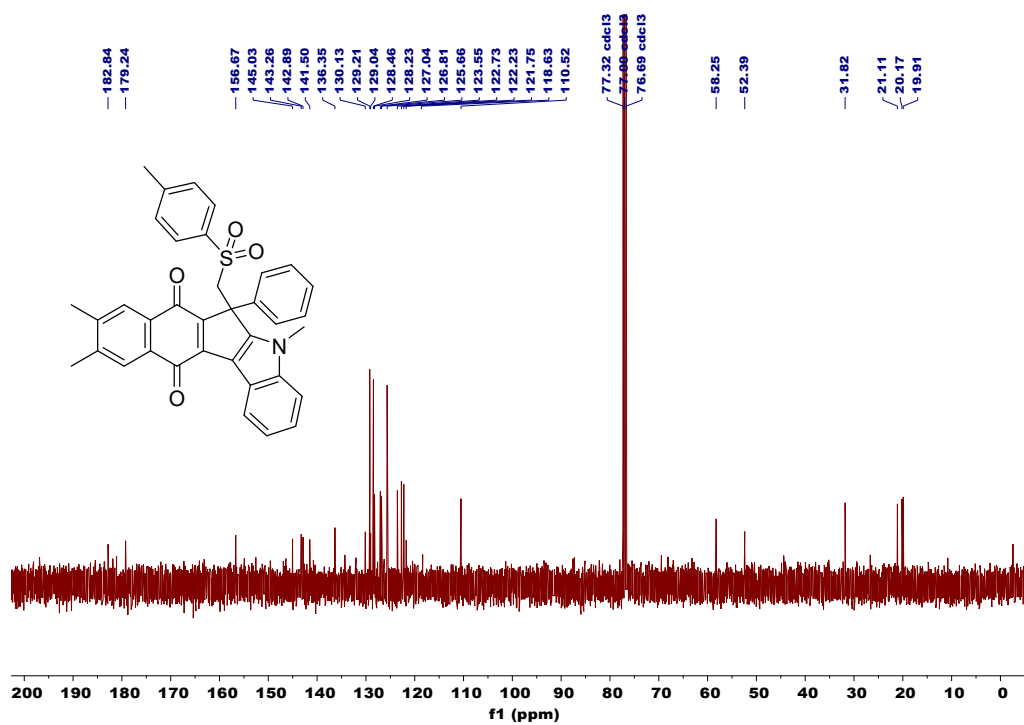

**9,10-dibromo-5-methyl-6-phenyl-6-(tosylmethyl)-5,6-dihydrobenzo[5,6]indeno[2,1-*b*]indole-7,12-dione (8)**

**<sup>1</sup>H NMR (400 MHz)**

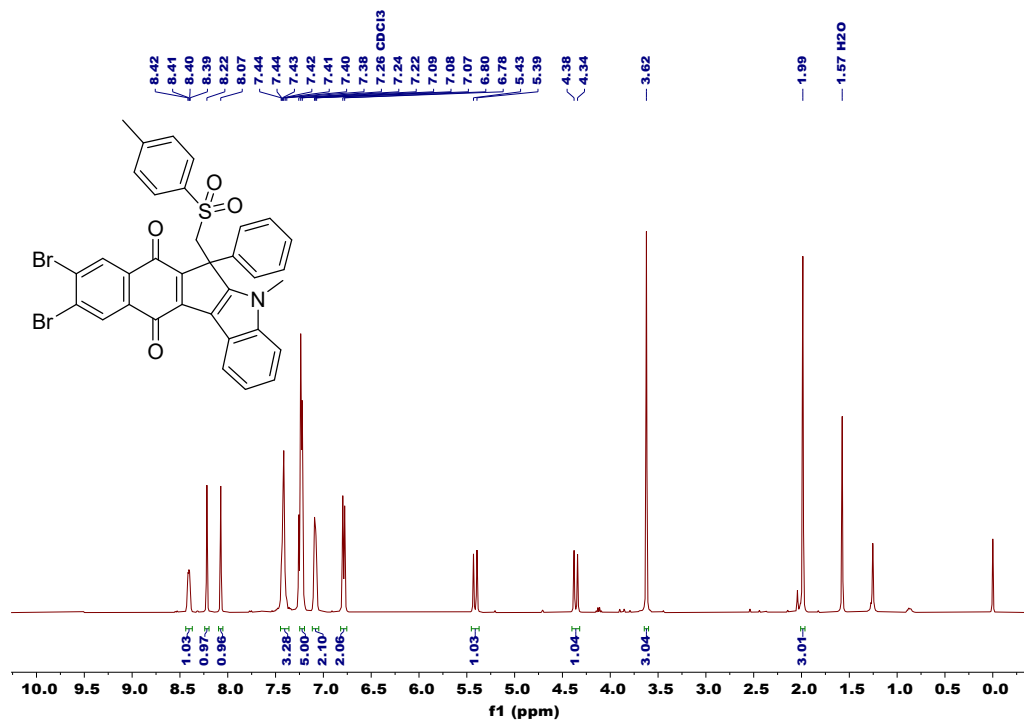

**<sup>13</sup>C {<sup>1</sup>H} NMR (101 MHz)**

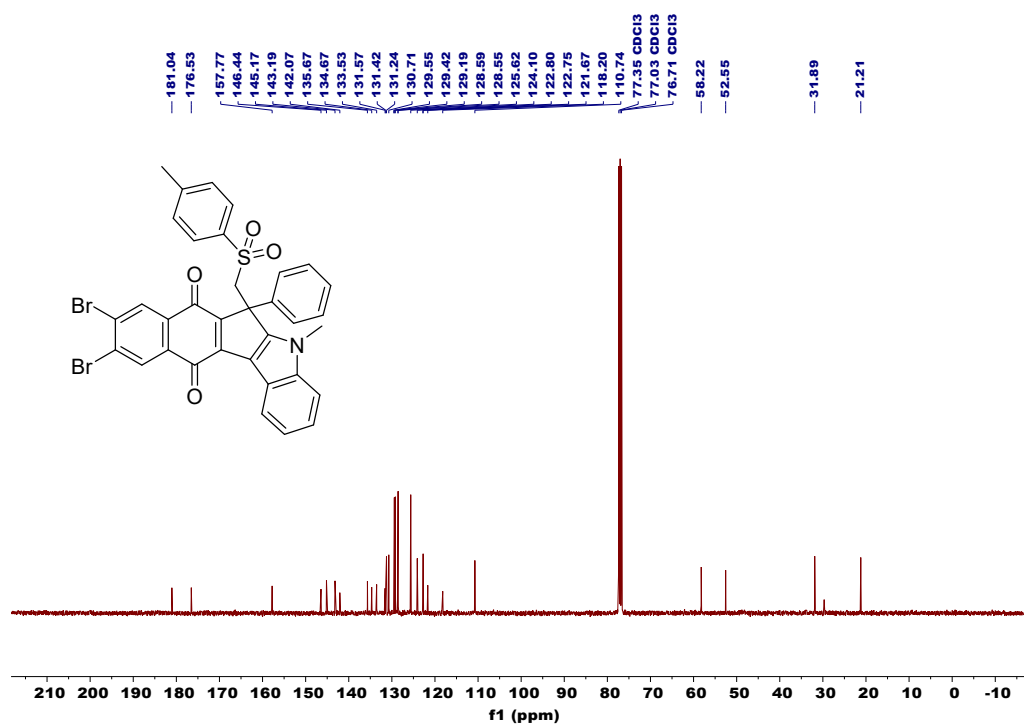

**5-methyl-6-phenyl-6-(tosylmethyl)-5,6-dihydronaphtho[2',3':5,6]indeno[2,1-b]indole-7,14-dione (9)**

**<sup>1</sup>H NMR (400 MHz)**

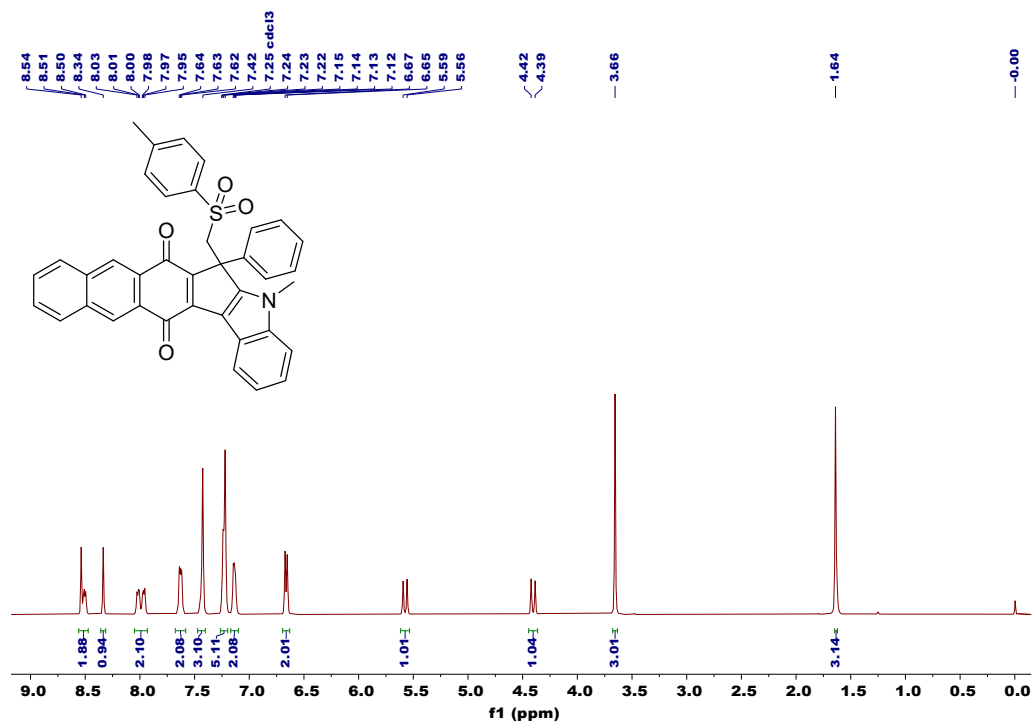

**<sup>13</sup>C {<sup>1</sup>H} NMR (101 MHz)**

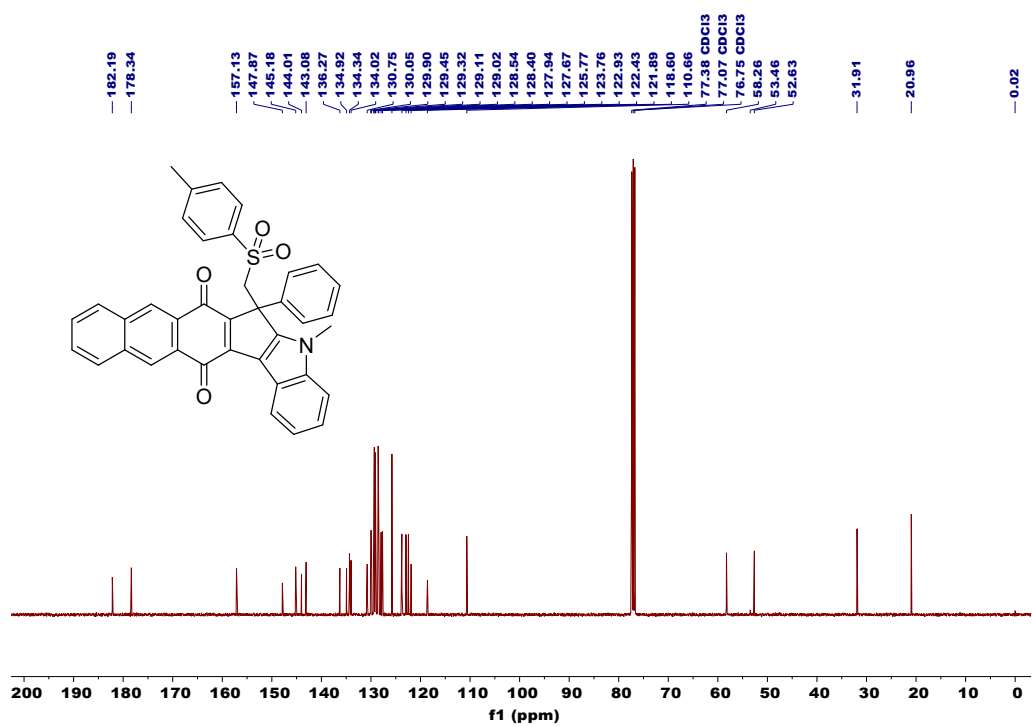

**1,5-dimethyl-6-phenyl-6-(tosylmethyl)-5,6-dihydrobenzo[5,6]indeno[2,1-*b*]indole-7,12-dione (10)**

**<sup>1</sup>H NMR (400 MHz)**

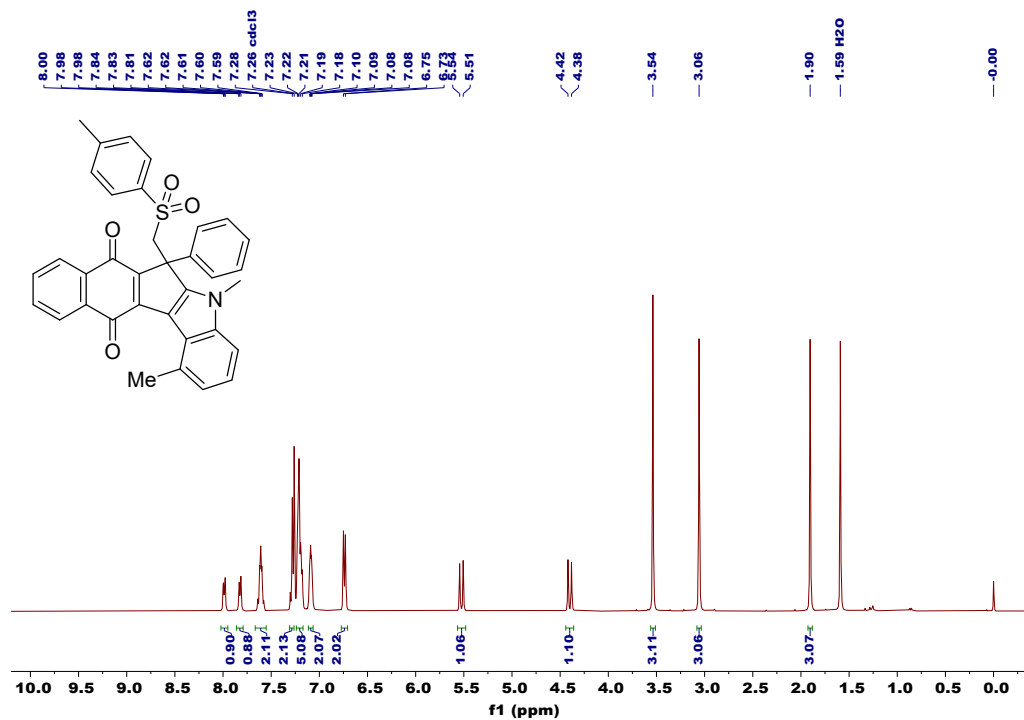

**<sup>13</sup>C {<sup>1</sup>H} NMR (101 MHz)**

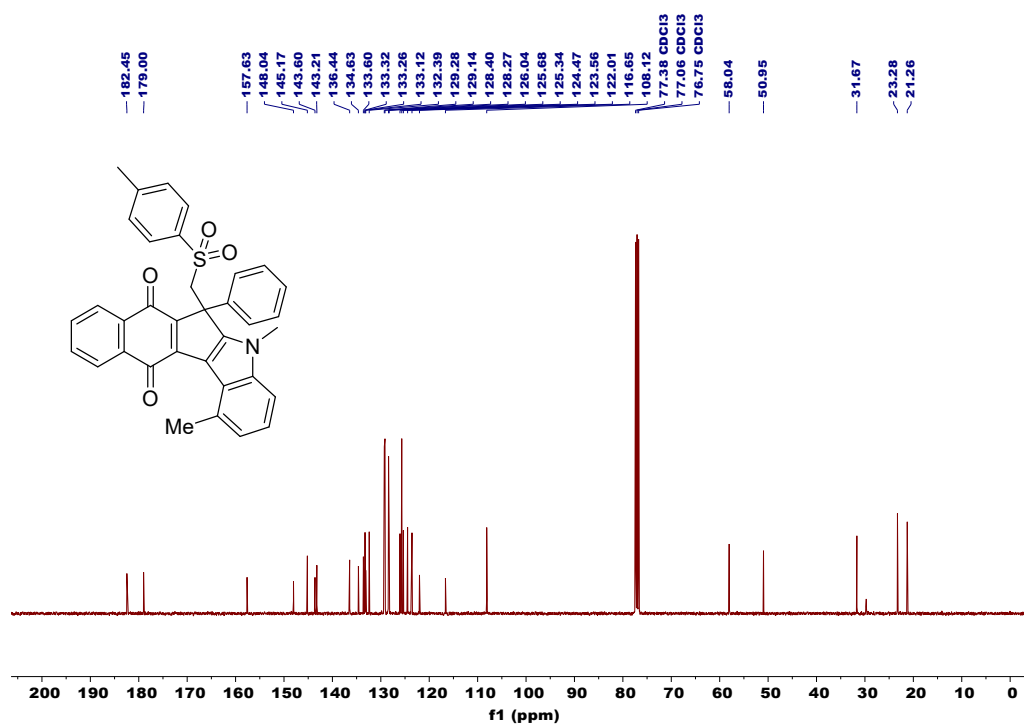

**2-methoxy-5-methyl-6-phenyl-6-(tosylmethyl)-5,6-dihydrobenzo[5,6]indeno[2,1-*b*]indole-7,12-dione (11)**

**<sup>1</sup>H NMR (400 MHz)**

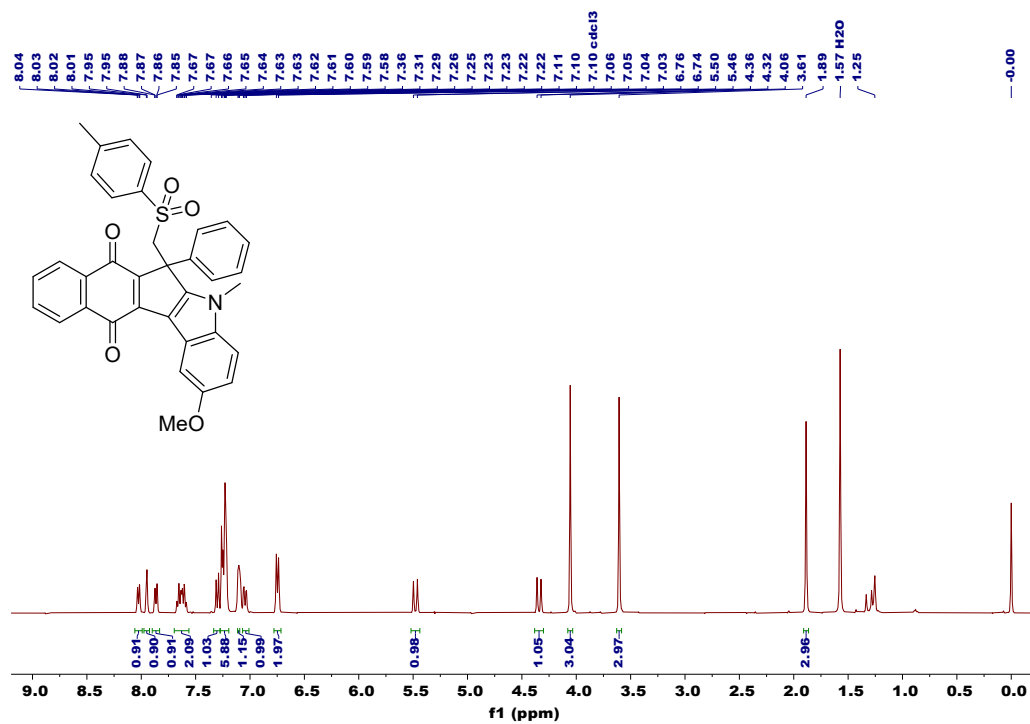

**<sup>13</sup>C {<sup>1</sup>H} NMR (101 MHz)**

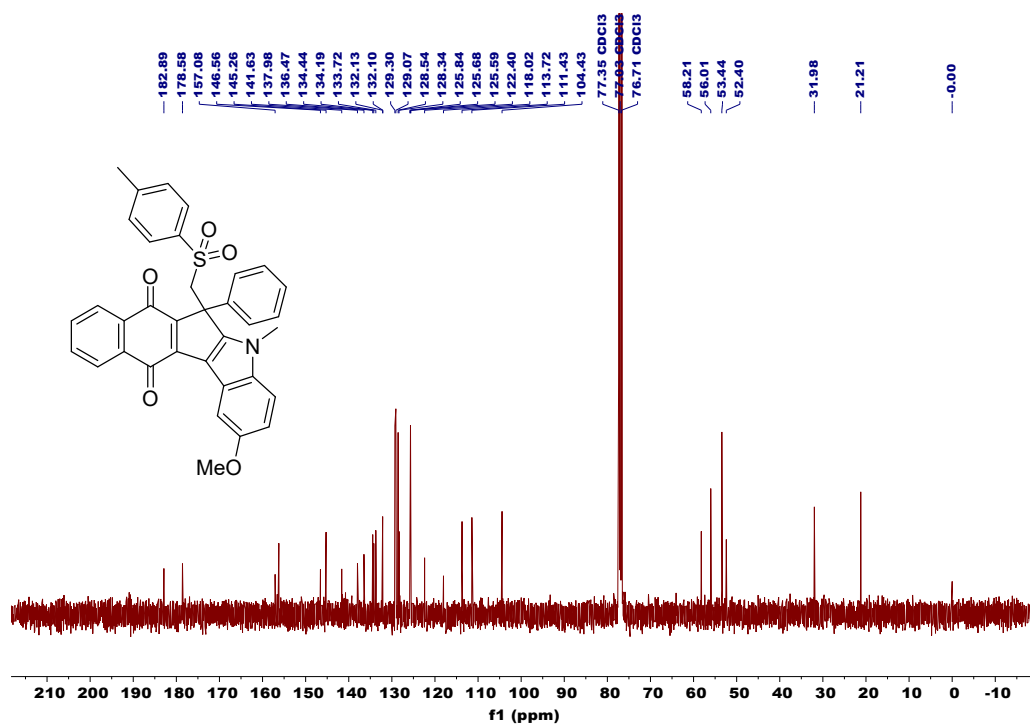

**2,5-dimethyl-6-phenyl-6-(tosylmethyl)-5,6-dihydrobenzo[5,6]indeno[2,1-*b*]indole-7,12-dione (12)**

**<sup>1</sup>H NMR (400 MHz)**

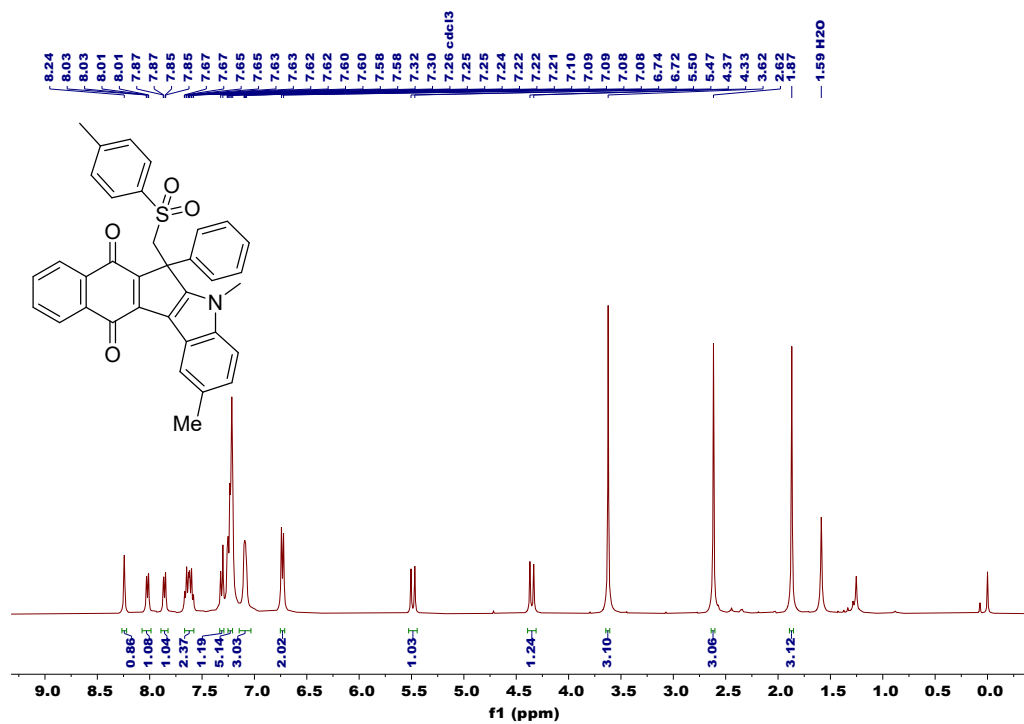

**<sup>13</sup>C {<sup>1</sup>H} NMR (101 MHz)**

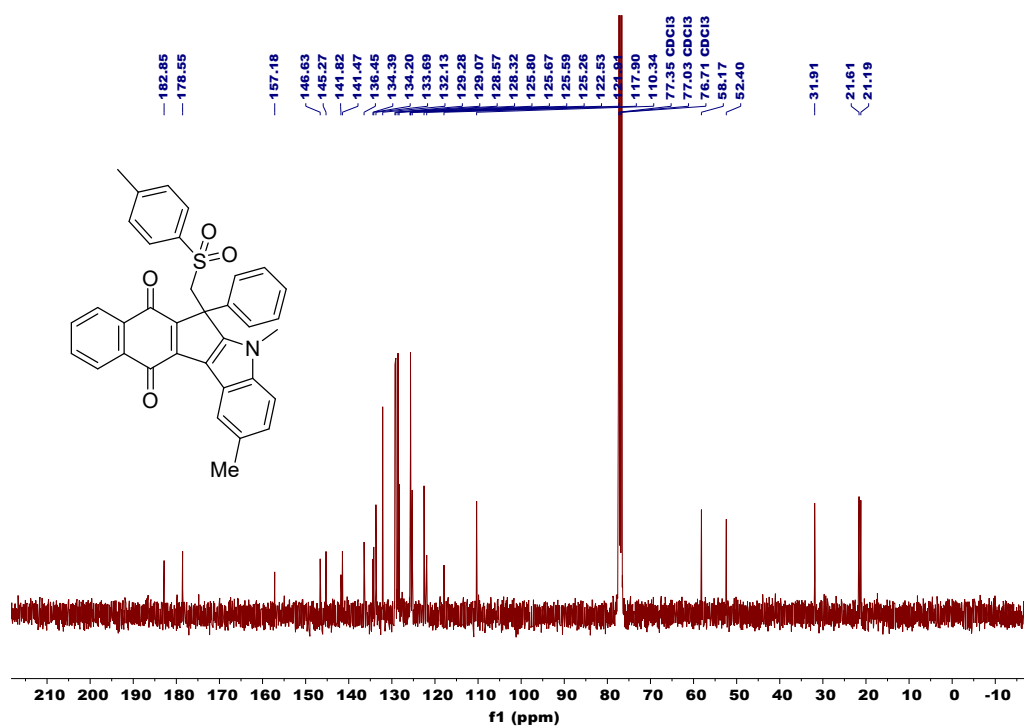

**3-methoxy-5-methyl-6-phenyl-6-(tosylmethyl)-5,6-dihydrobenzo[5,6]indeno[2,1-*b*]indole-7,12-dione (13)**

**<sup>1</sup>H NMR (400 MHz)**

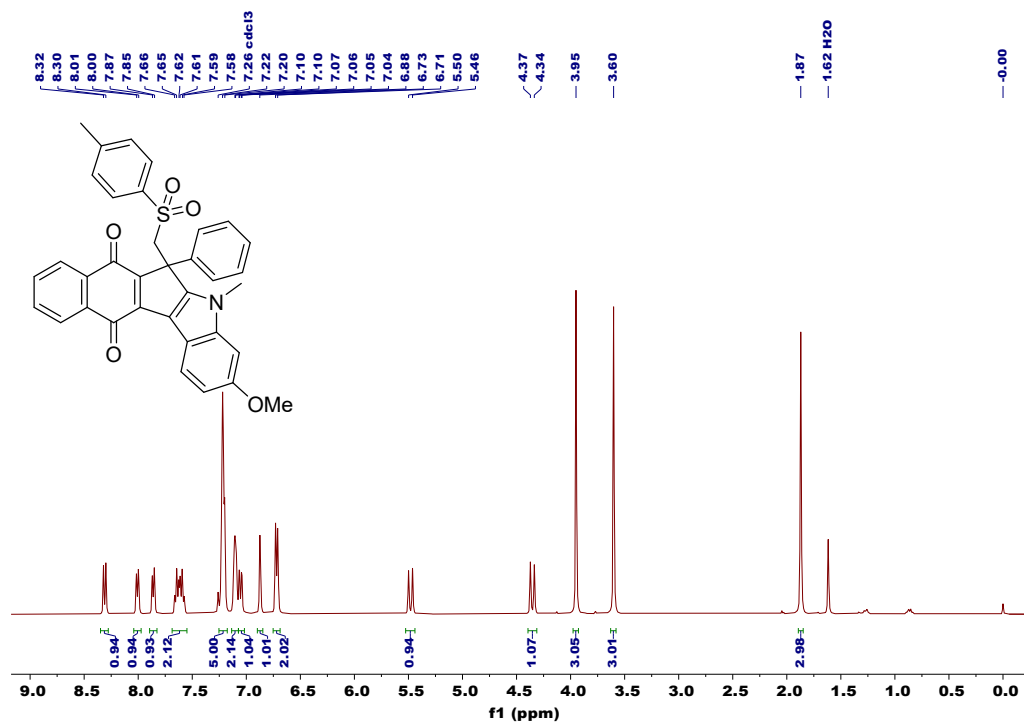

**<sup>13</sup>C {<sup>1</sup>H} NMR (101 MHz)**

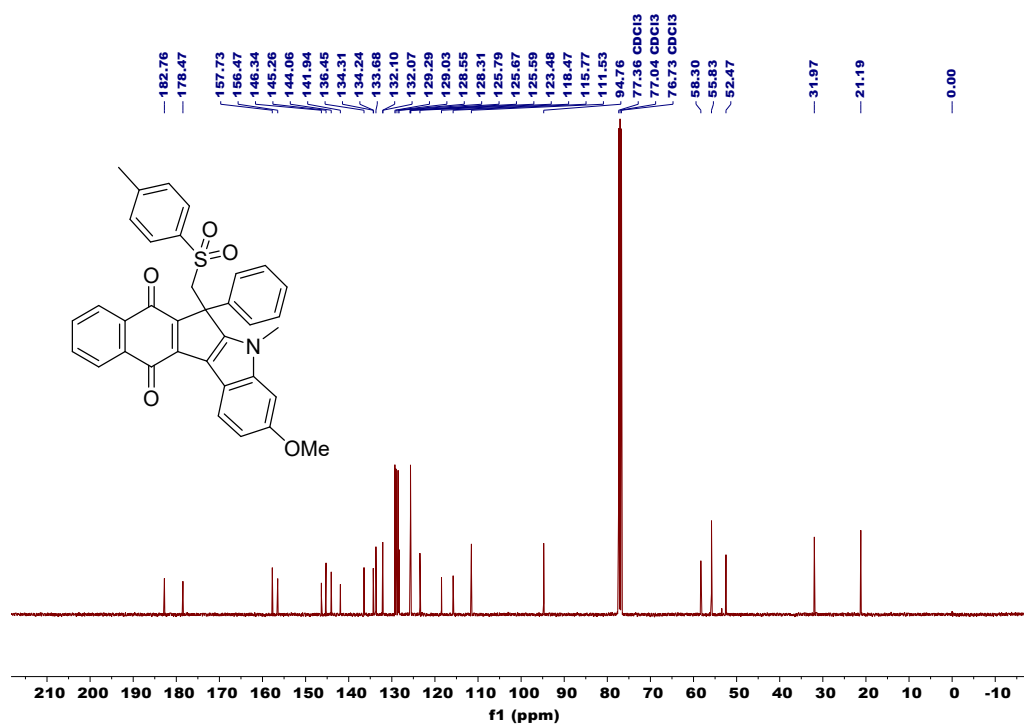



**3-chloro-5-methyl-6-phenyl-6-(tosylmethyl)-5,6-dihydrobenzo[5,6]indeno[2,1-*b*]indole-7,12-dione (14)**

**<sup>1</sup>H NMR (400 MHz)**

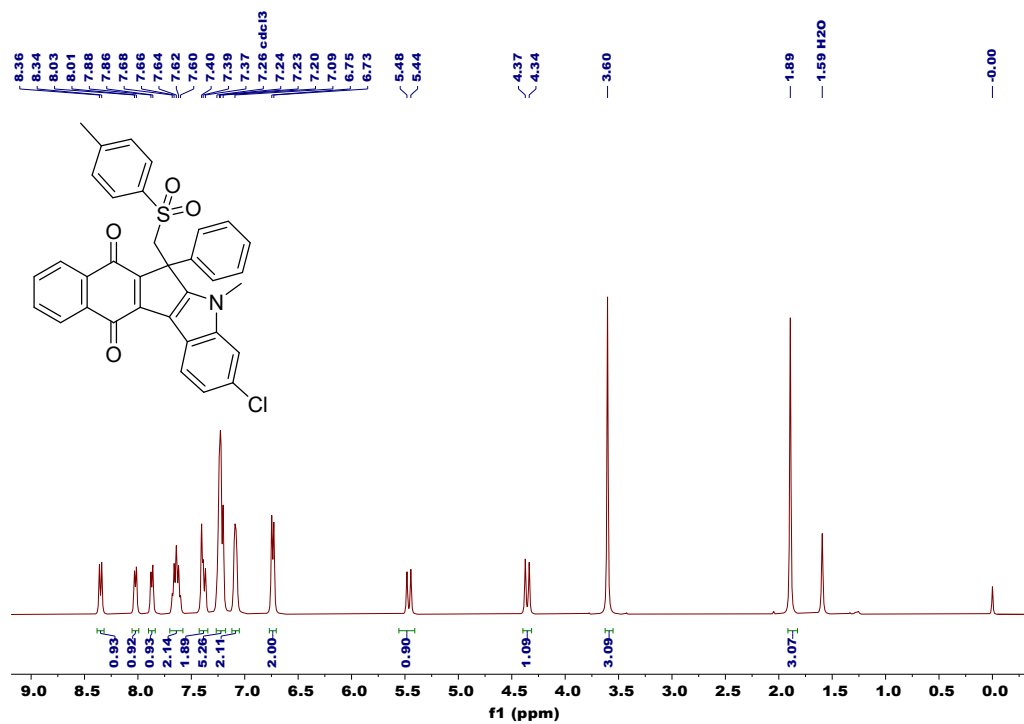

**<sup>13</sup>C {<sup>1</sup>H} NMR (101 MHz)**

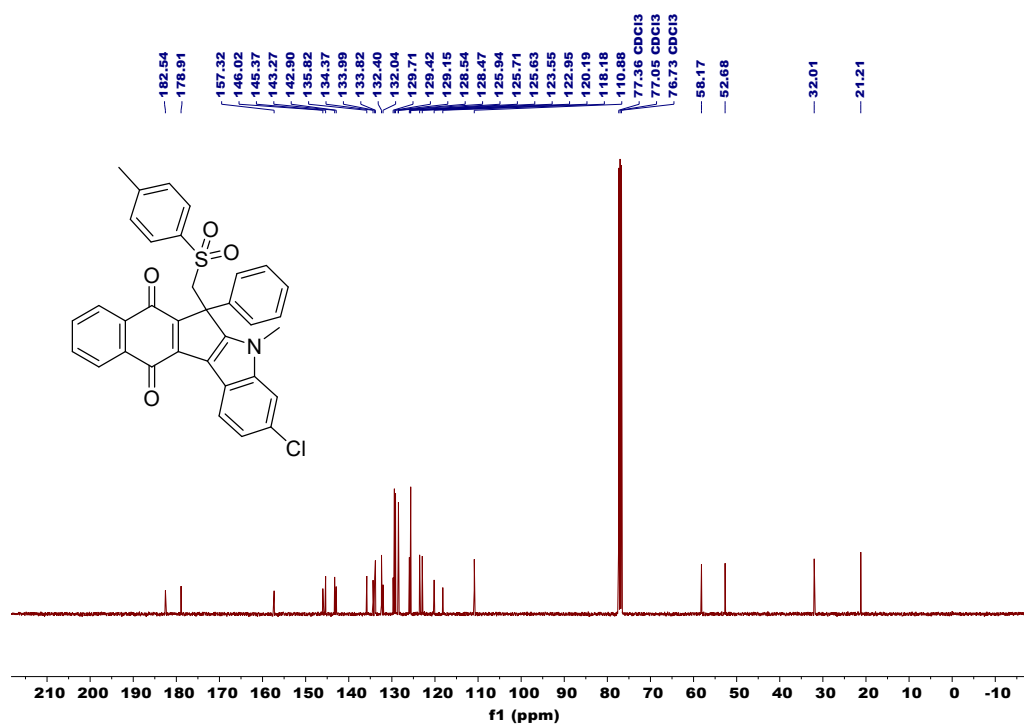

**3-bromo-5-methyl-6-phenyl-6-(tosylmethyl)-5,6-dihydrobenzo[5,6]indeno[2,1-b]indole-7,12-dione (15)**

$^1\text{H}$  NMR (400 MHz)

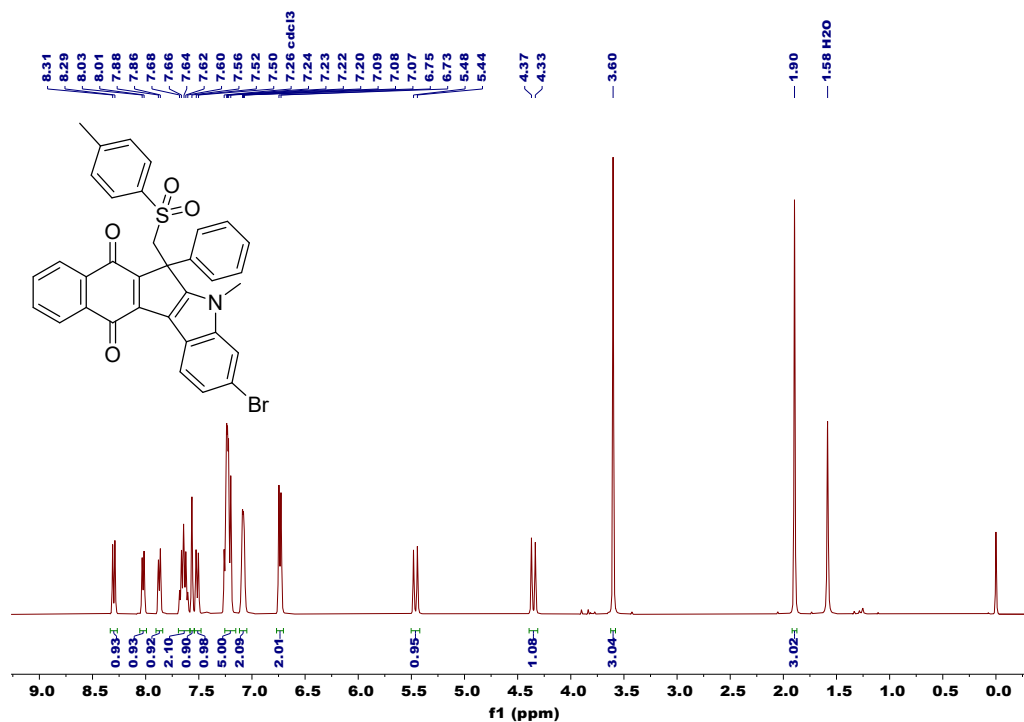

$^{13}\text{C}$  { $^1\text{H}$ } NMR (101 MHz)

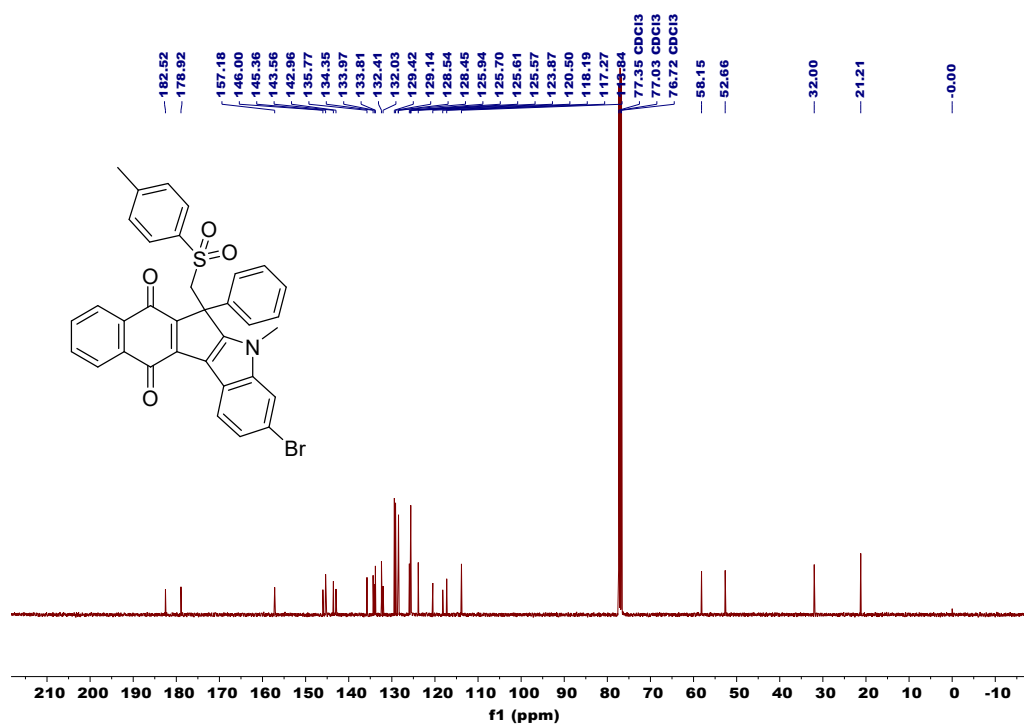

**4,5-dimethyl-6-phenyl-6-(tosylmethyl)-5,6-dihydrobenzo[5,6]indeno[2,1-*b*]indole-7,12-dione (16)**

**<sup>1</sup>H NMR (400 MHz)**

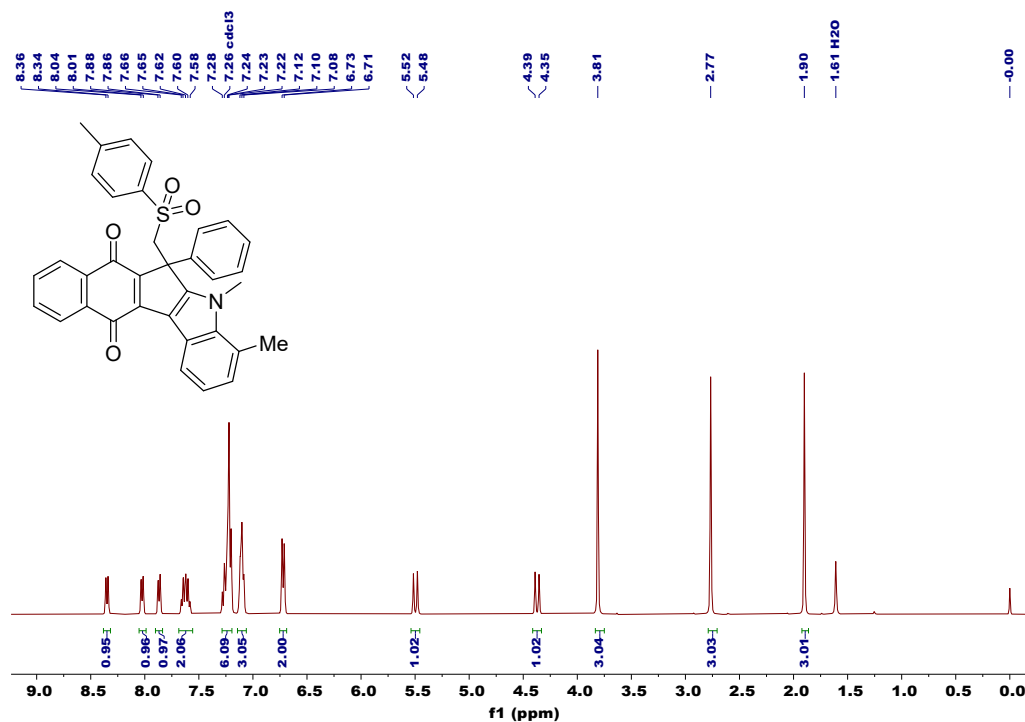

**<sup>13</sup>C {<sup>1</sup>H} NMR (101 MHz)**

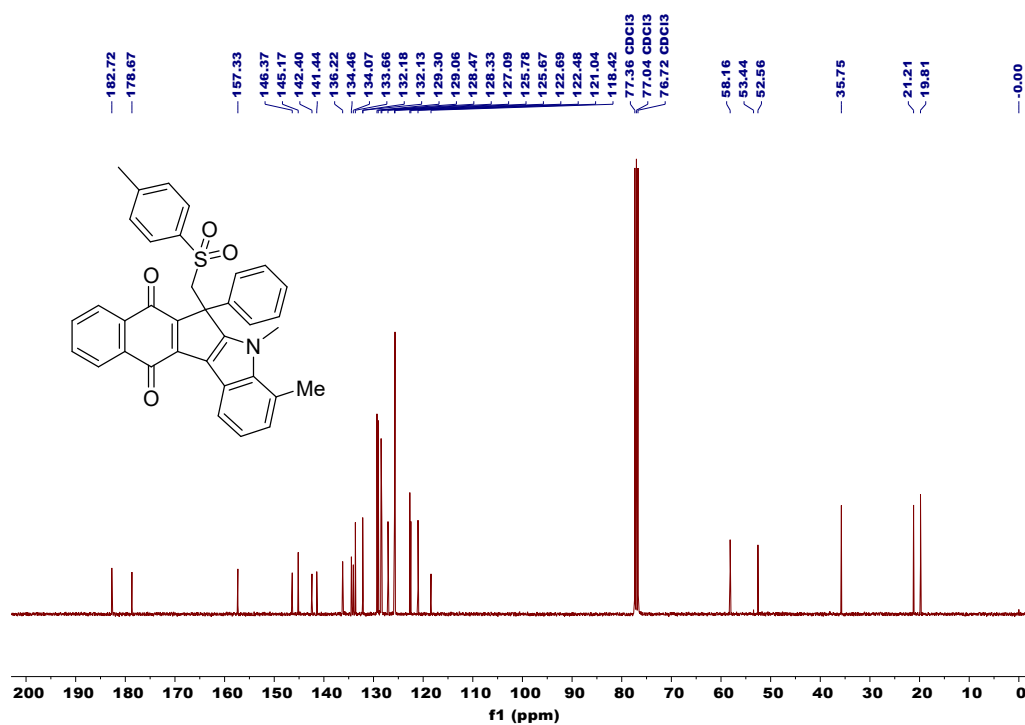

**6-phenyl-6-(tosylmethyl)-5,6-dihydrobenzo[5,6]indeno[2,1-b]indole-7,12-dione (17)**

**<sup>1</sup>H NMR (400 MHz)**

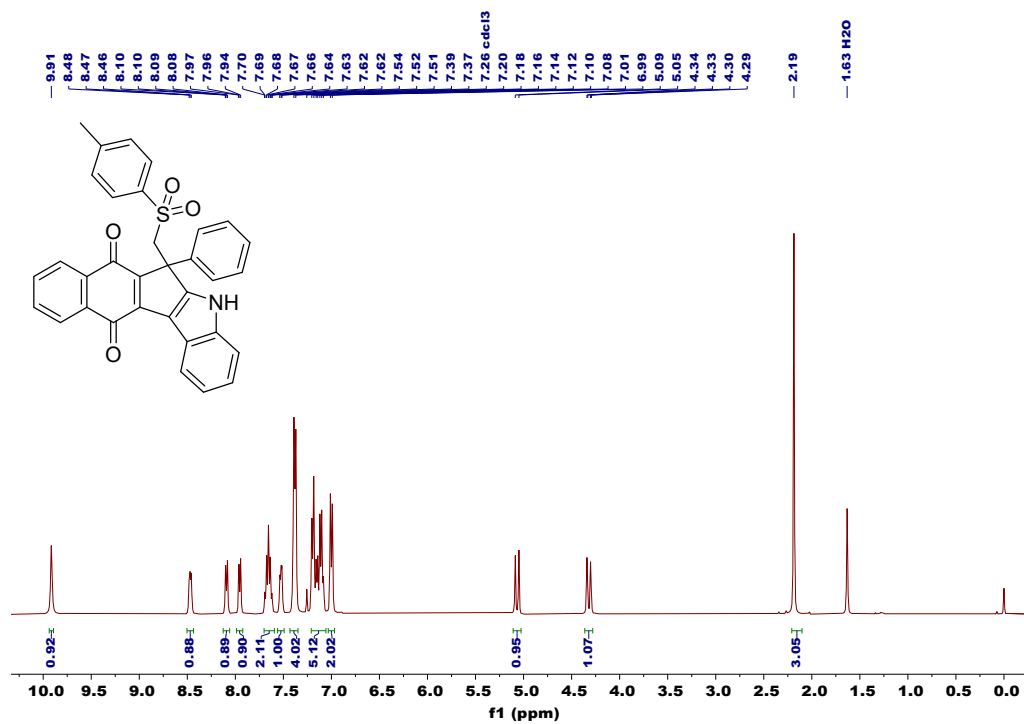

**<sup>13</sup>C {<sup>1</sup>H} NMR (101 MHz)**

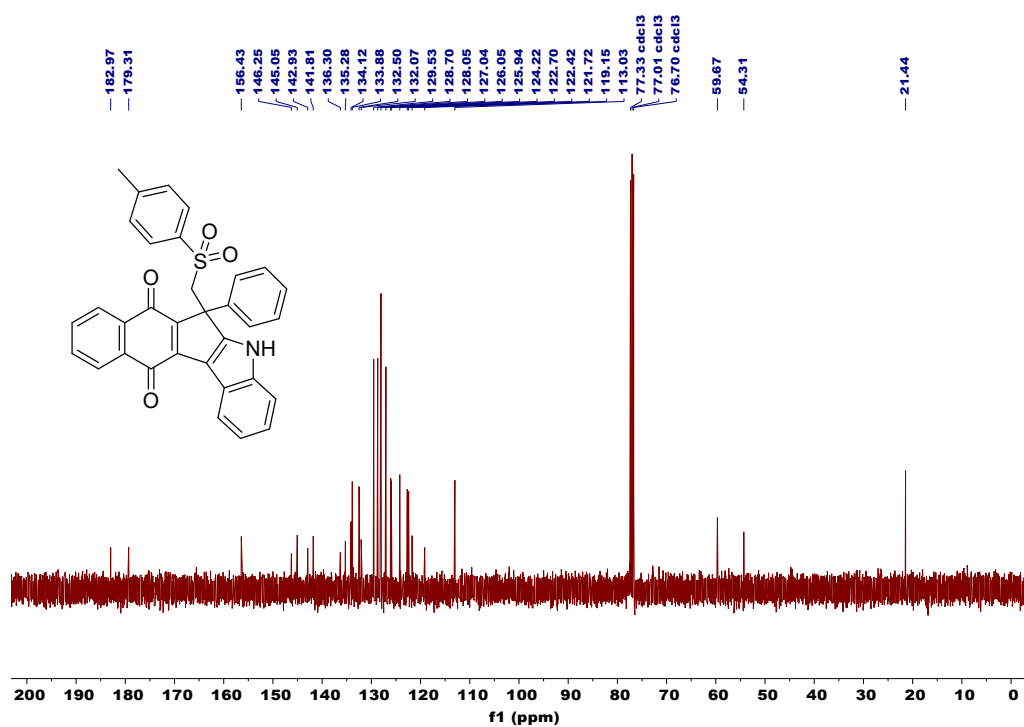

# 5-allyl-6-phenyl-6-(tosylmethyl)-5,6-dihydrobenzo[5,6]indeno[2,1-*b*]indole-7,12-dione (19)

$^1\text{H}$  NMR (400 MHz)

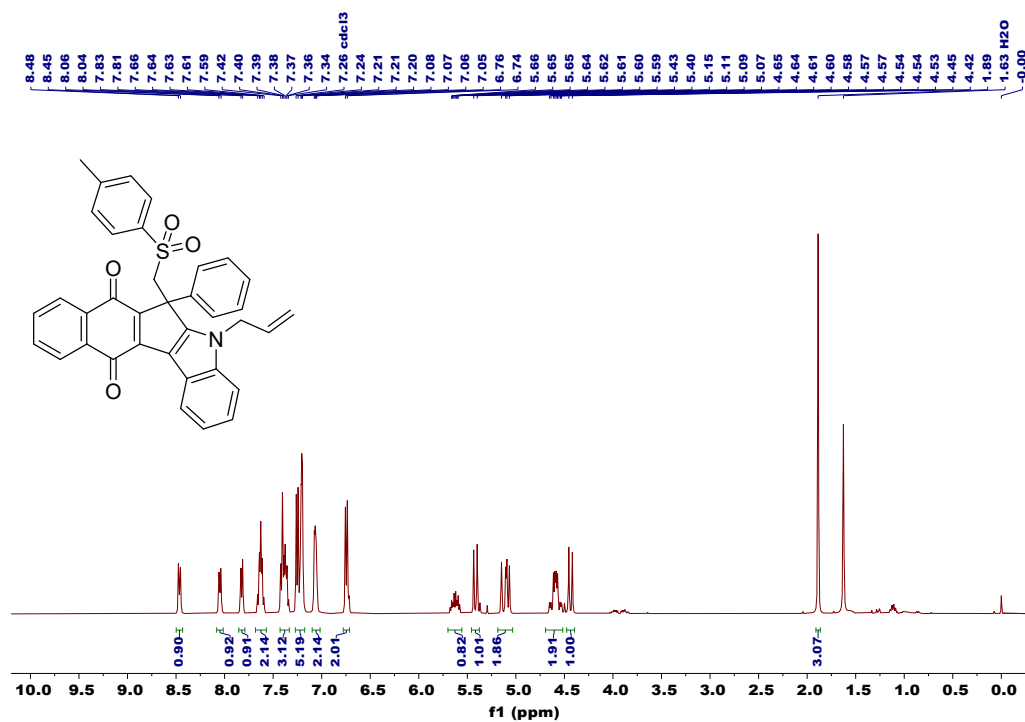

$^{13}\text{C}$  { $^1\text{H}$ } NMR (101 MHz)

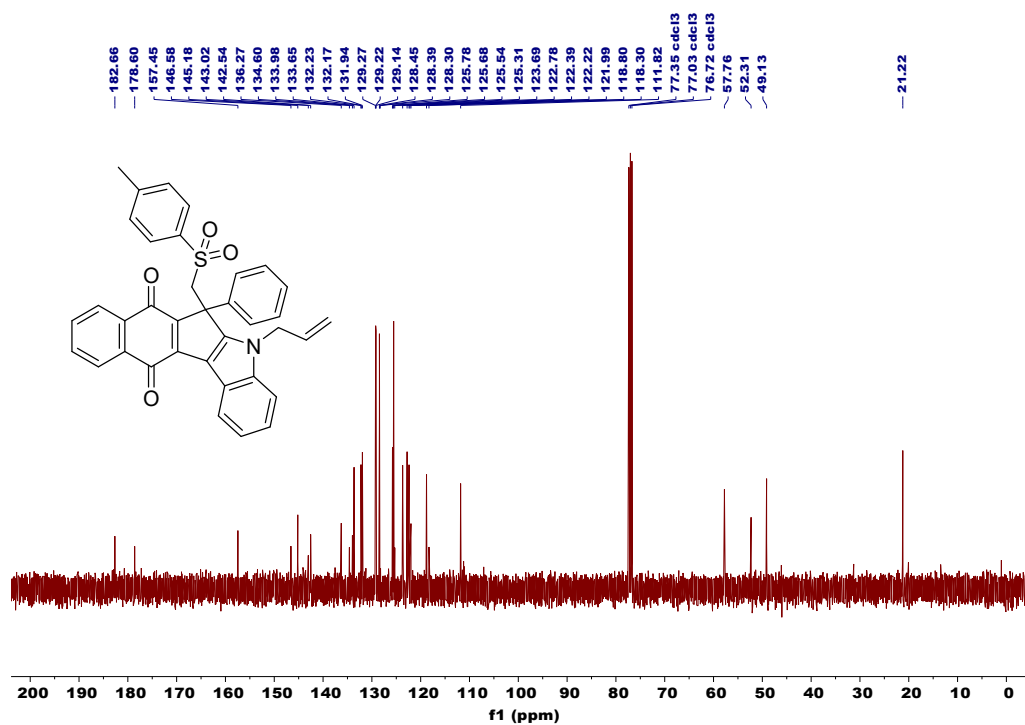

**5-methyl-6-phenethyl-6-(tosylmethyl)-5,6-dihydrobenzo[5,6]indeno[2,1-b]indole-7,12-dione (20)**

**<sup>1</sup>H NMR (400 MHz)**

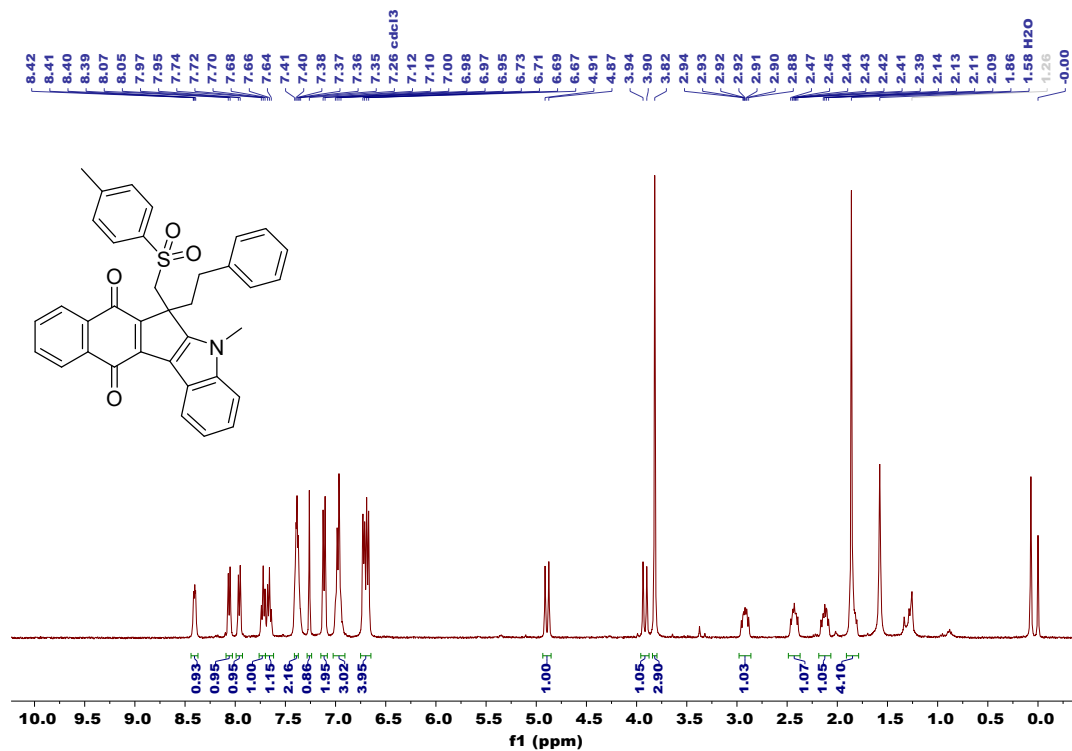

**<sup>13</sup>C {<sup>1</sup>H} NMR (101 MHz)**

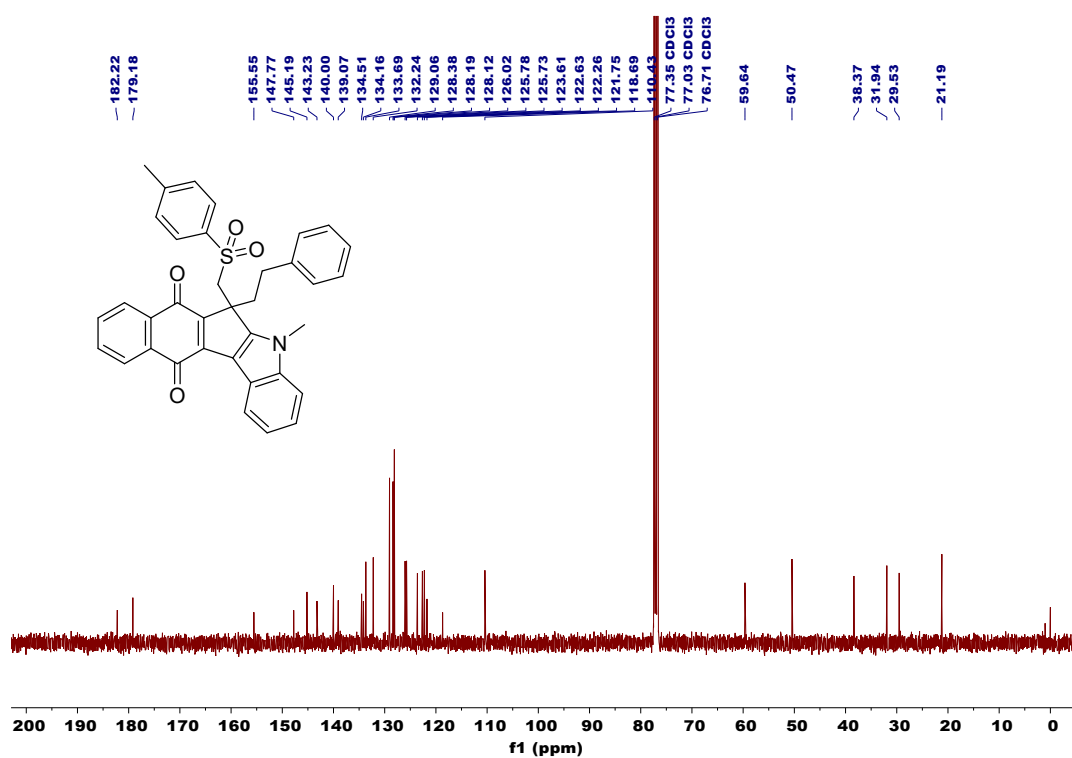

**6-(4-methoxyphenyl)-5-methyl-6-(tosylmethyl)-5,6-dihydrobenzo[5,6]indeno[2,1-b]indole-7,12-dione (21)**

**$^1\text{H}$  NMR (400 MHz)**

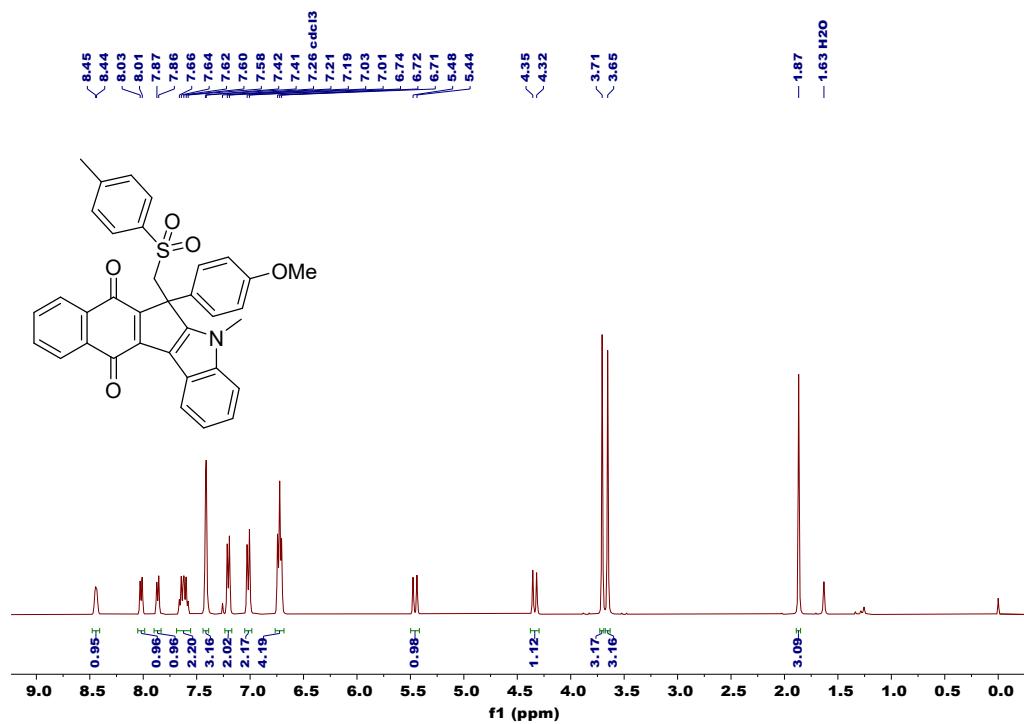

**$^{13}\text{C}$   $\{^1\text{H}\}$  NMR (101 MHz)**

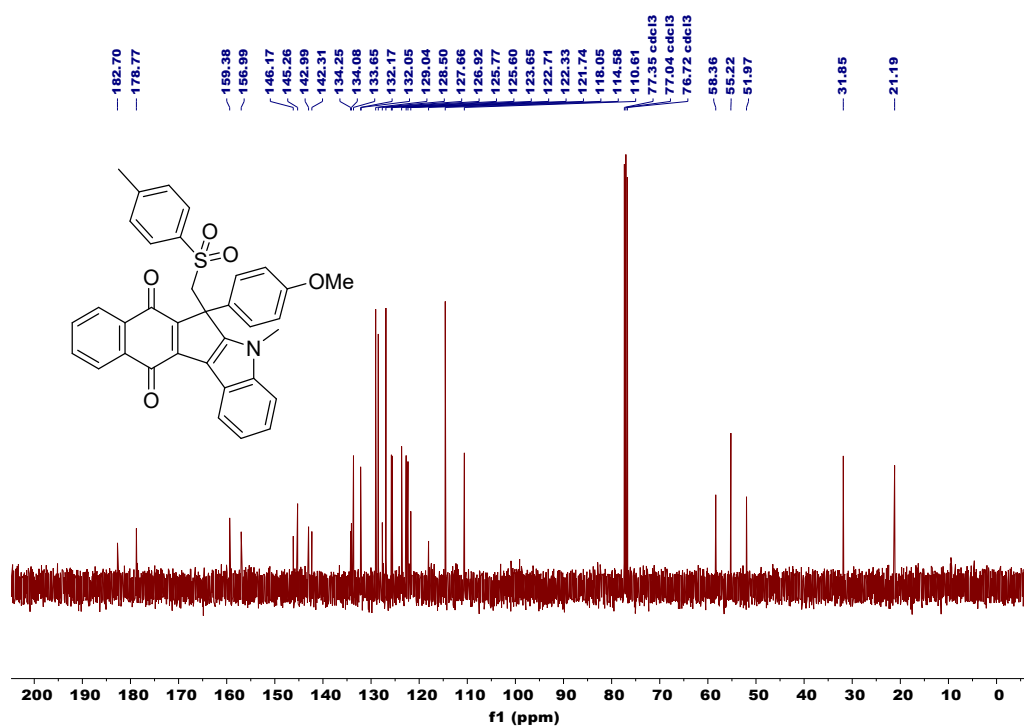

**5-methyl-6-(p-tolyl)-6-(tosylmethyl)-5,6-dihydrobenzo[5,6]indeno[2,1-b]indole-7,12-dione (22)**

**<sup>1</sup>H NMR (400 MHz)**

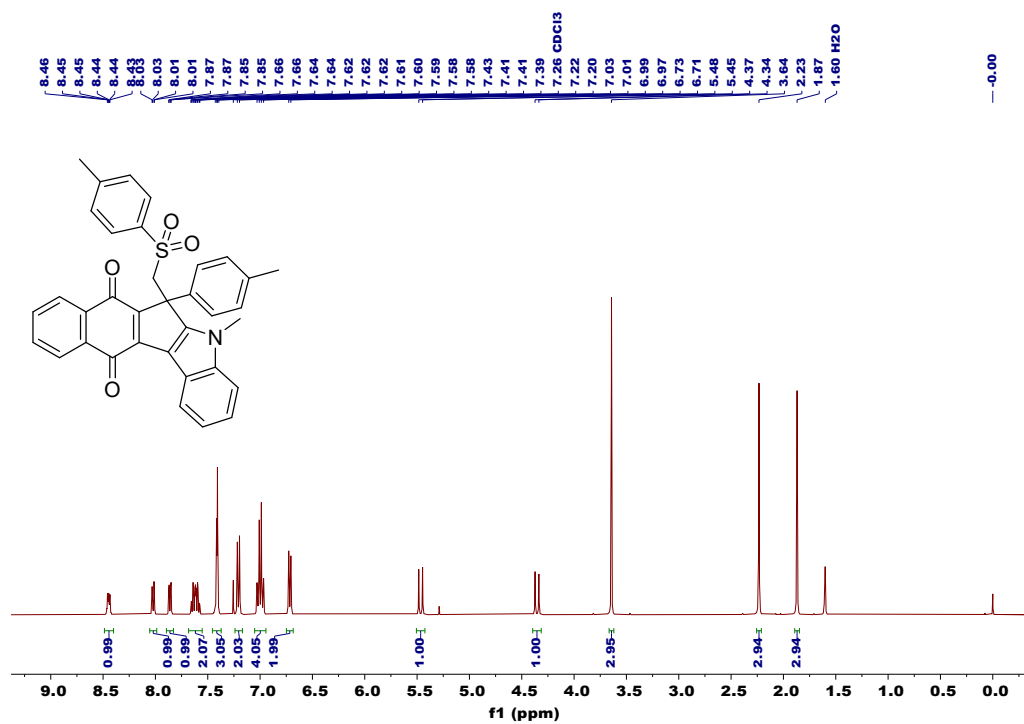

**<sup>13</sup>C {<sup>1</sup>H} NMR (101 MHz)**

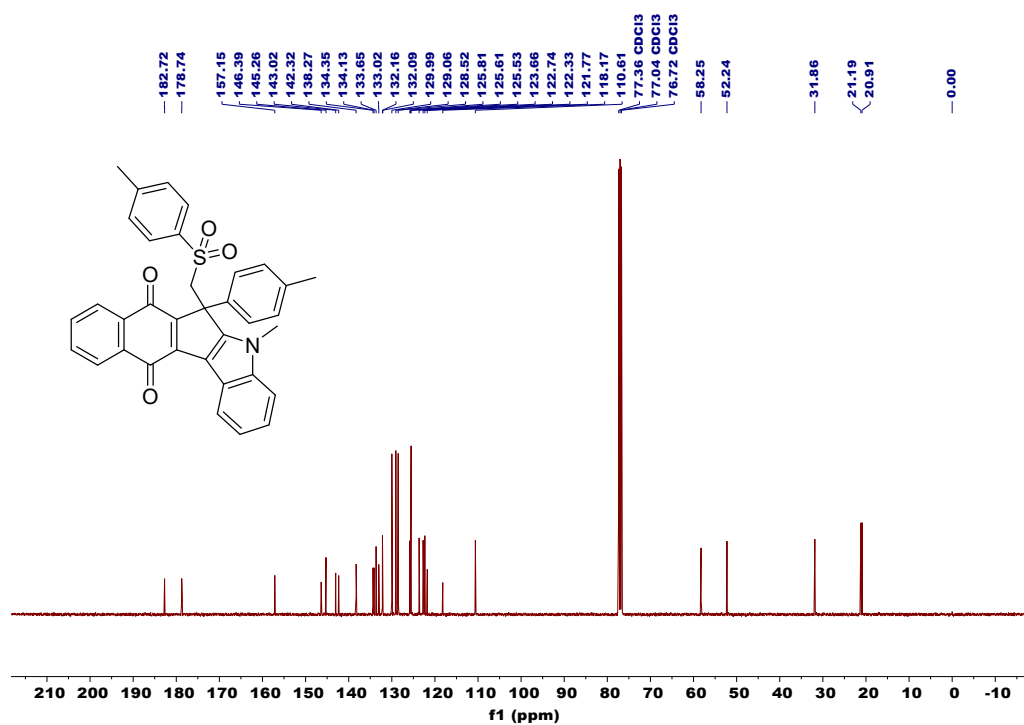



**6-(4-chlorophenyl)-5-methyl-6-(tosylmethyl)-5,6-dihydrobenzo[5,6]indeno[2,1-*b*]indole-7,12-dione (23)**

**<sup>1</sup>H NMR (400 MHz)**

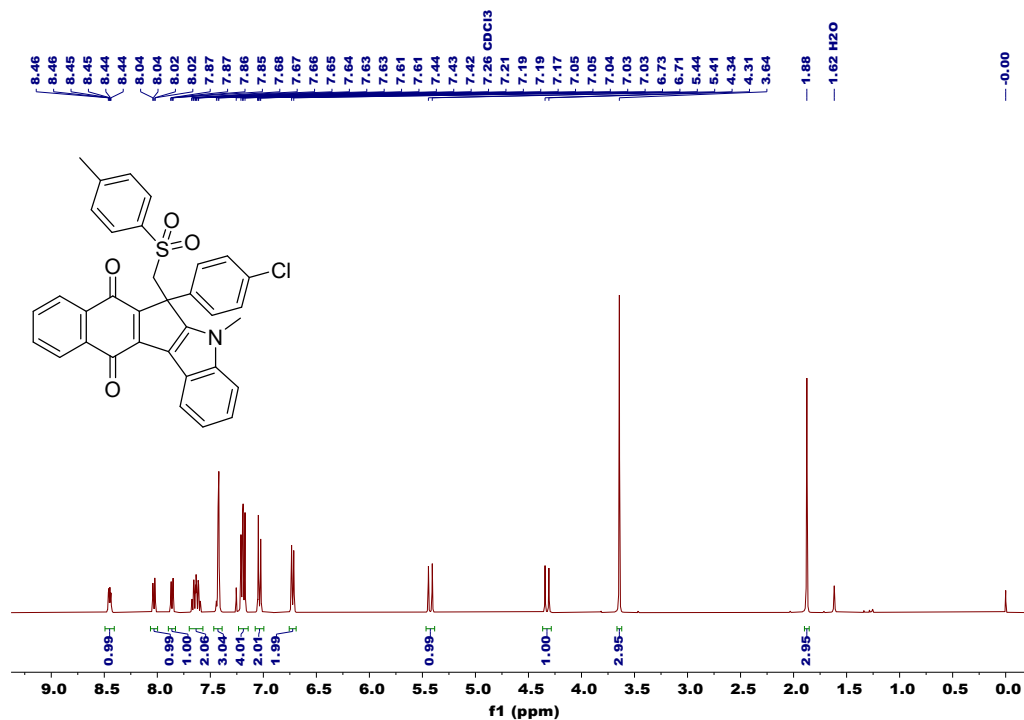

**<sup>13</sup>C {<sup>1</sup>H} NMR (101 MHz)**

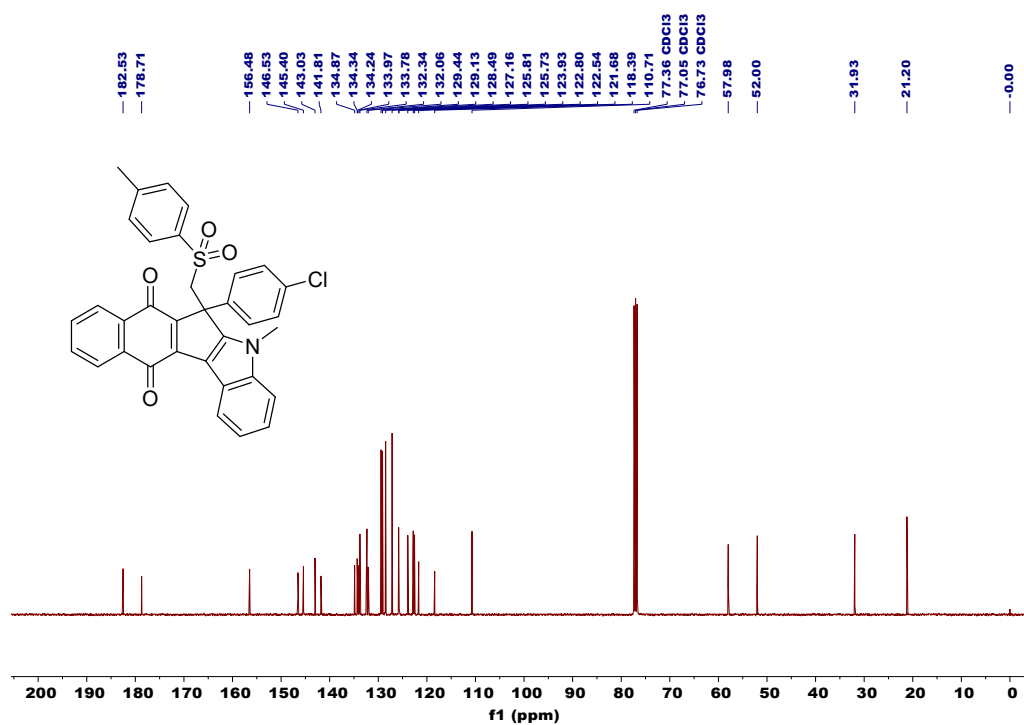

**6-(4-bromophenyl)-5-methyl-6-(tosylmethyl)-5,6-dihydrobenzo[5,6]indeno[2,1-b]indole-7,12-dione (24)**

**<sup>1</sup>H NMR (400 MHz)**

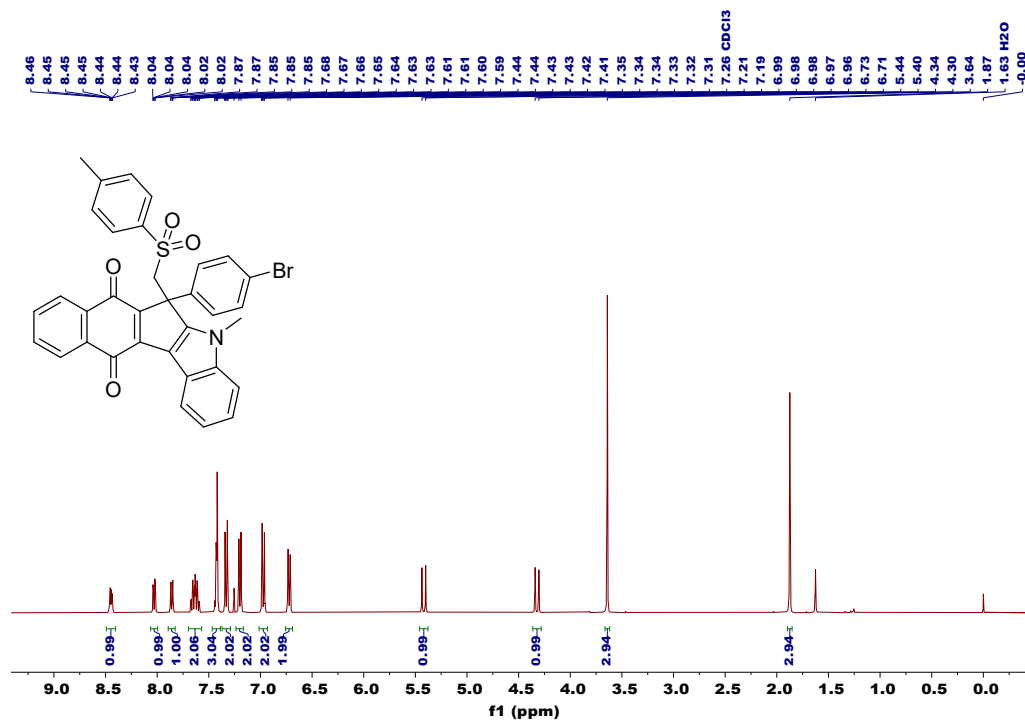

**<sup>13</sup>C {<sup>1</sup>H} NMR (101 MHz)**

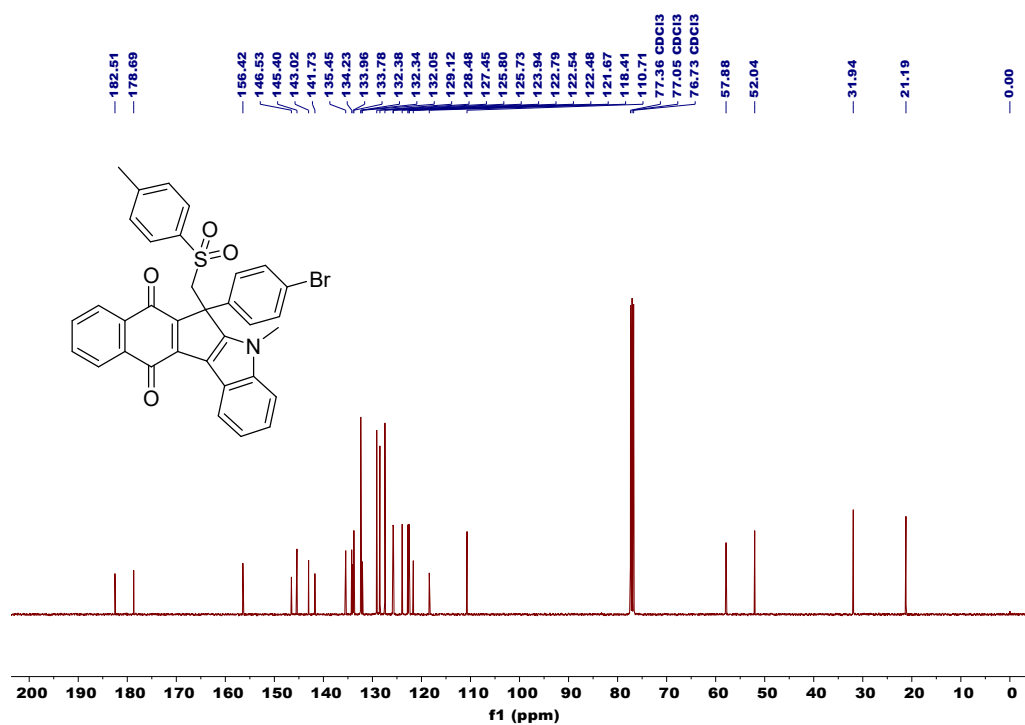

**5-methyl-6-(m-tolyl)-6-(tosylmethyl)-5,6-dihydrobenzo[5,6]indeno[2,1-b]indole-7,12-dione (25)**

**<sup>1</sup>H NMR (400 MHz)**

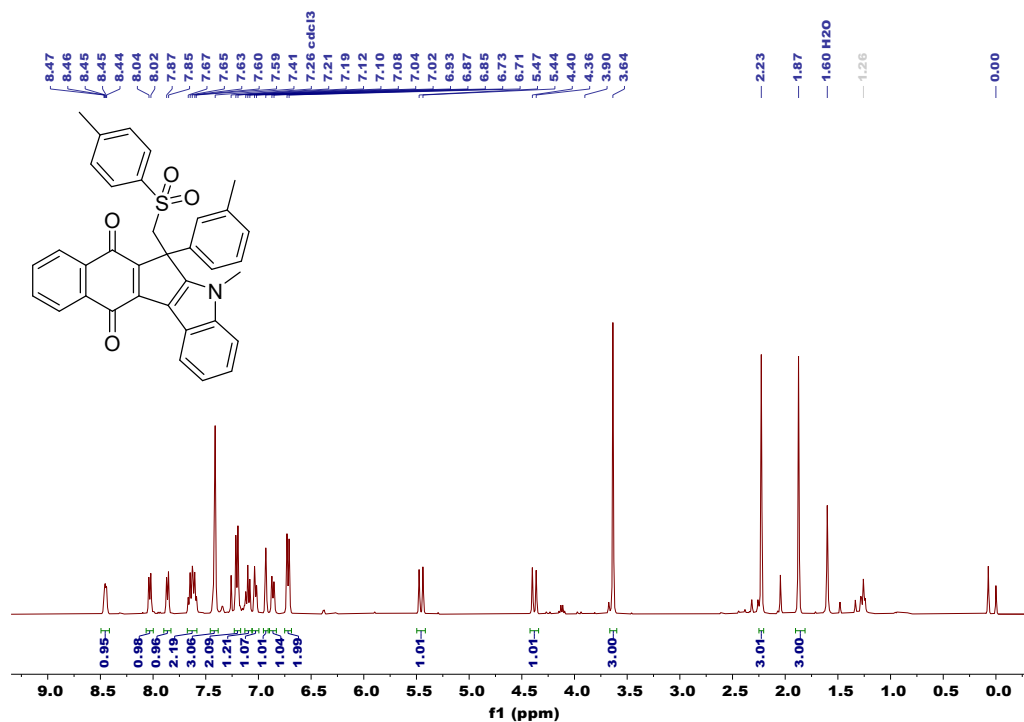

**<sup>13</sup>C {<sup>1</sup>H} NMR (101 MHz)**

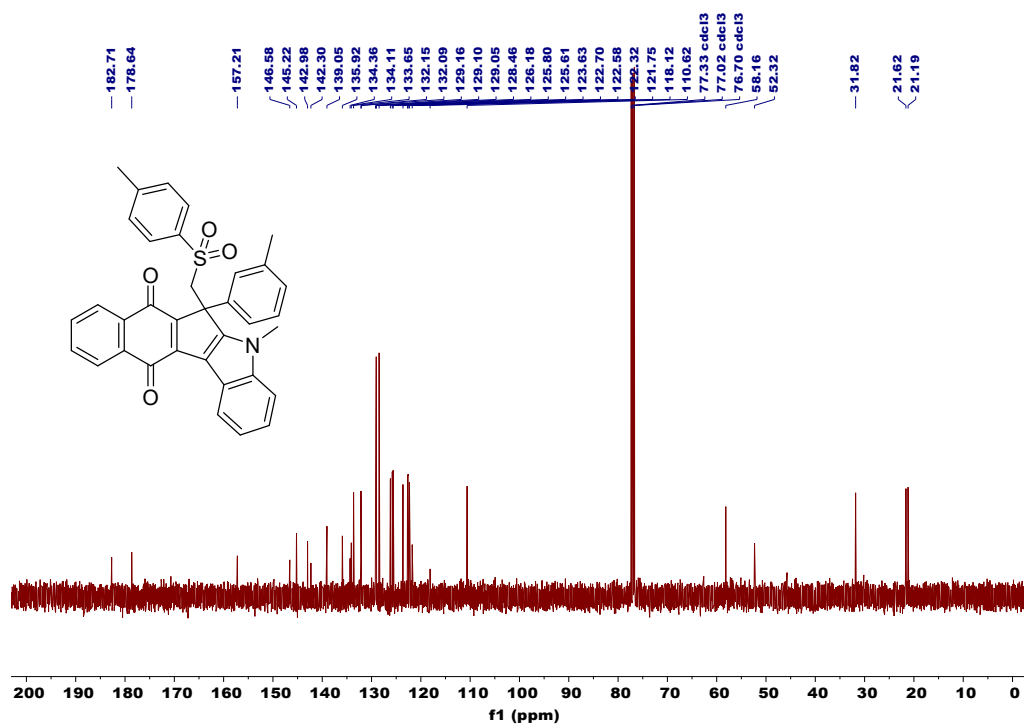

**5-methyl-6-(*o*-tolyl)-6-(tosylmethyl)-5,6-dihydrobenzo[5,6]indeno[2,1-*b*]indole-7,12-dione (26)**

**$^1\text{H}$  NMR (400 MHz)**

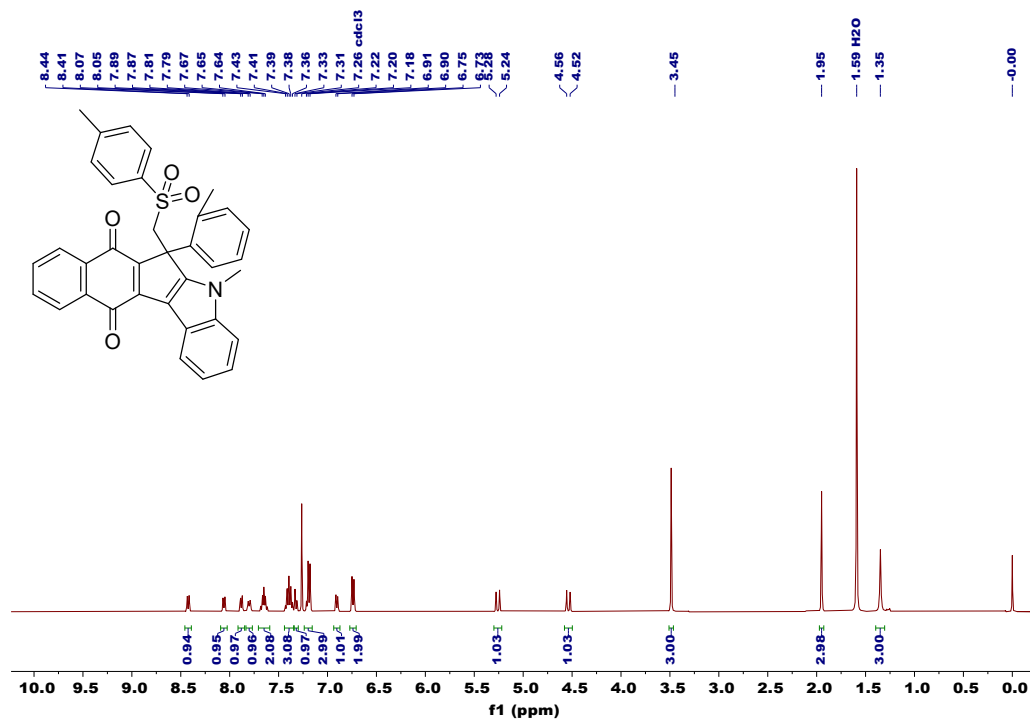

**$^{13}\text{C}$  { $^1\text{H}$ } NMR (101 MHz)**

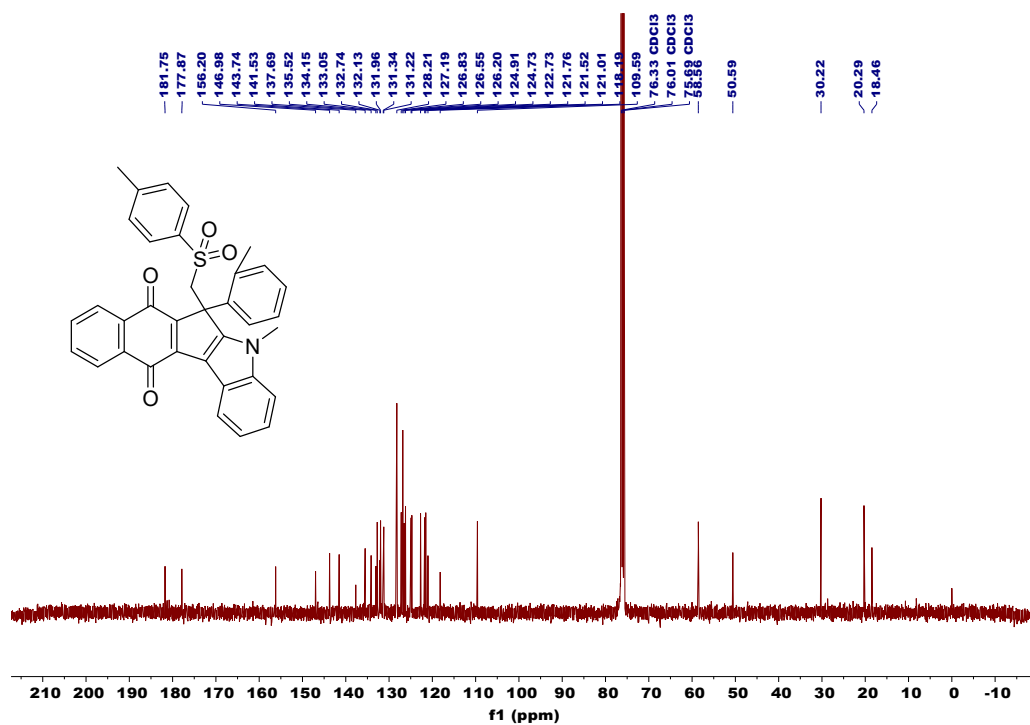

**5-methyl-6-(thiophen-2-yl)-6-(tosylmethyl)-5,6-dihydrobenzo[5,6]indeno[2,1-b]indole-7,12-dione (27)**

**<sup>1</sup>H NMR (400 MHz)**

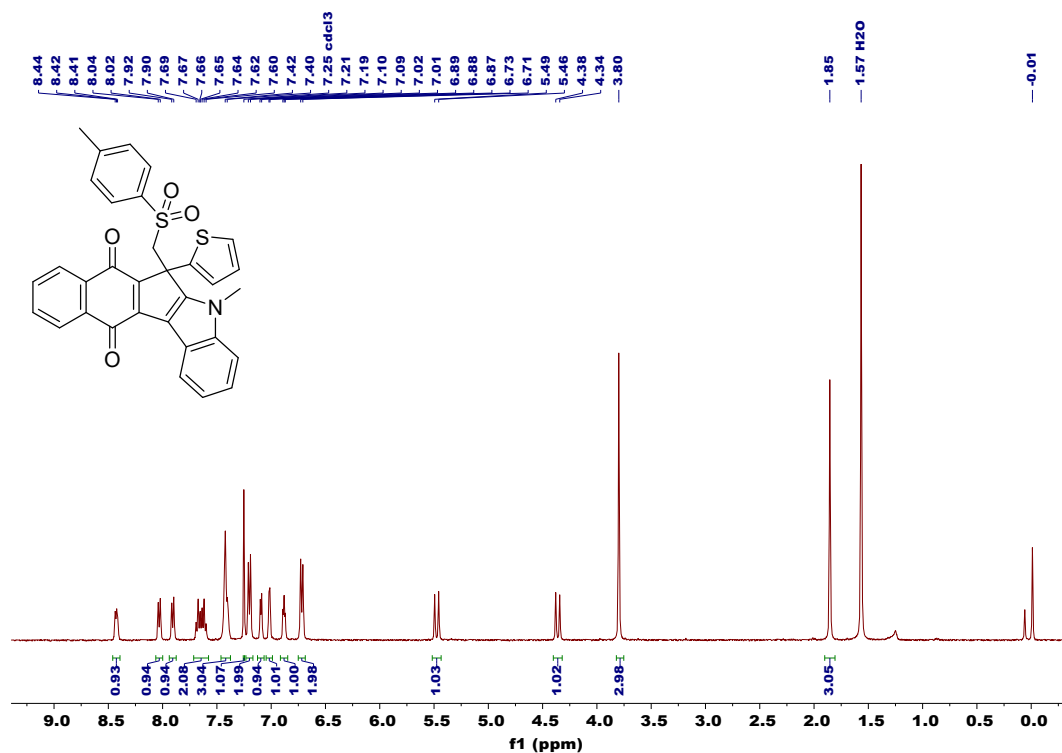

**<sup>13</sup>C {<sup>1</sup>H} NMR (101 MHz)**

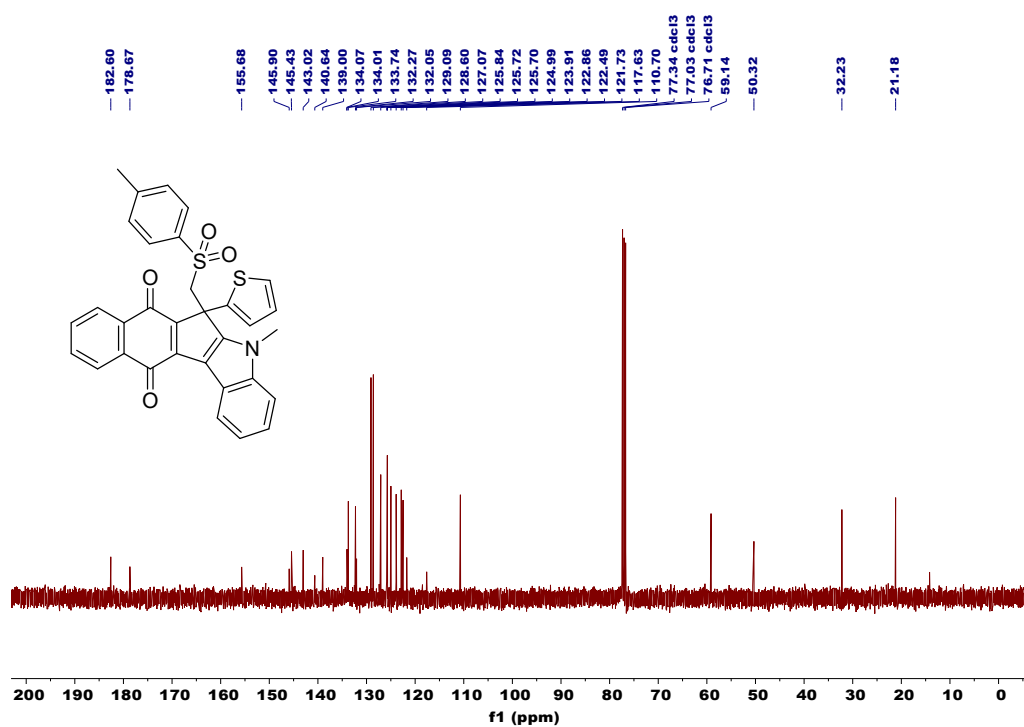

**6-((cyclopropylsulfonyl)methyl)-5-methyl-6-phenyl-5,6-dihydrobenzo[5,6]indeno[2,1-b]indole-7,12-dione (28)**

**<sup>1</sup>H NMR (400 MHz)**

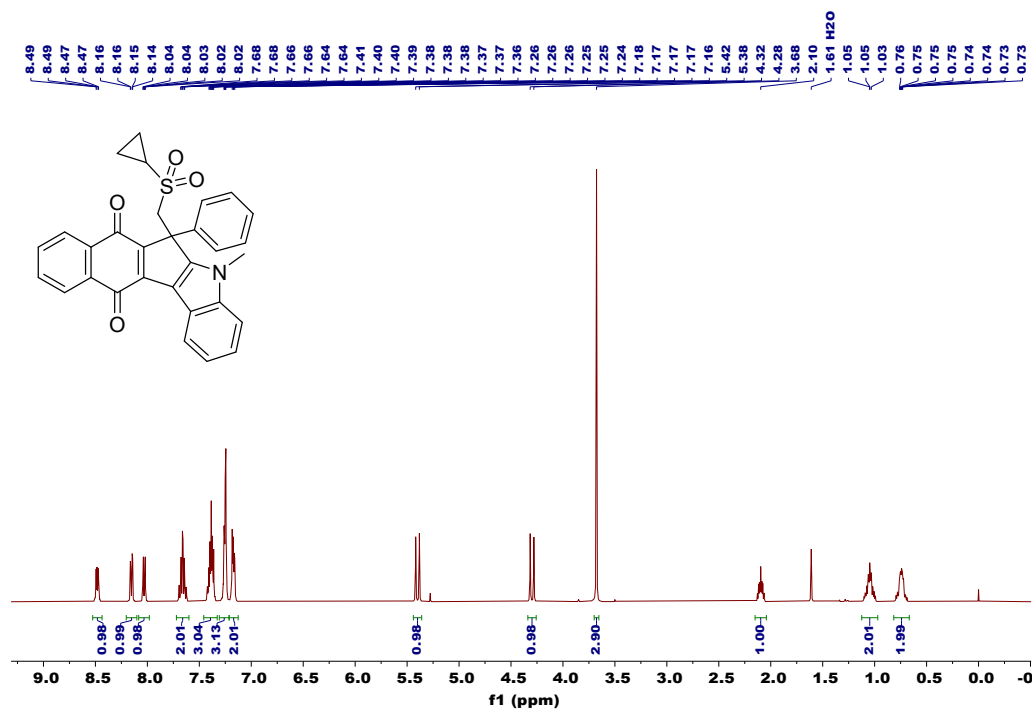

**<sup>13</sup>C {<sup>1</sup>H} NMR (101 MHz)**

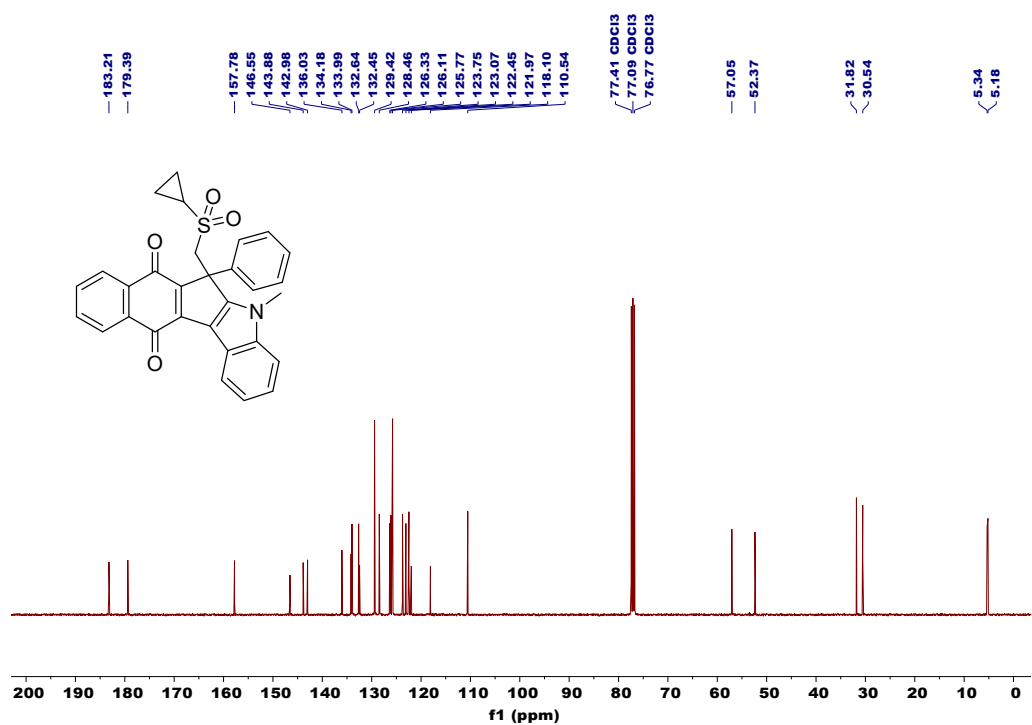

**5-methyl-6-((octylsulfonyl)methyl)-6-phenyl-5,6-dihydrobenzo[5,6]indeno[2,1-*b*]indole-7,12-dione (29)**

**<sup>1</sup>H NMR (400 MHz)**

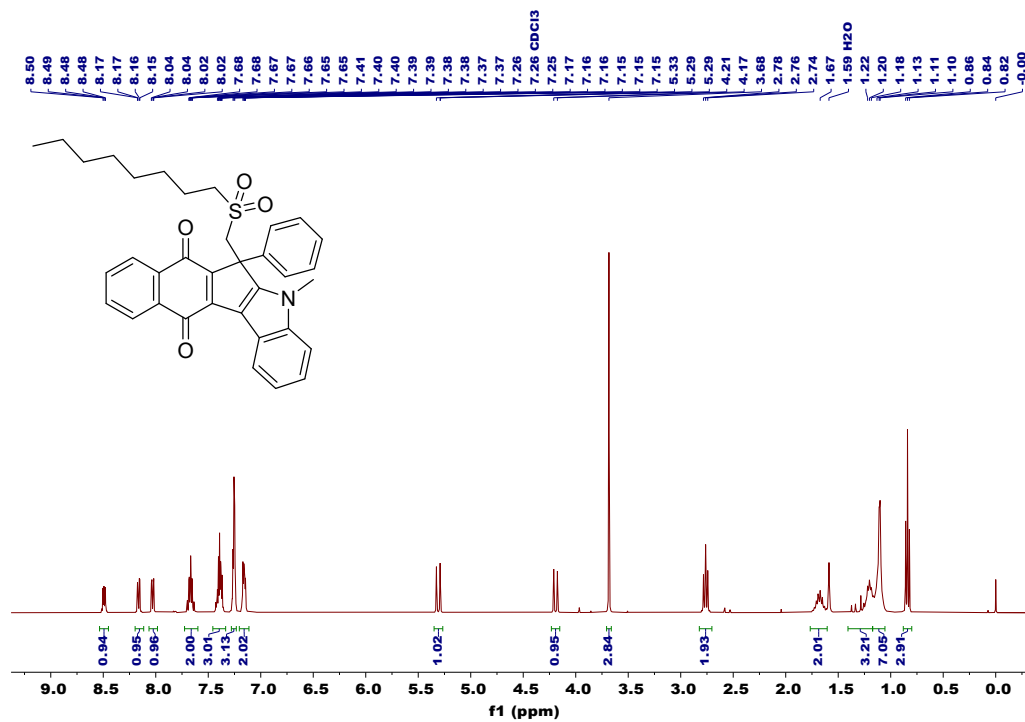

**<sup>13</sup>C {<sup>1</sup>H} NMR (101 MHz)**

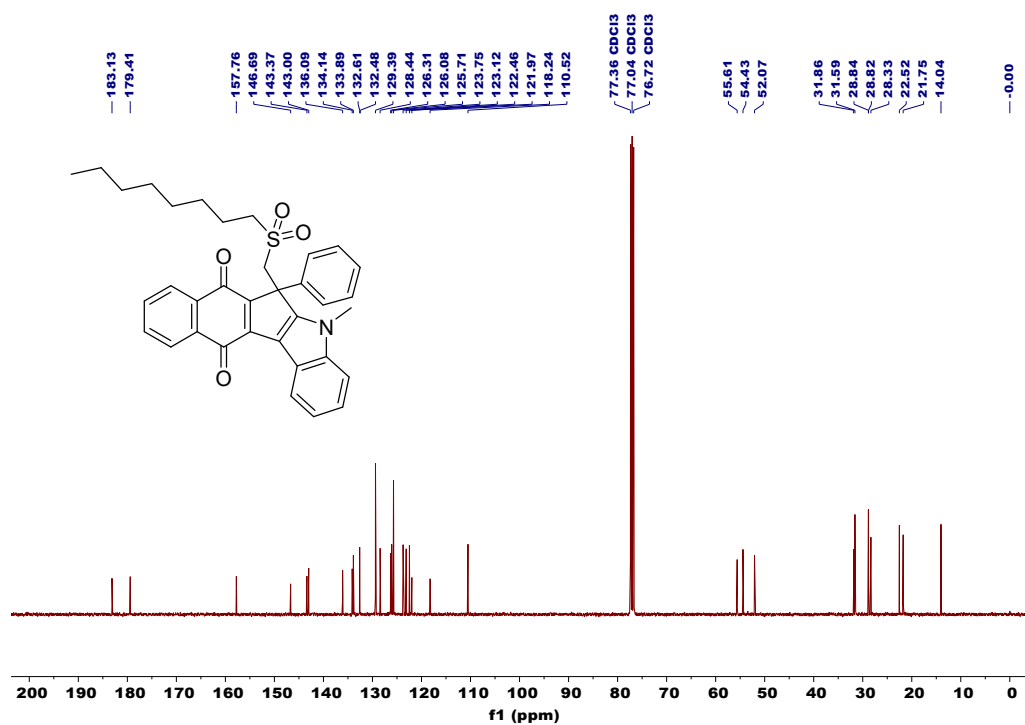

**6-(((4-methoxyphenyl)sulfonyl)methyl)-5-methyl-6-phenyl-5,6-dihydrobenzo[5,6]indeno[2,1-b]indole-7,12-dione (30)**

**<sup>1</sup>H NMR (400 MHz)**

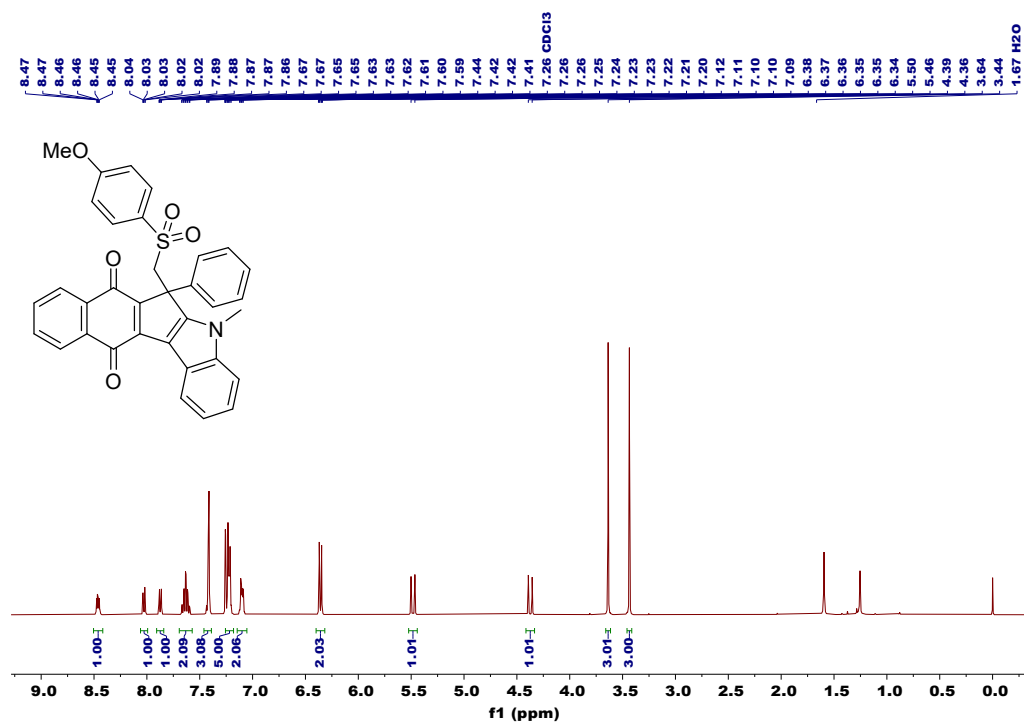

**<sup>13</sup>C {<sup>1</sup>H} NMR (101 MHz)**

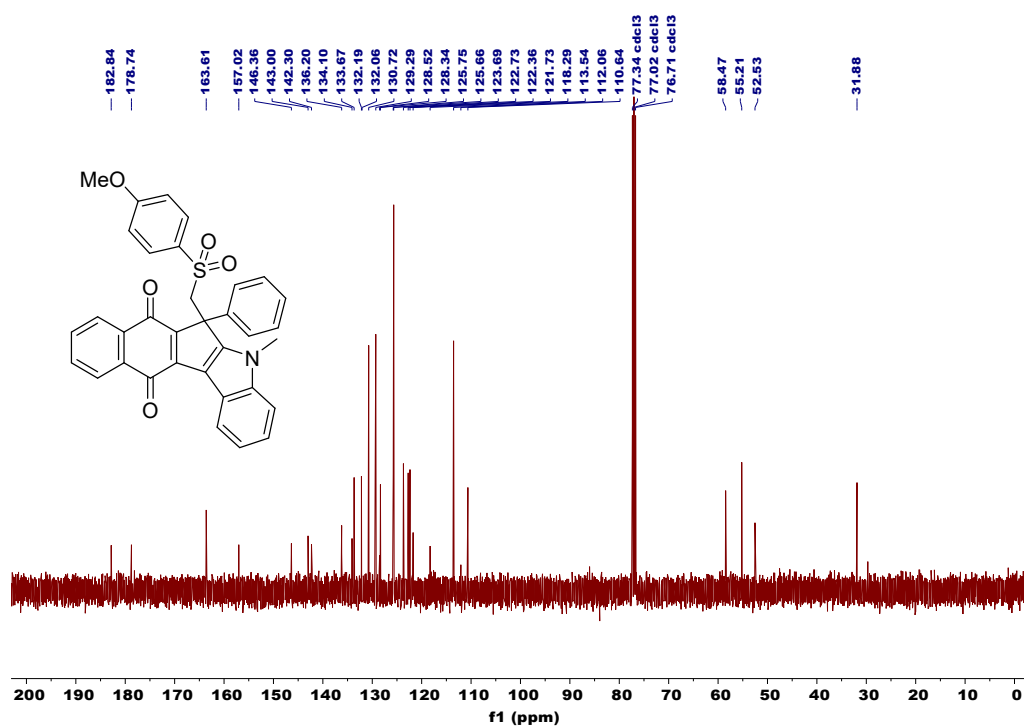



**5-methyl-6-phenyl-6-((phenylsulfonyl)methyl)-5,6-dihydrobenzo[5,6]indeno[2,1-b]indole-7,12-dione (31)**

**<sup>1</sup>H NMR (400 MHz)**

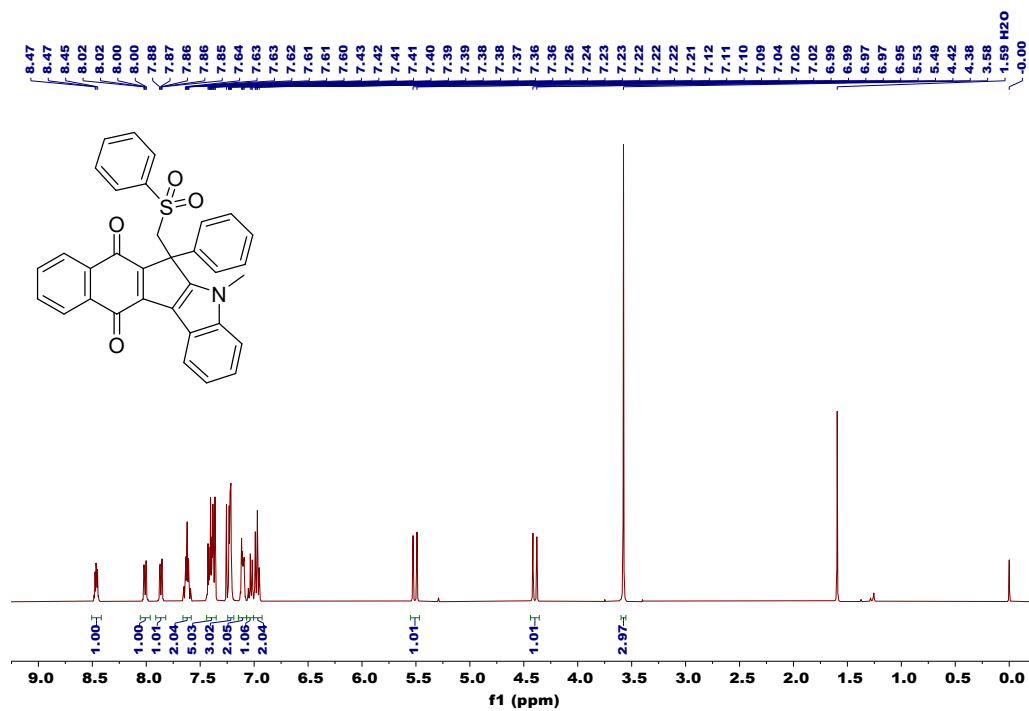

**<sup>13</sup>C {<sup>1</sup>H} NMR (101 MHz)**

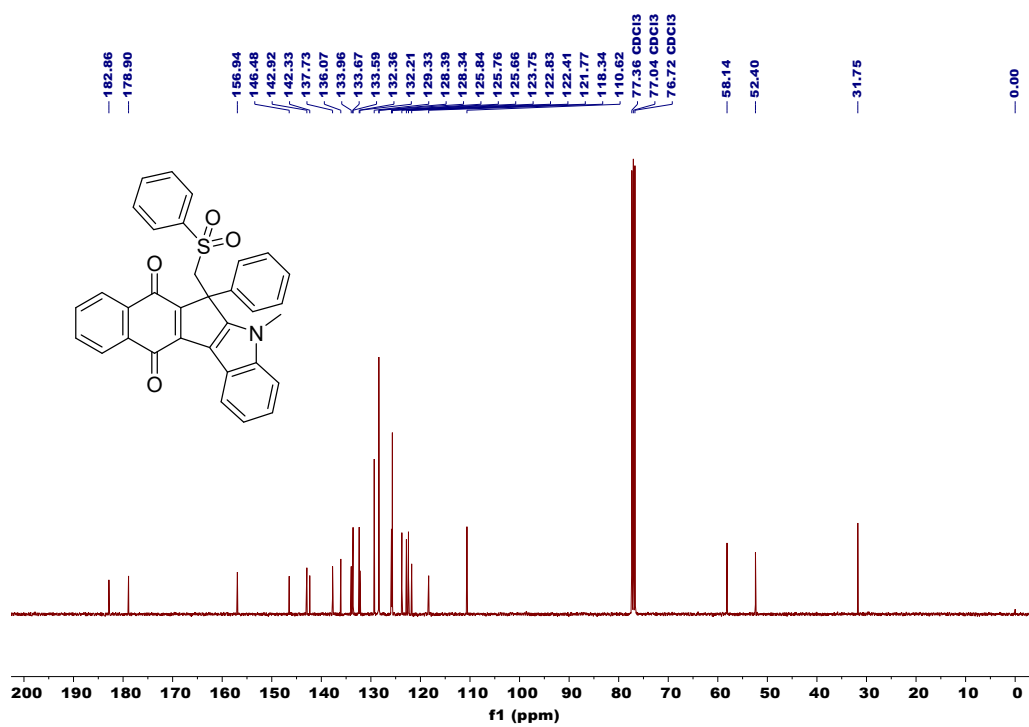

**6-(((4-fluorophenyl)sulfonyl)methyl)-5-methyl-6-phenyl-5,6-dihydrobenzo[5,6]indeno[2,1-b]indole-7,12-dione (32)**

**<sup>1</sup>H NMR (400 MHz)**

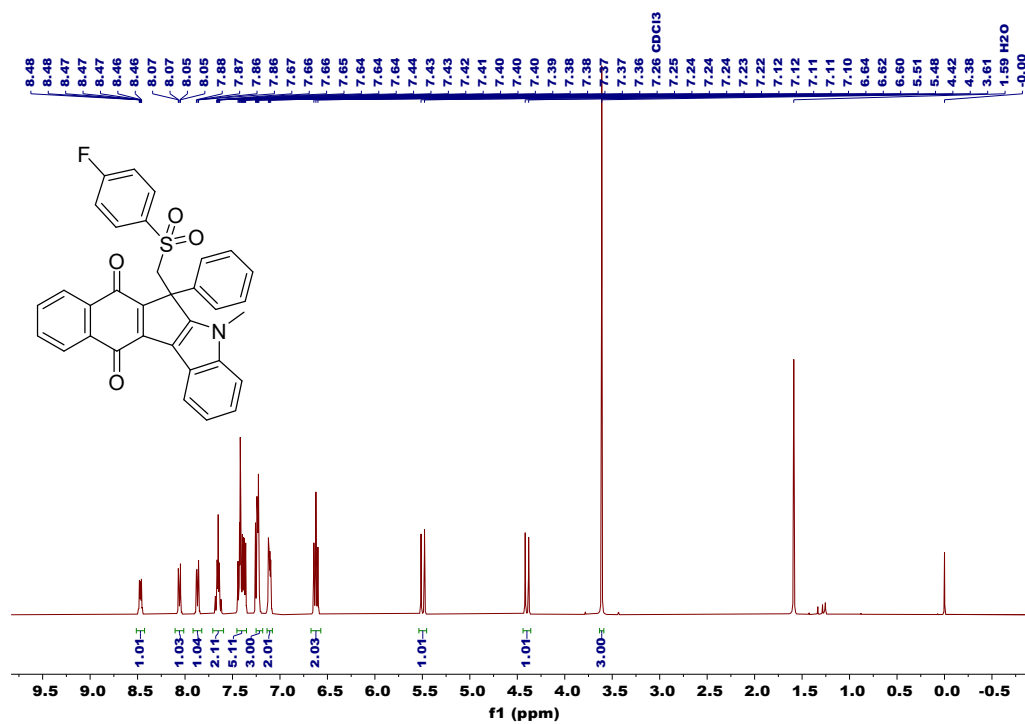

**<sup>13</sup>C {<sup>1</sup>H} NMR (101 MHz)**

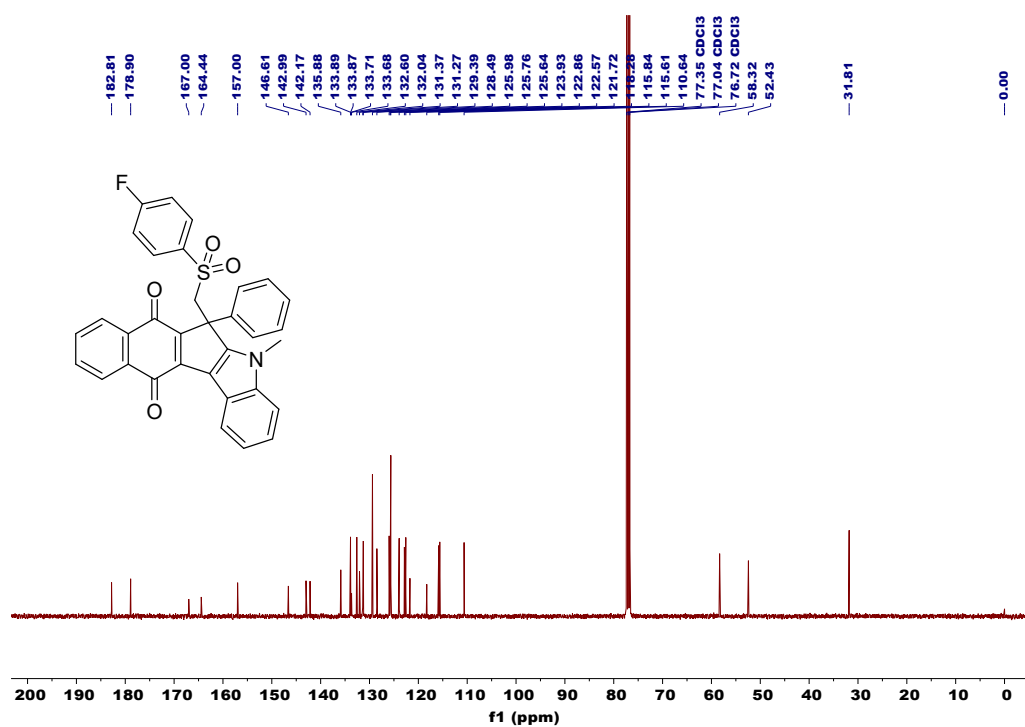

**$^{19}\text{F}$  { $^1\text{H}$ } NMR (376 MHz)**

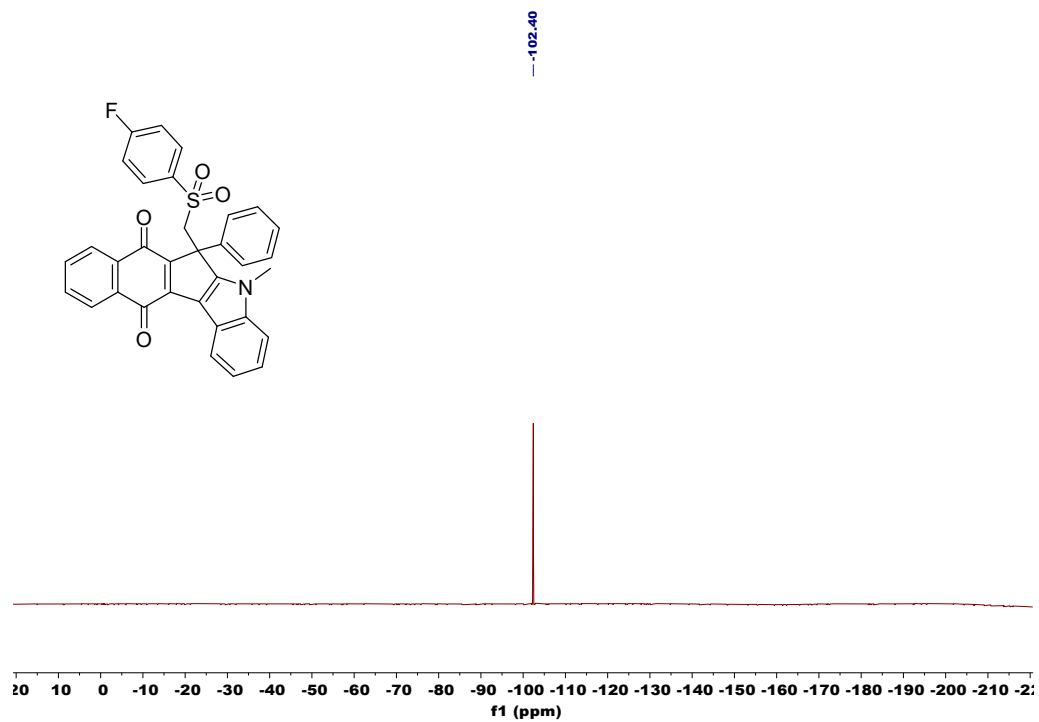

**6-(((4-chlorophenyl)sulfonyl)methyl)-5-methyl-6-phenyl-5,6-dihydrobenzo[5,6]indeno[2,1-b]indole-7,12-dione (33)**

**<sup>1</sup>H NMR (400 MHz)**

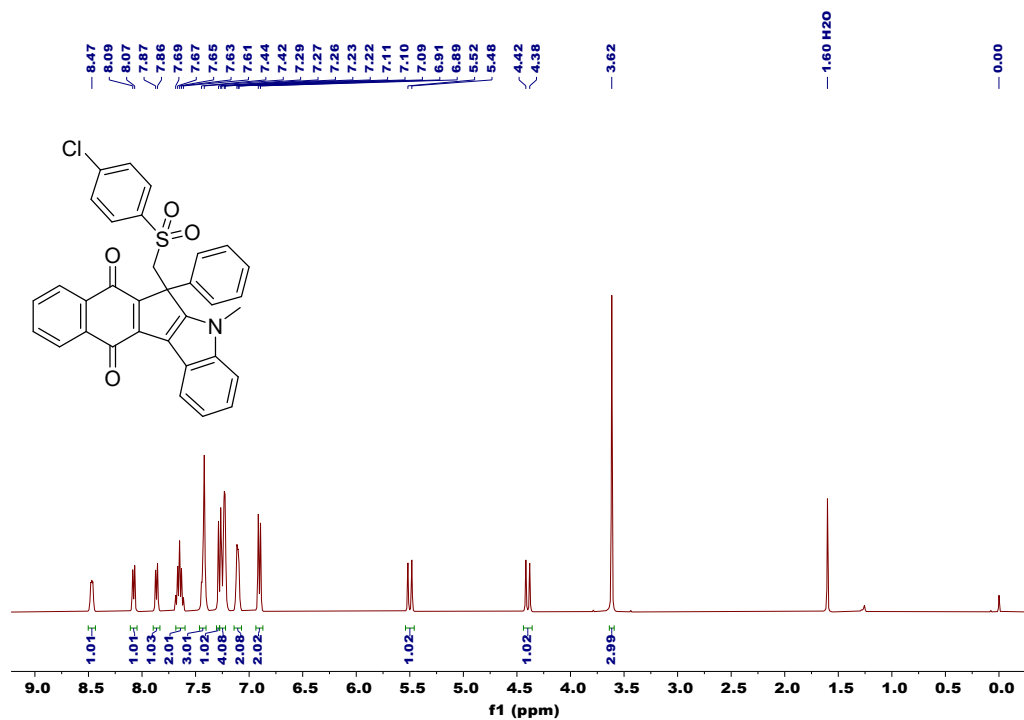

**<sup>13</sup>C {<sup>1</sup>H} NMR (101 MHz)**

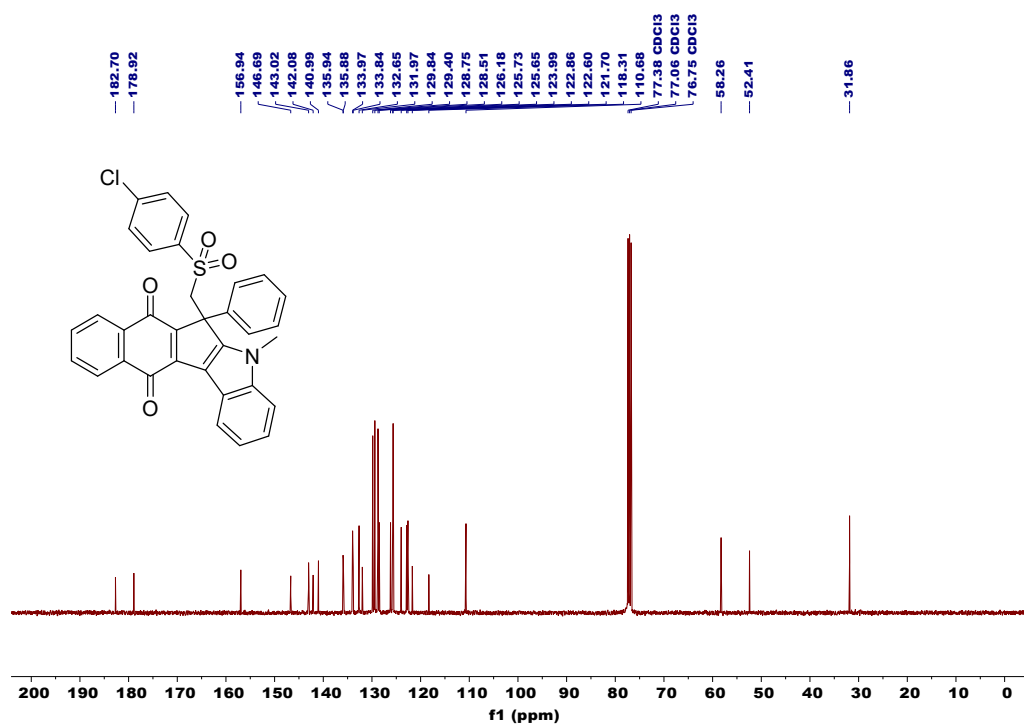

6-(((4-bromophenyl)sulfonyl)methyl)-5-methyl-6-phenyl-5,6-dihydrobenzo[5,6]indeno[2,1-b]indole-7,12-dione (34)

$^1\text{H}$  NMR (400 MHz)

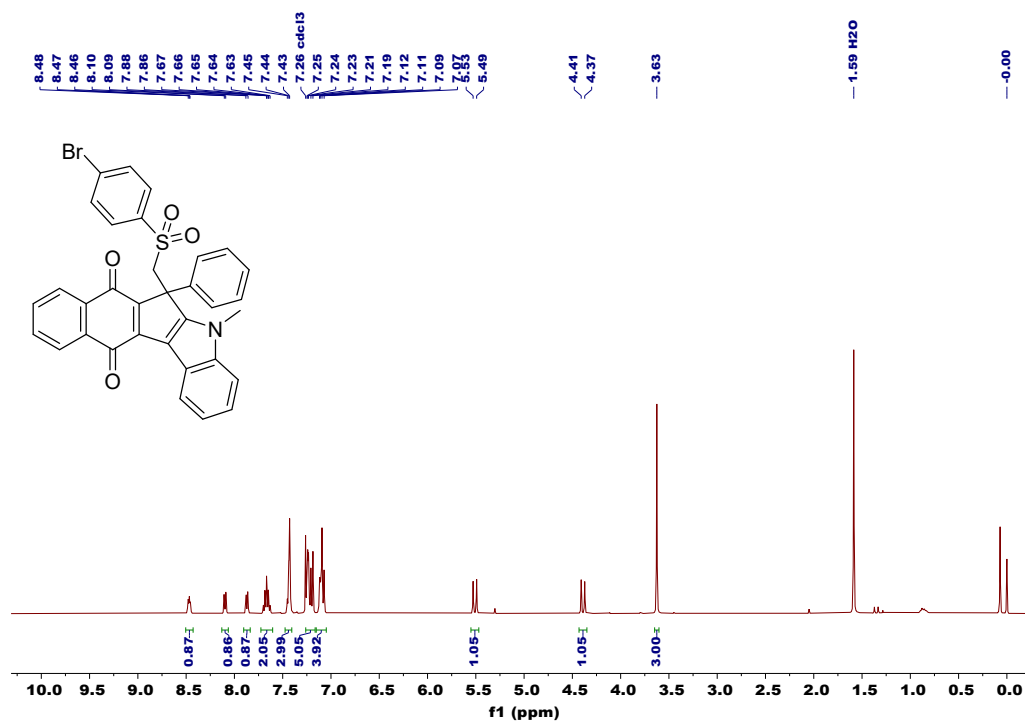

$^{13}\text{C}$  { $^1\text{H}$ } NMR (101 MHz)

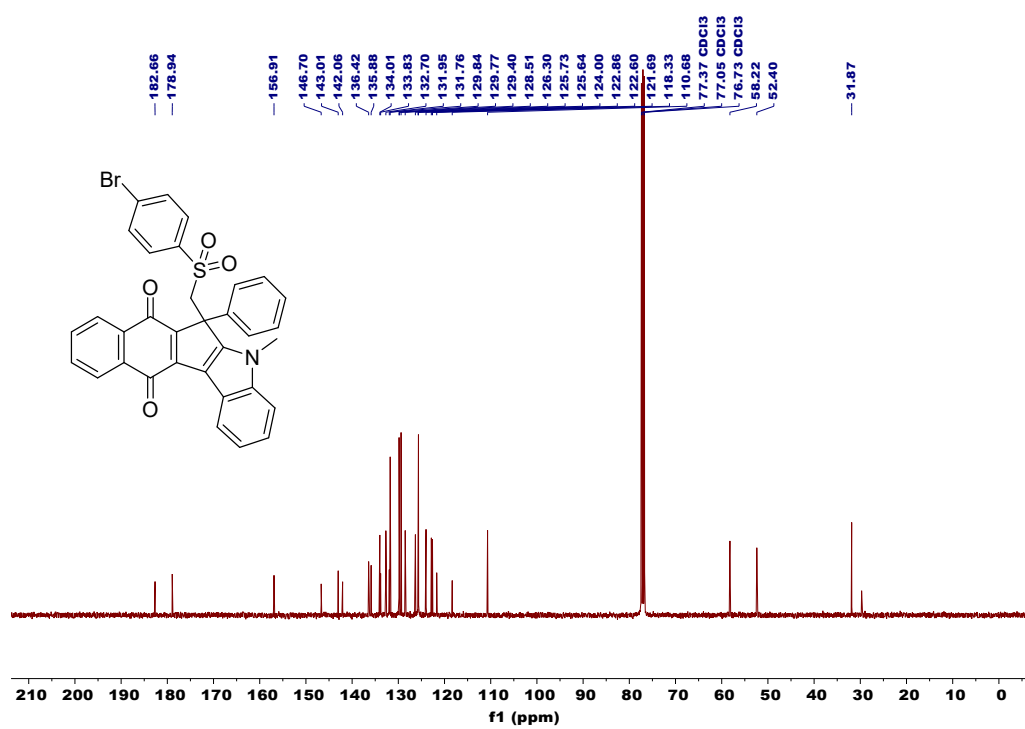

**5-methyl-6-phenyl-6-((*m*-tolylsulfonyl)methyl)-5,6-dihydrobenzo[5,6]indeno[2,1-*b*]indole-7,12-dione (35)**

**<sup>1</sup>H NMR (400 MHz)**

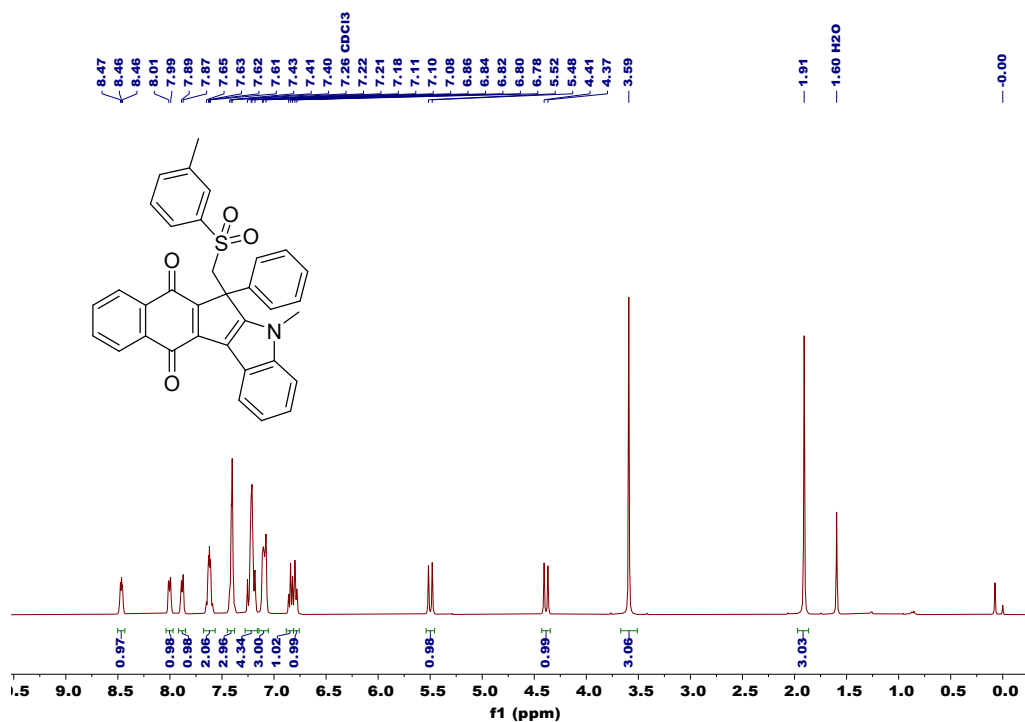

**<sup>13</sup>C {<sup>1</sup>H} NMR (101 MHz)**

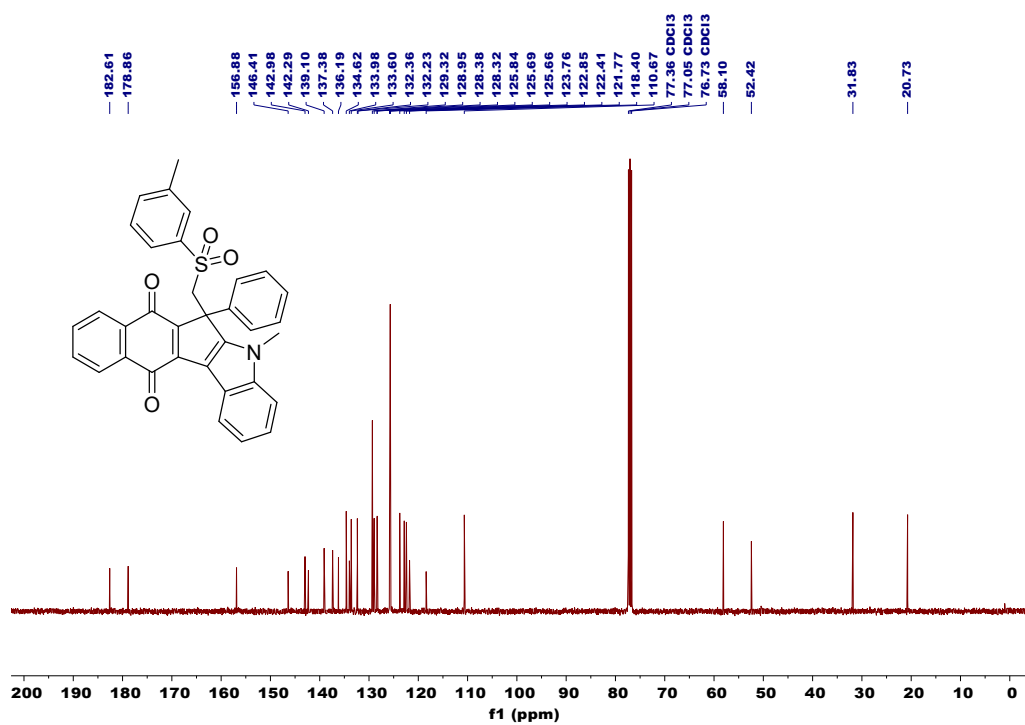

**5-methyl-6-phenyl-6-((*o*-tolylsulfonyl)methyl)-5,6-dihydrobenzo[5,6]indeno[2,1-*b*]indole-7,12-dione (36)**

**<sup>1</sup>H NMR (400 MHz)**

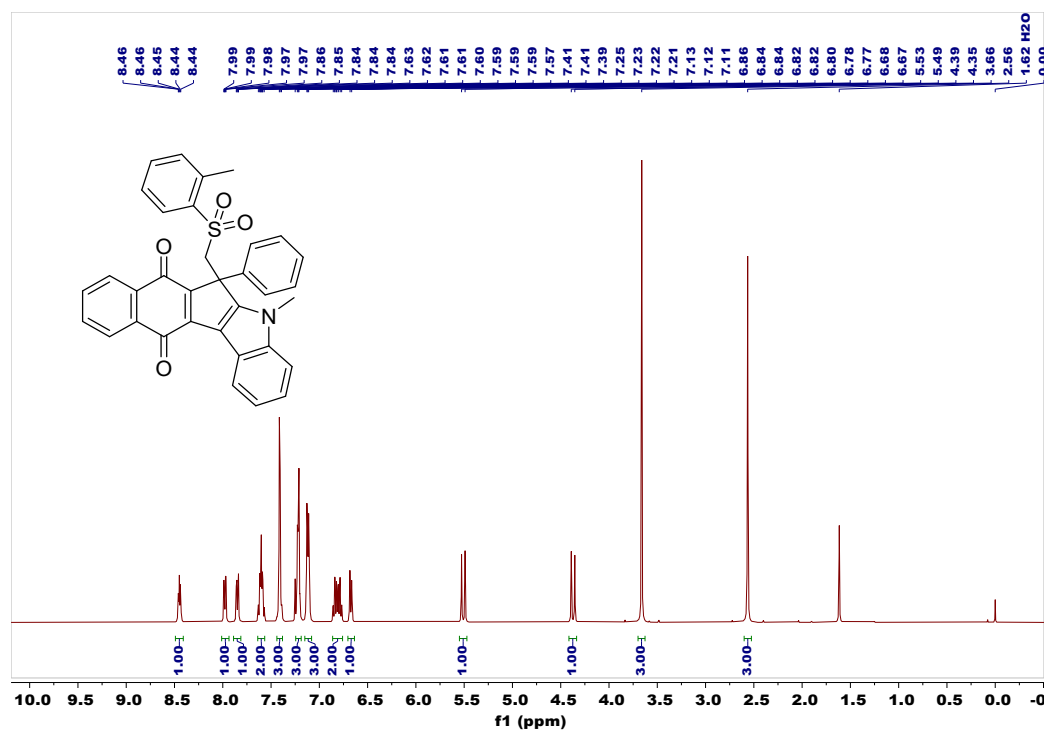

**<sup>13</sup>C {<sup>1</sup>H} NMR (101 MHz)**

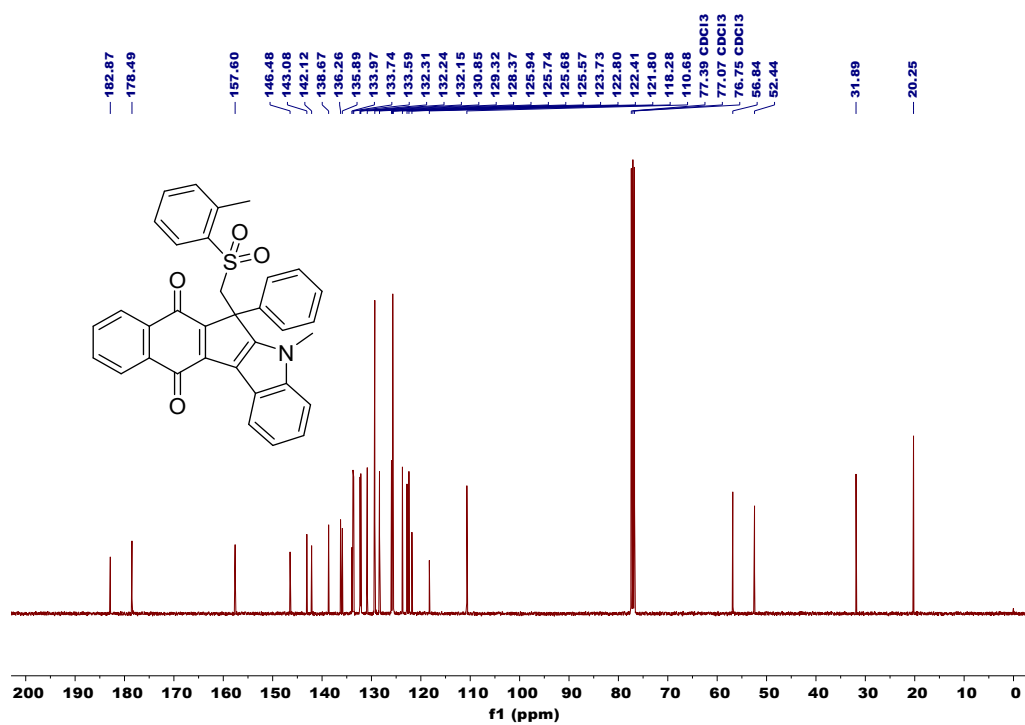

5-methyl-6-((naphthalen-1-ylsulfonyl)methyl)-6-phenyl-5,6-dihydrobenzo[5,6]indeno[2,1-b]indole-7,12-dione (37)

$^1\text{H}$  NMR (400 MHz)

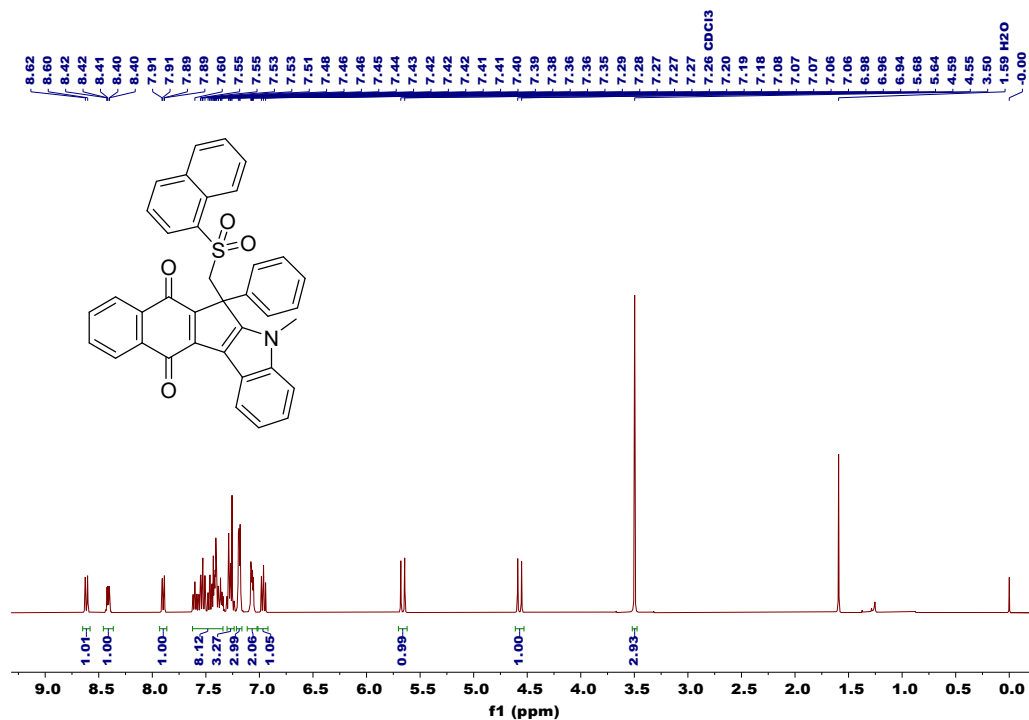

$^{13}\text{C}$  { $^1\text{H}$ } NMR (101 MHz)

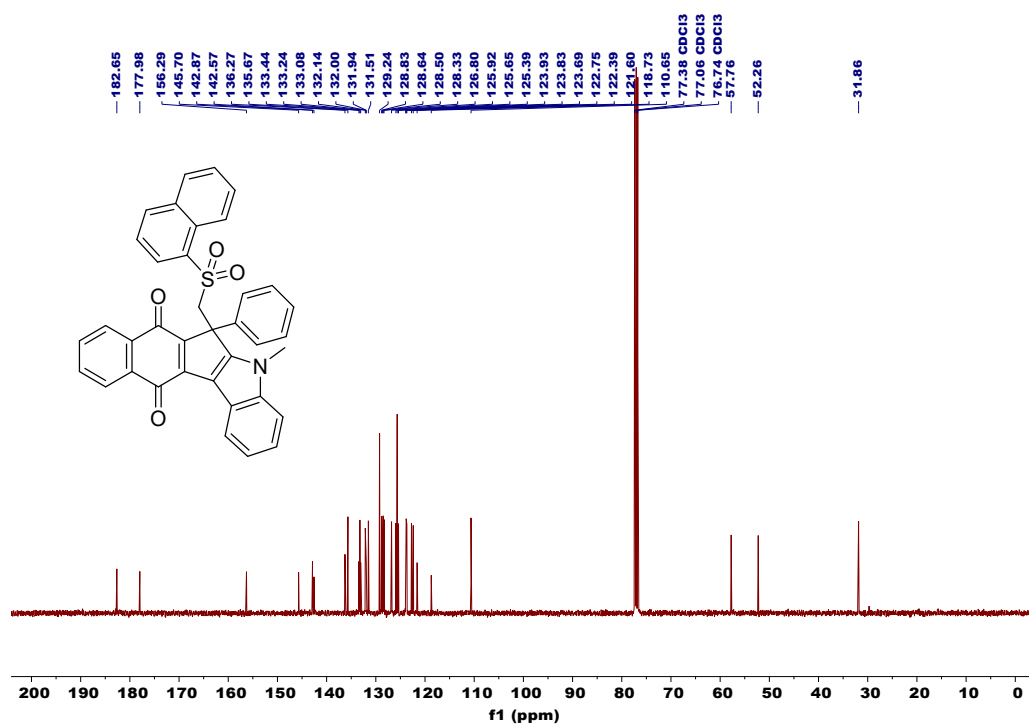



**5-methyl-6-phenyl-6-((thiophen-2-ylsulfonyl)methyl)-5,6-dihydrobenzo[5,6]indeno[2,1-b]indole-7,12-dione (38)**

**<sup>1</sup>H NMR (400 MHz)**

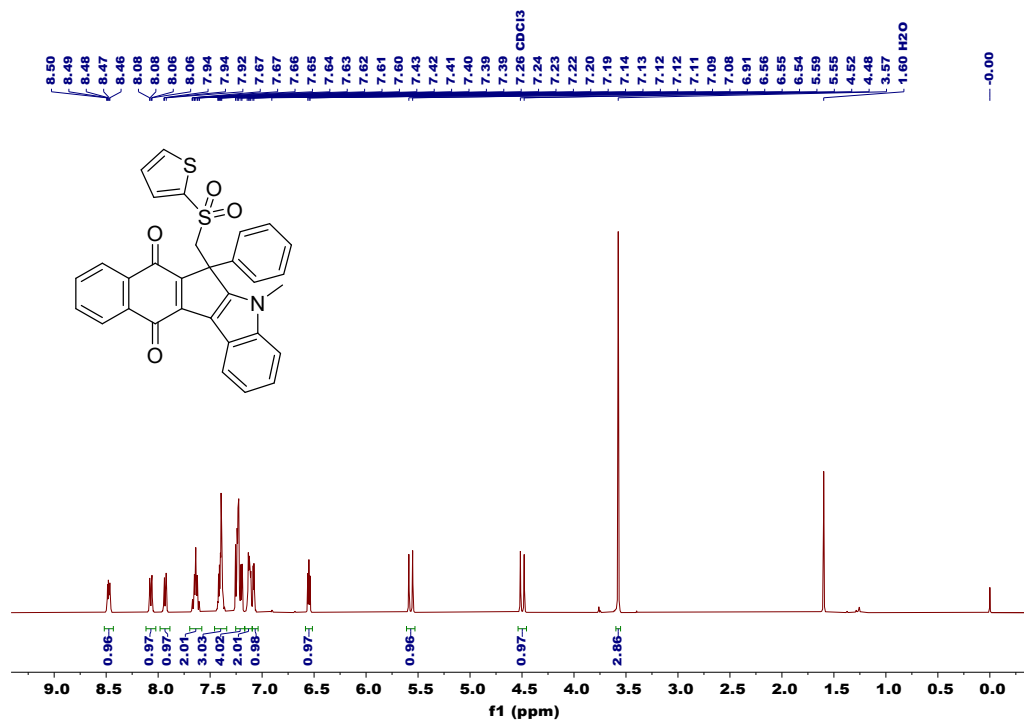

**<sup>13</sup>C {<sup>1</sup>H} NMR (101 MHz)**

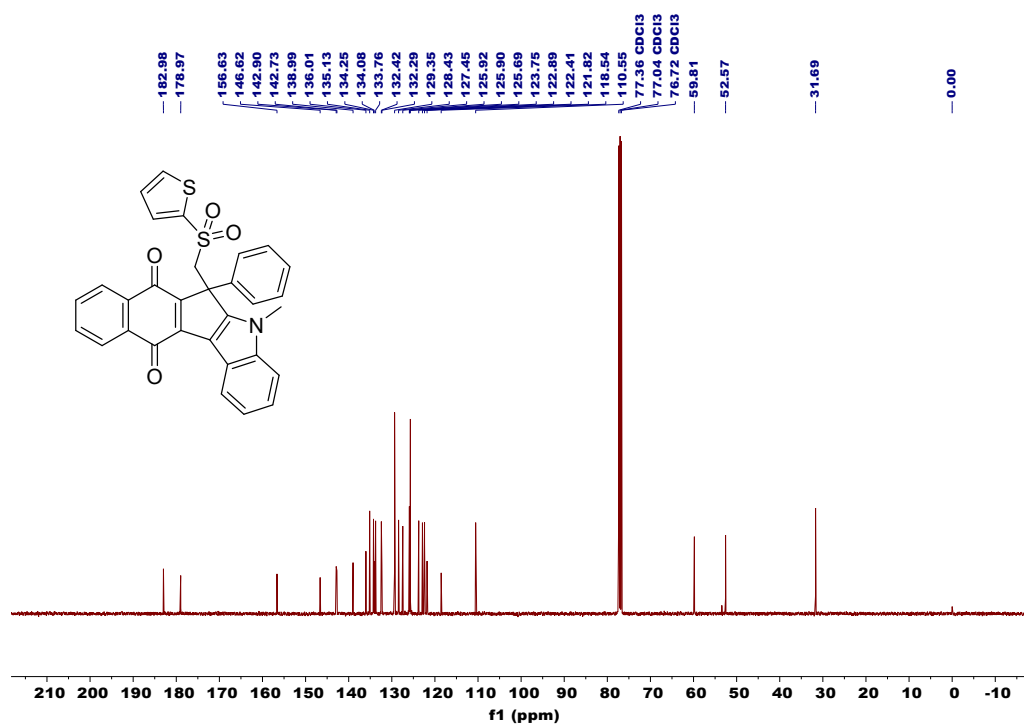

**(E)-1-((2-chloro-2-phenylvinyl)sulfonyl)-4-methylbenzene (39)**

**<sup>1</sup>H NMR (400 MHz)**

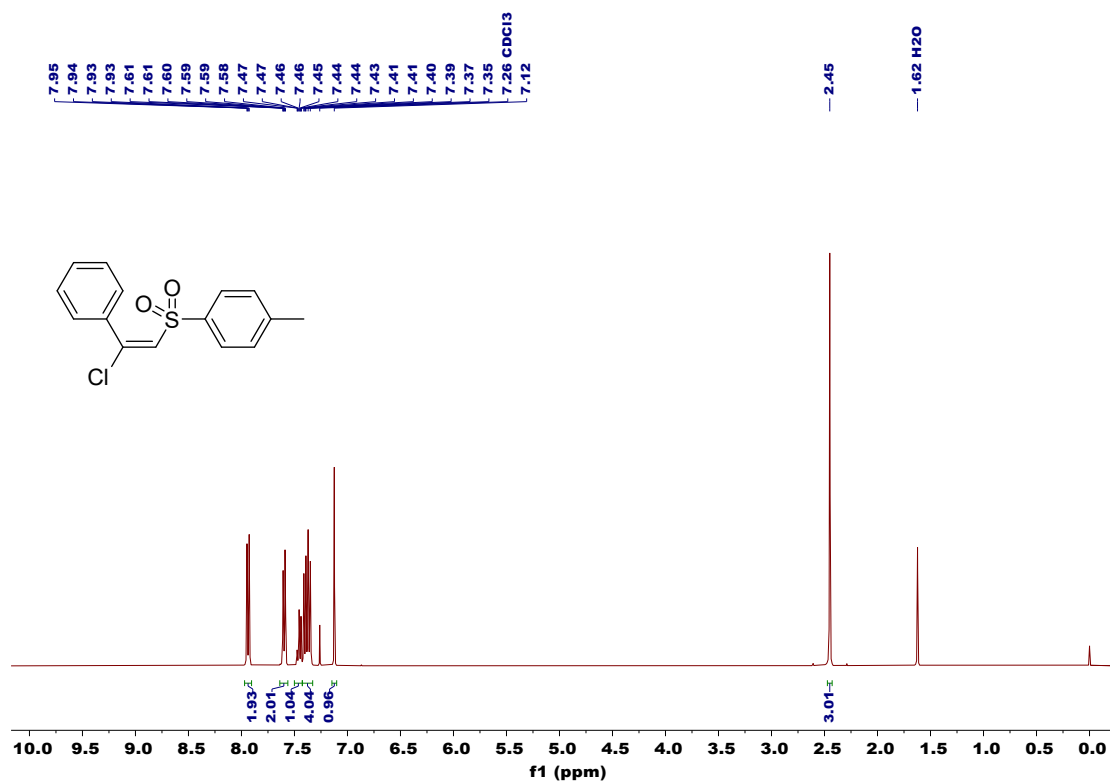

**<sup>13</sup>C {<sup>1</sup>H} NMR (101 MHz)**

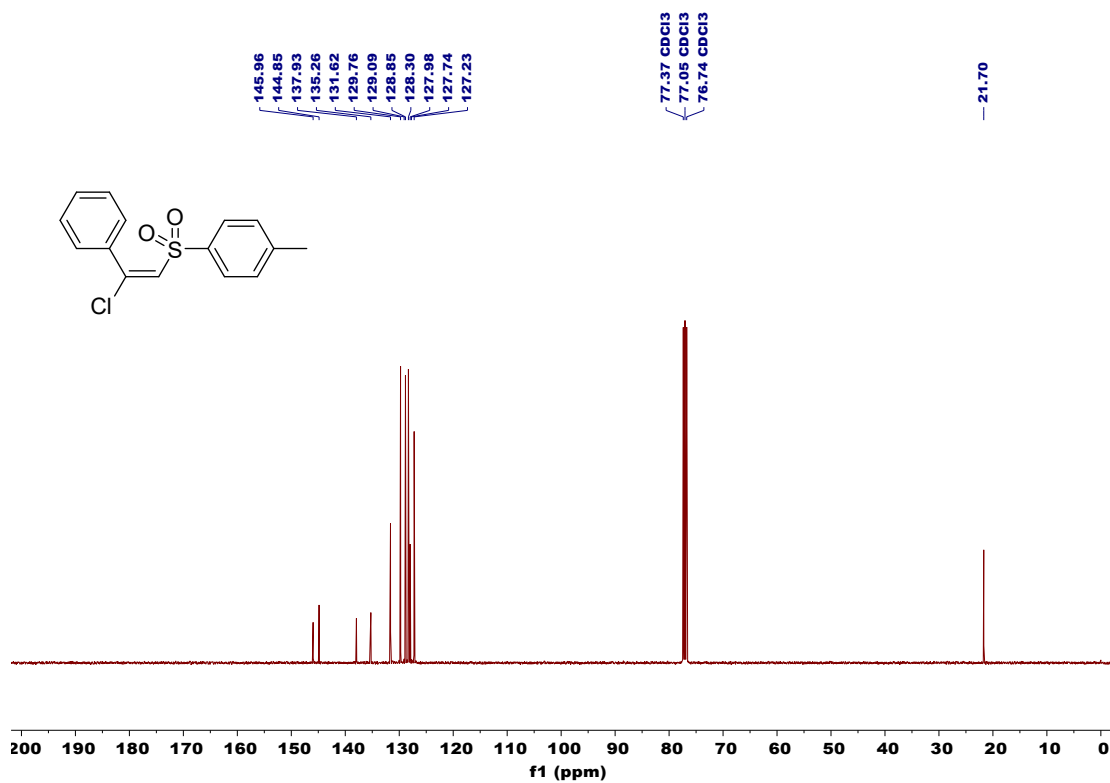

# 2-(1-methyl-1*H*-indol-3-yl)-3-(1-phenyl-2-tosylvinyl)naphthalene-1,4-dione (41)

$^1\text{H}$  NMR (400 MHz)

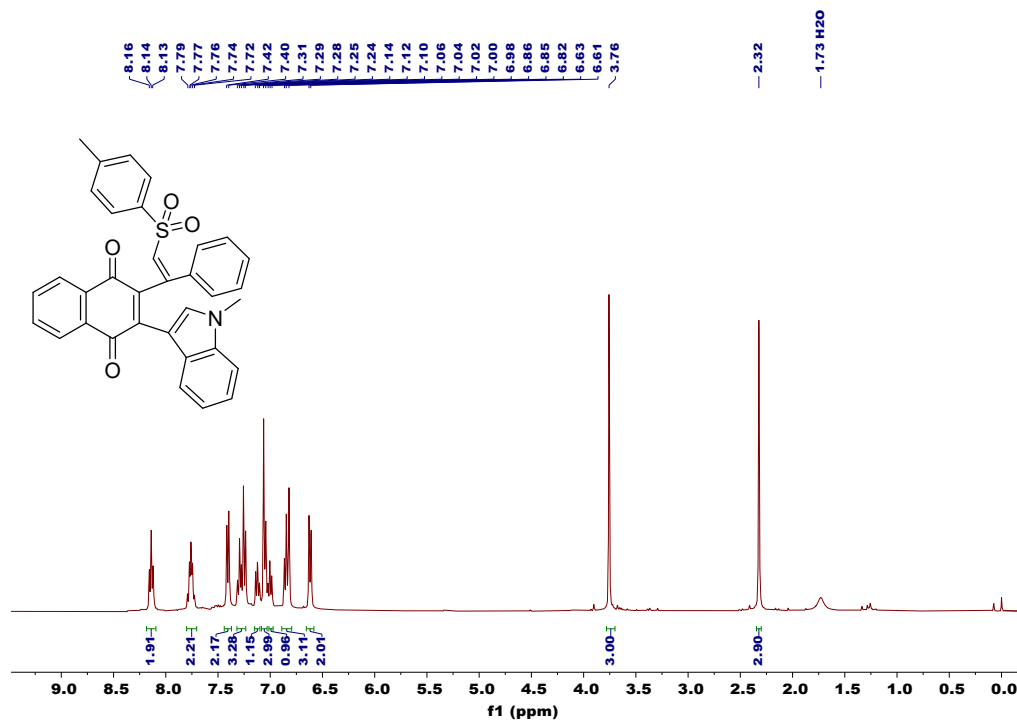

$^{13}\text{C}$   $\{^1\text{H}\}$  NMR (101 MHz)

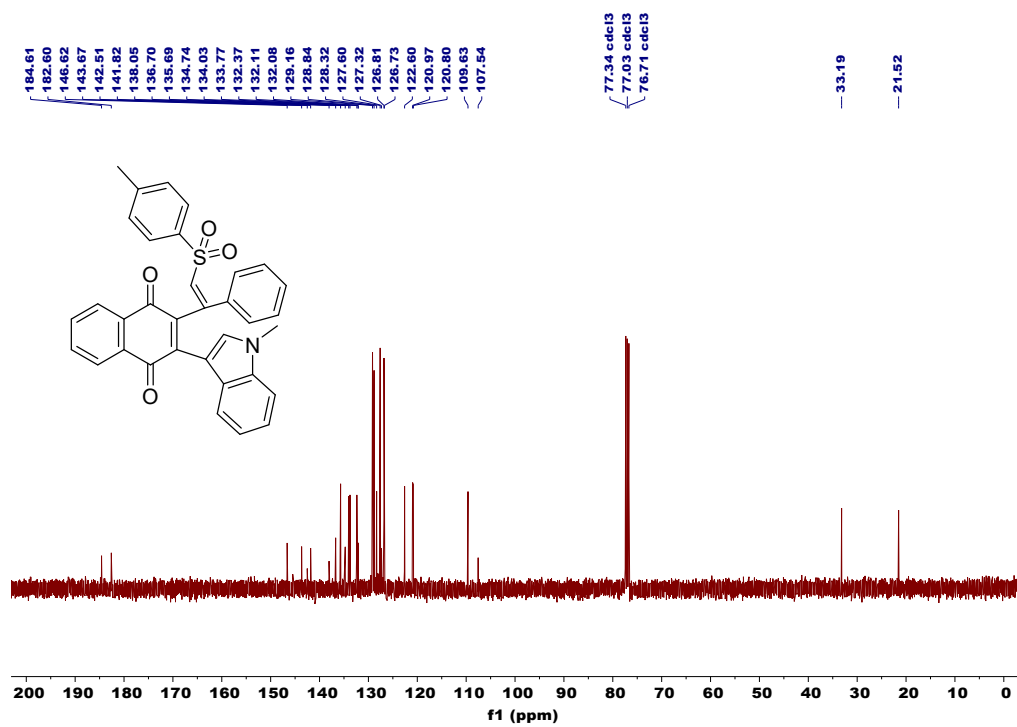

# 5-methyl-7-phenyl-5H-naphtho[2,3-c]carbazole-8,13-dione (42)

## <sup>1</sup>H NMR (400 MHz)

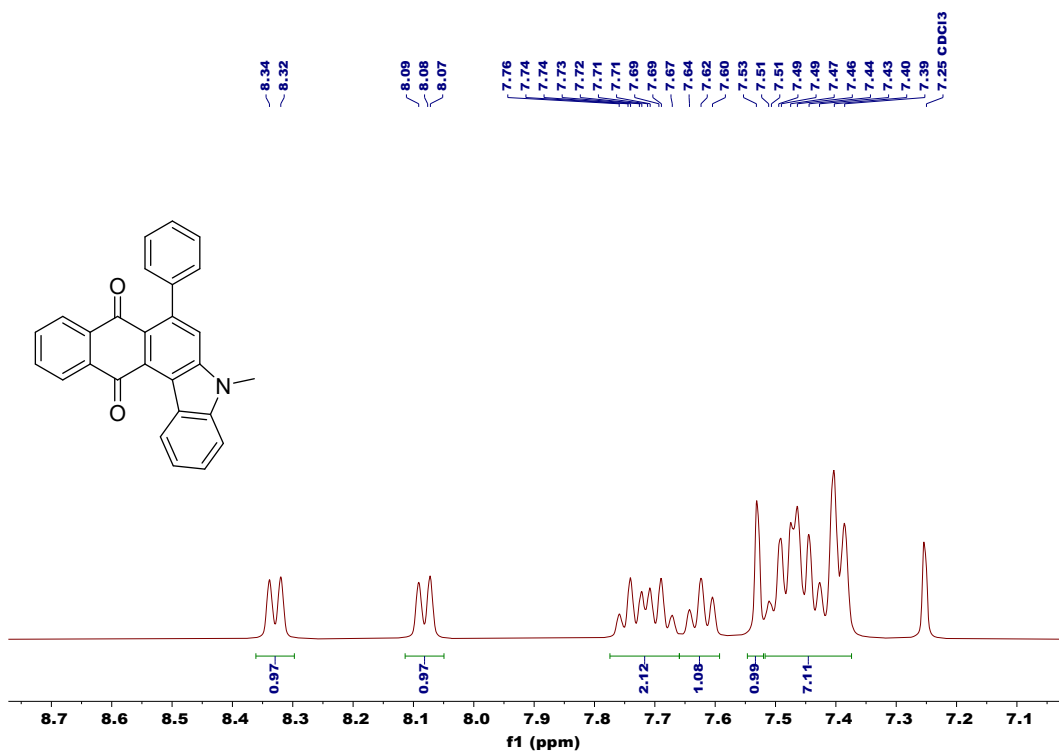

## <sup>13</sup>C {<sup>1</sup>H} NMR (101 MHz)

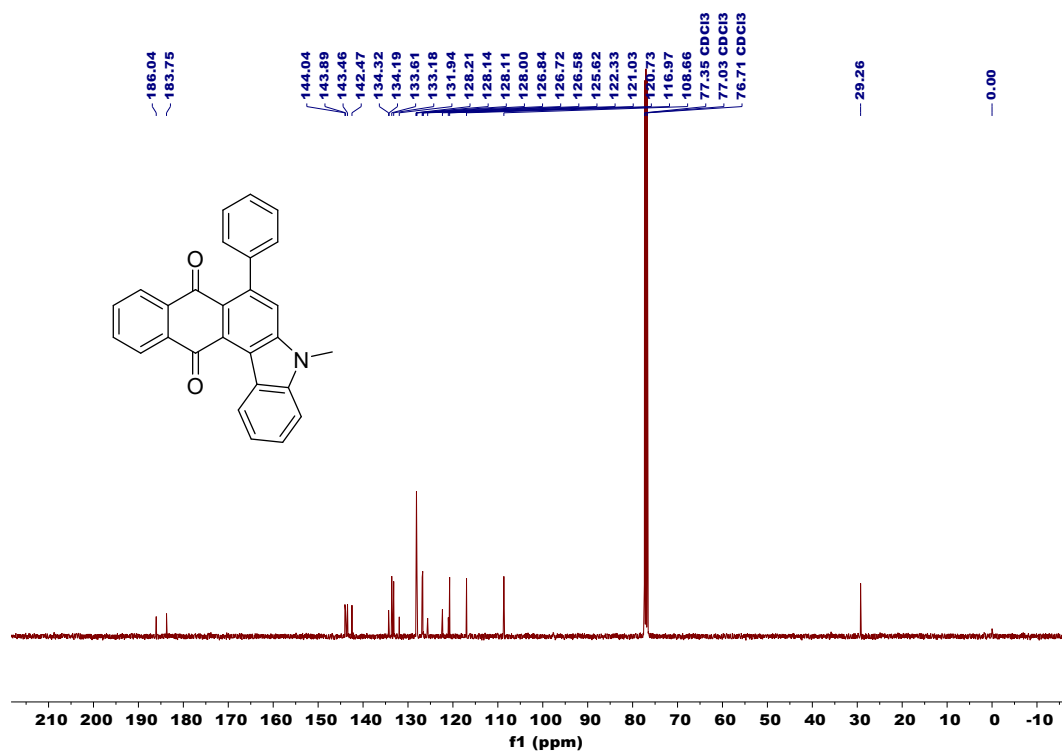

Supplement: d4qo01560f1.pdf [file d4qo01560f1.pdf]
